# Supplementary material for: Visible light-induced iridium(iii)-sensitized [2 + 2] and [3 + 2] photocycloadditions of 2-cyanochromone with alkenes
Source: Royal Society of Chemistry journal article supplement (doi:10.1039/d3ob00862b), 2023-01-01
Supplement: d3ob00862b1.pdf [file d3ob00862b1.pdf]

## Electronic Supplementary Information

### Visible light-induced Iridium(III)-sensitized [2+2] and [3+2] photocycloadditions of 2-cyanochromone with alkenes

Rajesh Dasi,<sup>a</sup> Alexander Villinger<sup>a</sup> and Malte Brasholz<sup>a,b\*</sup>

<sup>a</sup>University of Rostock, Institute of Chemistry, Albert-Einstein-Str. 3a, 18059 Rostock, Germany.

<sup>b</sup>Leibniz-Institut für Katalyse e.V., Albert-Einstein-Str. 29a, 18059 Rostock, Germany.

Email: malte.brasholz@uni-rostock.de

#### Contents:

|                                                          |       |
|----------------------------------------------------------|-------|
| 1 General information                                    | 2     |
| 2 Synthesis of 2-cyanochromone (1)                       | 2     |
| 3 Reaction optimization                                  | 3     |
| 4 Ir(III)-sensitized [2+2] photocycloadditions           | 4-16  |
| 5 Ir(III)-sensitized [2+2] and [3+2] photocycloadditions | 17-21 |
| 6 X-Ray crystal structures                               | 22-24 |
| 7 NMR spectra                                            | 25-48 |

## 1 General information

Commercially available chemicals were used as received from suppliers unless otherwise noted. Dry solvents used were obtained from suppliers in serum-cap quality. Solvents for chromatographic separation were distilled twice prior to use. Thin-layer chromatography was carried out using silica-coated aluminium plates, silica 60 F<sub>254</sub>, Merck. Column chromatography was performed with silica 60 (230-400 mesh, Macherey-Nagel). NMR spectra were recorded on Bruker AVANCE 500 NEO and Bruker AVANCE 300 III instruments, and spectra were calibrated against the (residual) solvent resonances of CDCl<sub>3</sub> ( $\delta^H = 7.26$  ppm,  $\delta^C = 77.16$  ppm). <sup>1</sup>H- and <sup>13</sup>C-NMR peak assignments were made based on 2D NMR spectra. ESI-TOF HRMS spectrometry was performed using an Agilent 1200/6210 Time-of-Flight LC-MS instrument. EI HR mass spectra were obtained from a Thermo Electron MAT 95-XP instrument. X-Ray crystallographic analyses were performed on Apex Kappa-II and D8 QUEST instruments by Bruker-AXS.

## 2 Synthesis of 2-cyanochromone (1)

2-Cyanochromone (**1**) was synthesized in a three-step process according to protocols described earlier.<sup>[1],[2]</sup> Initially, 2-chromone carboxylic acid was converted into its acyl chloride with PCl<sub>5</sub> followed aminolysis to give the 2-chromone carboxamide. Dehydration with the aid of tosyl chloride led to 2-cyanochromone (**1**).

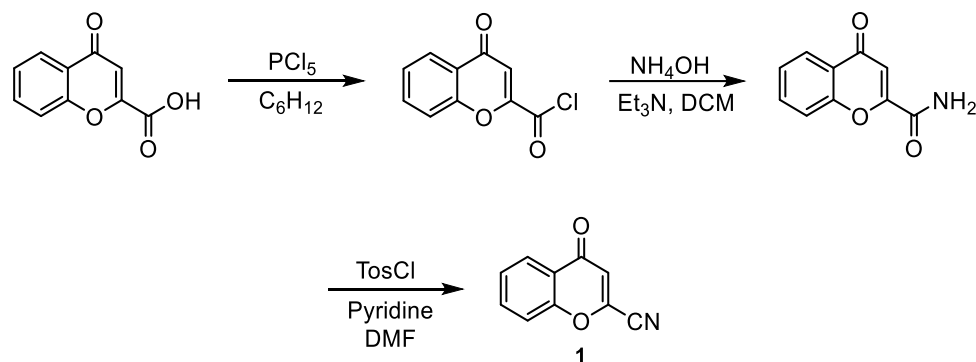

**Scheme 1.** Synthesis of 2-cyanochromone (**1**)

[1] F. Bousejra-ElGarah, B. Lajoie, J.-P. Souchard, G. Baziard, J. Bouajila, S. El Hage, *Med. Chem. Res.*, 2016, **25**, 2547-2556.

[2] G. P. Ellis, D. Shaw, *J. Med. Chem.*, 1972, **15**, 865-867.

### 3 Reaction optimization

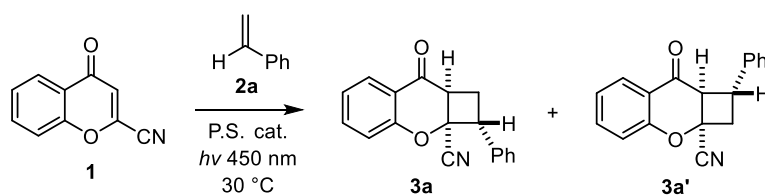

| #  | Sens (cat.)                                                                      | cat. (mol %) | 2a (eq.)  | time [h]  | solvent           | conv. 1 [%] <sup>[a]</sup> | yield. 3a [%] <sup>[a]</sup>  | yield 3a' [%] <sup>[a]</sup> |
|----|----------------------------------------------------------------------------------|--------------|-----------|-----------|-------------------|----------------------------|-------------------------------|------------------------------|
| 1  | 1,5-diamino AQ                                                                   | 10           | 20        | 24        | MeCN              | 10                         | 3                             | 1                            |
| 2  | thioxanthone                                                                     | 10           | 20        | 24        | MeCN              | 70                         | 42                            | 8                            |
| 3  | 4CzIPN                                                                           | 2            | 20        | 24        | MeCN              | 40                         | 17                            | 5                            |
| 4  | Eosin Y <sup>[b]</sup>                                                           | 2            | 20        | 24        | MeCN              | 32                         | 0                             | 0                            |
| 5  | Rose bengal <sup>[b]</sup>                                                       | 2            | 20        | 24        | MeCN              | 18                         | 0                             | 0                            |
| 6  | Ir(ppy) <sub>3</sub>                                                             | 2            | 20        | 24        | MeCN              | 35                         | 0                             | 0                            |
| 7  | [Ir(ppy) <sub>2</sub> dt(bpy)]PF <sub>6</sub>                                    | 2            | 20        | 24        | MeCN              | 55                         | 13                            | 5                            |
| 8  | (Ir[dF(CF <sub>3</sub> )ppy] <sub>2</sub> (dtbpy))PF <sub>6</sub>                | 2            | 20        | 24        | MeCN              | 70                         | 43                            | 12                           |
| 9  | Ru(bpy)(PF <sub>6</sub> ) <sub>2</sub>                                           | 2            | 20        | 24 h      | MeCN              | 3                          | 0                             | 0                            |
| 10 | (Ir[dF(CF <sub>3</sub> )ppy] <sub>2</sub> (dtbpy))PF <sub>6</sub>                | 1            | 20        | 24        | MeCN              | 50                         | 32                            | 10                           |
| 11 | (Ir[dF(CF <sub>3</sub> )ppy] <sub>2</sub> (dtbpy))PF <sub>6</sub>                | 3            | 20        | 24        | MeCN              | 79                         | 58                            | 11                           |
| 12 | (Ir[dF(CF <sub>3</sub> )ppy] <sub>2</sub> (dtbpy))PF <sub>6</sub>                | 4            | 20        | 24        | MeCN              | 70                         | 41                            | 10                           |
| 13 | (Ir[dF(CF <sub>3</sub> )ppy] <sub>2</sub> (dtbpy))PF <sub>6</sub>                | 3            | 20        | 36        | MeCN              | 93                         | 64                            | 13                           |
| 14 | (Ir[dF(CF <sub>3</sub> )ppy] <sub>2</sub> (dtbpy))PF <sub>6</sub>                | 3            | 15        | 36        | MeCN              | 80                         | 62                            | 13                           |
| 15 | <b>(Ir[dF(CF<sub>3</sub>)ppy]<sub>2</sub>(dtbpy))PF<sub>6</sub></b>              | <b>3</b>     | <b>10</b> | <b>36</b> | <b>MeCN</b>       | <b>96</b>                  | <b>72 (71%)<sup>[c]</sup></b> | <b>14</b>                    |
| 16 | (Ir[dF(CF <sub>3</sub> )ppy] <sub>2</sub> (dtbpy))PF <sub>6</sub>                | 3            | 5         | 36        | MeCN              | 87                         | 64                            | 14                           |
| 17 | (Ir[dF(CF <sub>3</sub> )ppy] <sub>2</sub> (dtbpy))PF <sub>6</sub>                | 3            | 10        | 36        | Acetone           | 85                         | 48                            | 13                           |
| 18 | (Ir[dF(CF <sub>3</sub> )ppy] <sub>2</sub> (dtbpy))PF <sub>6</sub>                | 3            | 10        | 36        | CHCl <sub>3</sub> | 64                         | 39                            | 18                           |
| 19 | (Ir[dF(CF <sub>3</sub> )ppy] <sub>2</sub> (dtbpy))PF <sub>6</sub>                | 3            | 10        | 36        | DCM               | 89                         | 43                            | 15                           |
| 20 | (Ir[dF(CF <sub>3</sub> )ppy] <sub>2</sub> (dtbpy))PF <sub>6</sub>                | 3            | 10        | 36        | DMF               | 67                         | 30                            | 9                            |
| 21 | (Ir[dF(CF <sub>3</sub> )ppy] <sub>2</sub> (dtbpy))PF <sub>6</sub> <sup>[d]</sup> | 3            | 10        | 36        | MeCN              | 2                          | 0                             | 0                            |
| 22 | (Ir[dF(CF <sub>3</sub> )ppy] <sub>2</sub> (dtbpy))PF <sub>6</sub> <sup>[e]</sup> | 3            | 10        | 36        | MeCN              | 4                          | 0                             | 0                            |
| 23 | (Ir[dF(CF <sub>3</sub> )ppy] <sub>2</sub> (dtbpy))PF <sub>6</sub> <sup>[f]</sup> | 3            | 10        | 36        | MeCN              | 72                         | 57                            | n.d.                         |

Reactions were performed on 0.1 mmol scale of **1** and with 450 nm LED irradiation (30 W). [a] Determined by <sup>1</sup>H NMR-analysis using CH<sub>2</sub>Br<sub>2</sub> as the internal standard. [b] Reaction performed with 530 nm LED irradiation (30 W). [c] Isolated yield. [d] Without irradiation. [e] Without sensitizer. [f] Under oxygen atmosphere.

## 4 Ir(III)-sensitized [2+2] photocycloadditions

### General procedure 1

A 10 mL crimp cap vial was charged with 4-oxo-4*H*-chromene-2-carbonitrile **1** (1.0 equiv.) and (Ir[dF(CF<sub>3</sub>)ppy]<sub>2</sub>(dtbpy))PF<sub>6</sub> (3 mol-%) and the vial was sealed. Dry MeCN (5.00 mL) and alkene **2** or **4** (10.0 equiv., freshly distilled) were added via syringe and the reaction mixture was saturated with argon for 5 minutes (via cannula). The reaction mixture was stirred vigorously for 36 h, while irradiated with blue LEDs (34 W, λ<sub>em</sub> = 450 nm, solution temperature 30 C). The solvent was evaporated and the crude mixture was purified by column chromatography (silica gel) to afford the products **3** or **5**.

(*Note*: regioisomer ratio was determined from crude <sup>1</sup>H-NMR spectra; in several cases regioisomers could not be entirely separated by column chromatography).

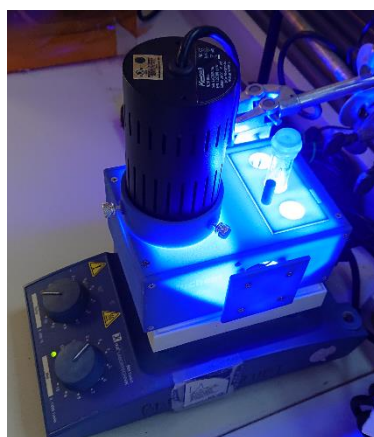

**Figure S1.** Irradiation setup, EvoluChem™ PhotoRedOx Box, 450 nm / 30 W blue LED.

### (2*R*\*,2*aR*\*,8*aS*\*)-8-Oxo-2-phenyl-1,2,8,8*a*-tetrahydro-2*aH*-cyclobuta[*b*]chromene-2*a*-carbonitrile (**3a**)

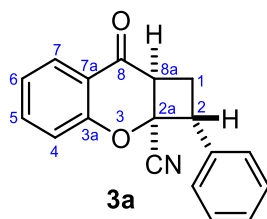

According to the General Procedure 1, 4-oxo-4*H*-chromene-2-carbonitrile (**1**, 17.1 mg, 0.10 mmol), (Ir[dF(CF<sub>3</sub>)ppy]<sub>2</sub>(dtbpy))PF<sub>6</sub> (3.4 mg, 3.0 μmol, 3 mol-%) and styrene (**2a**, 114.6 μL, 104.1 mg, 1.00 mmol) in MeCN (5.00 mL) gave, after 36 h reaction time and column chromatography (silica, EtOAc/heptane 1:3), compound **3a** as a colorless solid (19.5 mg, 71%).

**R<sub>f</sub>** = 0.38 (EtOAc /heptane 1:3). **m.p.**: 118-119 °C.

**<sup>1</sup>H NMR** (300 MHz, CDCl<sub>3</sub>) δ = 7.99 (ddd, *J* = 7.9, 1.8, 0.4 Hz, 1 H, 7-H), 7.62 (ddd, *J* = 8.4, 7.2, 1.8 Hz, 1 H, 5-H), 7.46-7.31 (m, 3 H, Ar-H), 7.30-7.26 (m, 2 H, Ar-H), 7.18 (ddd, *J* = 7.9, 7.2, 1.1 Hz, 1 H, 6-H), 7.10 (ddd, *J* = 8.4, 1.1, 0.4 Hz, 1 H, 4-H), 4.40 (m<sub>c</sub>, 1 H, 2-H), 3.71 (ddd, *J* = 9.4, 2.7, 1.1 Hz, 1 H, 8a-H), 2.81 (ddd, *J* = 11.9, 11.4, 9.4 Hz, 1 H, 1-H), 2.69 (ddd, *J* = 11.9, 9.6, 2.7 Hz, 1 H, 1-H) ppm.

**<sup>13</sup>C NMR** (75 MHz, CDCl<sub>3</sub>) δ = 190.5 (C-8), 157.4 (C-3a), 137.6 (C-5), 136.0 (Ar), 129.0 (Ar), 128.4 (Ar), 127.5 (C-7), 127.0 (Ar), 123.3 (C-6), 119.1 (C-7a), 118.8 (C-4), 116.4 (CN), 78.6 (C-2a), 48.4 (C-2), 45.6 (C-8a), 25.4 (C-1) ppm.

**IR:**  $\tilde{\nu}$  = 2930, 2860, 1685, 1610, 1450, 1310, 1220, 750, 695 cm<sup>-1</sup>.

**HRMS** (ESI+): *m/z* calc.: C<sub>18</sub>H<sub>14</sub>NO<sub>2</sub><sup>+</sup> [M+H]<sup>+</sup>: 276.1024, found: 276.1021.

Combining a number of smaller scaled reactions allowed for the isolation of a clean sample of the regioisomeric product (brown oil):

**(1*R*\*,2*aR*\*,8*aS*\*)-8-Oxo-1-phenyl-1,2,8,8*a*-tetrahydro-2*aH*-cyclobuta[*b*]chromene-2*a*-carbonitrile (3*a*' )**

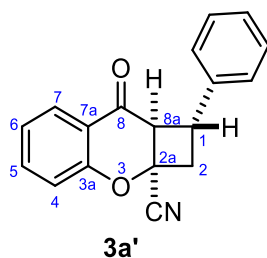

**R<sub>f</sub>** = 0.40 (EtOAc /heptane 1:3).

**<sup>1</sup>H NMR** (500 MHz, CDCl<sub>3</sub>) δ = 7.96 (dd, *J* = 7.8, 1.7 Hz, 1 H, 7-H), 7.61 (ddd, *J* = 9.0, 7.4, 1.7 Hz, 1 H, 5-H), 7.42-7.37 (m, 2 H, Ar-H), 7.36-7.33 (m, 2 H, Ar-H), 7.33-7.28 (m, 1 H, Ar-H), 7.21 (ddd, *J* = 7.8, 7.4, 1.0 Hz, 1 H, 6-H), 7.15 (dd, *J* = 9.2, 1.0 Hz, 1 H, 4-H), 4.21 (q, *J* = 9.2 Hz, 1 H, 1-H), 3.72 (d, *J* = 9.6 Hz, 1 H, 8a-H), 3.14 (ddd, *J* = 12.6, 8.3, 1.0 Hz, 1 H, 2-H), 3.00 (dd, *J* = 12.6, 8.3 Hz, 1 H, 2-H) ppm.

**<sup>13</sup>C NMR** (75 MHz, CDCl<sub>3</sub>) δ = 187.8 (C-8), 159.0 (C-3a), 140.0 (Ar), 137.1 (C-5), 129.0 (Ar), 127.7 (Ar), 127.7 (C-7), 126.5 (Ar), 124.0 (C-6), 120.2 (C-7a), 118.8 (C-4), 117.5 (CN), 70.5 (C-2a), 53.3 (C-8a), 41.0 (C-1), 40.6 (C-2) ppm.

**HRMS** (EI): *m/z* calc.: C<sub>18</sub>H<sub>13</sub>NO<sub>2</sub><sup>+</sup> [M]<sup>+</sup>: 275.0941, found: 275.0943.

**(2*R*\*,2*aR*\*,8*aS*\*)-8-Oxo-2-(*p*-tolyl)-1,2,8,8*a*-tetrahydro-2*aH*-cyclobuta[*b*]chromene-2*a*-carbonitrile (**3b**)**

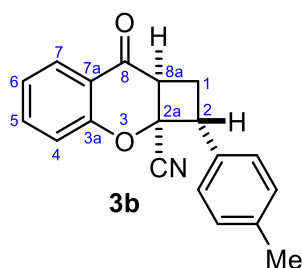

According to the General Procedure 1, 4-oxo-4*H*-chromene-2-carbonitrile (**1**, 17.1 mg, 0.10 mmol), (Ir[dF(CF<sub>3</sub>)ppy]<sub>2</sub>(dtbpy))PF<sub>6</sub> (3.4 mg, 3.0 μmol, 3 mol-%) and 4-methylstyrene (**2b**, 131.7 μL, 118.1 mg, 1.00 mmol) in MeCN (5.00 mL) gave, after 36 h reaction time and column chromatography (silica, EtOAc/heptane 1:3), compound **3b** as a yellow solid (22.0 mg, 76%).

**R<sub>f</sub>** = 0.36 (EtOAc /heptane 1:3). **m.p.**: 118-120 °C.

**<sup>1</sup>H NMR** (500 MHz, CDCl<sub>3</sub>) δ = 7.98 (dd, *J* = 7.9, 1.8 Hz, 1 H, 7-H), 7.61 (ddd, *J* = 8.4, 7.3, 1.8 Hz, 1 H, 5-H), 7.21 (d, *J* = 8.1 Hz, 2 H, Ar-H), 7.19-7.14 (m, 3 H, 6-H, Ar-H), 7.09 (dd, *J* = 8.4, 0.7 Hz, 1 H, 4-H), 4.35 (mc, 1 H, 2-H), 3.69 (ddd, *J* = 9.5, 2.6, 1.0 Hz, 1 H, 8*a*-H), 2.79 (td, *J* = 11.6, 9.5 Hz, 1 H, 1-H), 2.66 (ddd, *J* = 11.6, 9.5, 2.6 Hz, 1 H, 1-H), 2.36 (s, 3 H, CH<sub>3</sub>) ppm.

**<sup>13</sup>C NMR** (126 MHz, CDCl<sub>3</sub>) δ = 190.6 (C-8), 157.4 (C-3*a*), 138.2 (Ar), 137.6 (C-5), 133.0 (Ar), 129.7 (Ar), 127.5 (C-7), 126.9 (Ar), 123.3 (C-6), 119.1 (C-7*a*), 118.8 (C-4), 116.5 (CN), 78.8 (C-2*a*), 48.2 (C-2), 45.6 (C-8*a*), 25.5 (C-1), 21.3 (CH<sub>3</sub>) ppm.

**IR**:  $\tilde{\nu}$  = 2960, 2920, 1680, 1610, 1480, 1315, 1120, 815, 750, 480 cm<sup>-1</sup>.

**HRMS** (ESI<sup>+</sup>): *m/z* calc.: C<sub>19</sub>H<sub>15</sub>NNaO<sub>2</sub><sup>+</sup> [M+Na]<sup>+</sup>: 312.1000, found: 312.1006.

**(2*R*\*,2*aR*\*,8*aS*\*)-2-(4-(*Tert*-butyl)phenyl)-8-oxo-1,2,8,8*a*-tetrahydro-2*aH* cyclobuta[*b*]chromene-2*a*-carbonitrile (**3c**)**

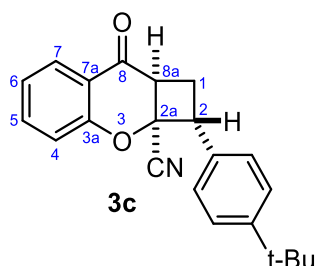

According to the General Procedure 1, 4-oxo-4*H*-chromene-2-carbonitrile (**1**, 17.1 mg, 0.10 mmol), (Ir[dF(CF<sub>3</sub>)ppy]<sub>2</sub>(dtbpy))PF<sub>6</sub> (3.4 mg, 3.0 μmol, 3 mol-%) and 4-*tert*-butylstyrene (**2c**, 183.2 μL, 160.2 mg, 1.00 mmol) in MeCN (5.00 mL) gave, after 36 h reaction time and column chromatography (silica, EtOAc/heptane 1:3), compound **3c** as a yellow solid (22.2 mg, 67%).

**R<sub>f</sub>** = 0.37 (EtOAc /heptane 1:3). **m.p.**: 127-130 °C.

**<sup>1</sup>H NMR** (500 MHz, CDCl<sub>3</sub>) δ = 7.99 (dd, *J* = 7.9, 1.8 Hz, 1 H, 7-H), 7.62 (ddd, *J* = 8.3, 7.2, 1.8 Hz, 1 H, 5-H), 7.42 (m<sub>c</sub>, 2 H, Ar-H), 7.22 (m<sub>c</sub>, 2 H, Ar-H), 7.17 (ddd, *J* = 7.9, 7.2, 1.0 Hz, 1 H, 6-H), 7.08 (dd, *J* = 8.3, 1.0 Hz, 1 H, 4-H), 4.35 (m<sub>c</sub>, 1 H, 2-H), 3.70 (ddd, *J* = 9.6, 2.6, 1.1 Hz, 1 H, 8a-H), 2.80 (td, *J* = 11.7, 9.6 Hz, 1 H, 1-H), 2.67 (ddd, *J* = 11.7, 9.6, 2.6 Hz, 1 H, 1-H), 1.33 (s, 9 H, *t*-Bu) ppm.

**<sup>13</sup>C NMR** (126 MHz, CDCl<sub>3</sub>) δ = 190.6 (C-8), 157.5 (C-3a), 151.4 (Ar), 137.6 (C-5), 132.9 (Ar), 127.5 (C-7), 126.9 (Ar), 125.9 (Ar), 123.3 (C-6), 119.1 (C-7a), 118.8 (C-4), 116.5 (CN), 78.7 (C-2a), 48.2 (C-2), 45.6 (C-8a), 34.7 (*t*-Bu), 31.4 (*t*-Bu), 25.7 (C-1) ppm.

**IR:**  $\tilde{\nu}$  = 2960, 1687, 1610, 1460, 1220, 1120, 830, 760 cm<sup>-1</sup>.

**HRMS** (ESI+): *m/z* calc.: C<sub>22</sub>H<sub>22</sub>NO<sub>2</sub><sup>+</sup> [M+H]<sup>+</sup>: 332.1651, found: 332.1656.

**(2*R*\*,2*aR*\*,8*aS*\*)-2-(4-Methoxyphenyl)-8-oxo-1,2,8,8*a*-tetrahydro-2*aH*-cyclobuta[*b*]chromene-2*a*-carbonitrile (**3d**)**

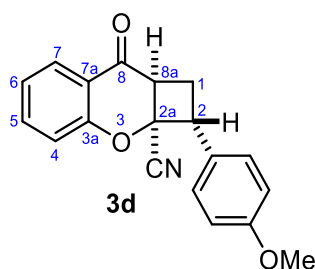

According to the General Procedure 1, 4-oxo-4*H*-chromene-2-carbonitrile (**1**, 17.1 mg, 0.10 mmol), (Ir[dF(CF<sub>3</sub>)ppy]<sub>2</sub>(dtbpy))PF<sub>6</sub> (3.4 mg, 3.0 μmol, 3 mol-%) and 4-methoxystyrene (**2d**, 122.0 μL, 134.1 mg, 1.00 mmol) in MeCN (5.00 mL) gave, after 36 h reaction time and column chromatography (silica, EtOAc/heptane 1:3), compound **3d** as a brown solid (19.2 mg, 63%).

**R<sub>f</sub>** = 0.34 (EtOAc /heptane 1:3). **m.p.:** 124-127 °C.

**<sup>1</sup>H NMR** (500 MHz, CDCl<sub>3</sub>) δ = 7.98 (dd, *J* = 7.9, 1.7 Hz, 1 H, 7-H), 7.61 (ddd, *J* = 8.4, 7.2, 1.7 Hz, 1 H, 5-H), 7.20 (m<sub>c</sub>, 2 H, Ar-H), 7.17 (ddd, *J* = 7.9, 7.2, 1.1 Hz, 1 H, 6-H), 7.08 (dd, *J* = 8.4, 1.1 Hz, 1 H, 4-H), 6.93 (m<sub>c</sub>, 2 H, Ar-H), 4.34 (m<sub>c</sub>, 1 H, 2-H), 3.81 (s, 3 H, OCH<sub>3</sub>), 3.69 (ddd, *J* = 9.5, 2.7, 1.1 Hz, 1 H, 8a-H), 2.77 (td, *J* = 12.3, 9.5 Hz, 1 H 1-H), 2.66 (ddd, *J* = 12.3, 9.5, 2.7 Hz, 1 H 1-H) ppm.

**<sup>13</sup>C NMR** (126 MHz, CDCl<sub>3</sub>) δ = 190.6 (C-8), 159.7 (Ar), 157.5 (C-3a), 137.6 (C-5), 128.3 (Ar), 128.0 (Ar), 127.5 (C-7), 123.3 (C-6), 119.1 (C-7a), 118.8 (C-4), 116.5 (CN), 114.4 (Ar), 78.9 (C-2a), 55.4 (OCH<sub>3</sub>), 48.0 (C-2), 45.5 (C-8a), 25.7 (C-1) ppm.

**IR:**  $\tilde{\nu}$  = 2960, 2840, 1690, 1520, 1460, 1240, 1120, 810, 755, 505 cm<sup>-1</sup>.

**HRMS** (ESI+): *m/z* calc.: C<sub>19</sub>H<sub>16</sub>NO<sub>3</sub><sup>+</sup> [M+H]<sup>+</sup>: 306.1130, found: 306.1136.

**(2*R*\*,2*aR*\*,8*aS*\*)-2-(3-Methoxyphenyl)-8-oxo-1,2,8,8*a*-tetrahydro-2*aH*-cyclobuta[*b*]chromene-2*a*-carbonitrile (**3e**)**

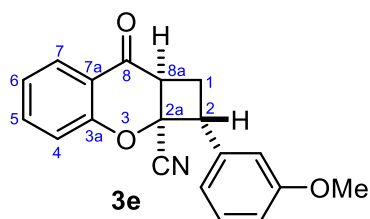

According to the General Procedure 1, 4-oxo-4*H*-chromene-2-carbonitrile (**1**, 17.1 mg, 0.10 mmol), (Ir[dF(CF<sub>3</sub>)ppy]<sub>2</sub>(dtbpy))PF<sub>6</sub> (3.4 mg, 3.0 μmol, 3 mol-%) and 3-methoxystyrene (**2e**, 122.0 μL, 134.1 mg, 1.00 mmol) in MeCN (5.00 mL) gave, after 36 h reaction time and column chromatography (silica, EtOAc/heptane 1:3), compound **3e** as a colorless solid (19.5 mg, 64%).

**R<sub>f</sub>** = 0.34 (EtOAc /heptane 1:3). **m.p.**: 128-130 °C.

**<sup>1</sup>H NMR** (500 MHz, CDCl<sub>3</sub>) δ = 7.98 (dd, *J* = 7.9, 1.7 Hz, 1 H, 7-H), 7.62 (ddd, *J* = 9.0, 7.2, 1.7 Hz, 1 H, 5-H), 7.33 (m<sub>c</sub>, 1 H, Ar-H), 7.17 (ddd, *J* = 7.9, 7.2, 1.1 Hz, 1 H, 6-H), 7.09 (dd, *J* = 9.0, 1.1 Hz, 1 H, 4-H), 6.90-6.84 (m, 2 H, Ar-H), 6.79 (m<sub>c</sub>, 1 H, Ar-H), 4.37 (m<sub>c</sub>, 1 H, 2-H), 3.83 (s, 3 H, OCH<sub>3</sub>), 3.69 (ddd, *J* = 9.5, 2.6, 1.1 Hz, 1 H, 8*a*-H), 2.78 (td, *J* = 12.1, 9.5 Hz, 1 H 1-H), 2.67 (ddd, *J* = 12.1, 9.5, 2.6 Hz, 1 H 1-H) ppm.

**<sup>13</sup>C NMR** (126 MHz, CDCl<sub>3</sub>) δ = 190.5 (C-8), 160.0 (Ar), 157.4 (C-3*a*), 137.6 (C-5), 137.6 (Ar), 130.1 (Ar), 127.5 (C-7), 123.3 (C-6), 119.2 (C-7*a*), 119.1 (Ar), 118.8 (C-4), 116.4 (CN), 113.4 (Ar), 113.1 (Ar), 78.5 (C-2*a*), 55.4 (OCH<sub>3</sub>), 48.3 (C-2), 45.6 (C-8*a*), 25.4 (C-1) ppm.

**IR**:  $\tilde{\nu}$  = 2960, 2920, 1690, 1460, 1130, 1055, 755, 690 cm<sup>-1</sup>.

**HRMS** (ESI+): *m/z* calc.: C<sub>19</sub>H<sub>16</sub>NO<sub>3</sub><sup>+</sup> [M+H]<sup>+</sup>: 306.1130, found: 306.1130.

**4-[(2*R*\*,2*aR*\*,8*aS*\*)-2*a*-Cyano-8-oxo-2,2*a*,8,8*a*-tetrahydro-1*H*-cyclobuta[*b*]chromen-2-yl]phenyl acetate (**3f**)**

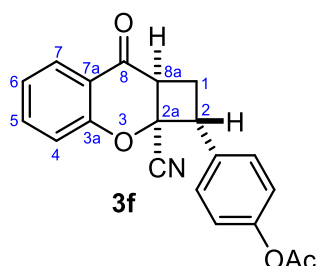

According to the General Procedure 1, 4-oxo-4*H*-chromene-2-carbonitrile (**1**, 17.1 mg, 0.10 mmol), (Ir[dF(CF<sub>3</sub>)ppy]<sub>2</sub>(dtbpy))PF<sub>6</sub> (3.4 mg, 3.0 μmol, 3 mol-%) and 4-acetoxyoxystyrene (**2f**, 153.0 μL, 162.2 mg, 1.00 mmol) in MeCN (5.00 mL) gave, after 36 h reaction time and column chromatography (silica, EtOAc/heptane 1:3), compound **3f** as a colorless solid (19.3 mg, 58%).

**R<sub>f</sub>** = 0.30 (EtOAc /heptane 1:3). **m.p.**: 128-131 °C.



**<sup>1</sup>H NMR** (500 MHz, CDCl<sub>3</sub>) δ = 7.98 (dd, *J* = 7.9, 1.7 Hz, 1 H, 7-H), 7.62 (ddd, *J* = 9.0, 7.3, 1.7 Hz, 1 H, 5-H), 7.29 (m<sub>c</sub>, 2 H, Ar-H), 7.18 (ddd, *J* = 7.9, 7.3, 1.1 Hz, 1 H, 6-H), 7.15 (m<sub>c</sub>, 2 H, Ar-H), 7.08 (dd, *J* = 9.0, 1.1 Hz, 1 H, 4-H), 4.37 (m<sub>c</sub>, 1 H, 2-H), 3.70 (ddd, *J* = 9.4, 2.5, 1.0 Hz, 1 H, 8a-H), 2.77 (td, *J* = 12.2, 9.4 Hz, 1 H, 1-H), 2.69 (ddd, *J* = 12.2, 9.4, 2.5 Hz, 1 H, 1-H), 2.30 (s, 3 H, CH<sub>3</sub>) ppm.

**<sup>13</sup>C NMR** (126 MHz, CDCl<sub>3</sub>) δ = 190.3 (C-8), 169.4 (OAc), 157.3 (C-3a), 150.7 (Ar), 137.7 (C-5), 133.5 (Ar), 128.2 (Ar), 127.5 (C-7), 123.4 (C-6), 122.2 (Ar), 119.1 (C-7a), 118.8 (C-4), 116.3 (CN), 78.5 (C-2a), 47.9 (C-2), 45.6 (C-8a), 25.6 (C-1), 21.3 (CH<sub>3</sub>) ppm.

**IR:**  $\tilde{\nu}$  = 2930, 1760, 1690, 1460, 1220, 1130, 760, 510 cm<sup>-1</sup>.

**HRMS** (ESI+): *m/z* calc.: C<sub>20</sub>H<sub>16</sub>NO<sub>4</sub><sup>+</sup> [M+H]<sup>+</sup>: 334.1079, found: 334.1081.

**(2*R*\*,2*aR*\*,8*aS*\*)-2-(4-Chlorophenyl)-8-oxo-1,2,8,8*a*-tetrahydro-2*aH*-cyclobuta[*b*]chromene-2*a*-carbonitrile (**3g**)**

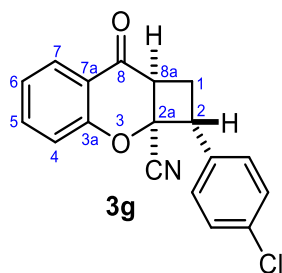

According to the General Procedure 1, 4-oxo-4*H*-chromene-2-carbonitrile (**1**, 17.1 mg, 0.10 mmol), (Ir[dF(CF<sub>3</sub>)ppy]<sub>2</sub>(dtbpy))PF<sub>6</sub> (3.4 mg, 3.0 μmol, 3 mol-%) and 4-chlorostyrene (**2g**, 120.0 μL, 138.6 mg, 1.00 mmol) in MeCN (5.00 mL) gave, after 36 h reaction time and column chromatography (silica, EtOAc/heptane 1:3), compound **3g** as a colorless solid (21.4 mg, 69%).

**R<sub>f</sub>** = 0.34 (EtOAc /heptane 1:3). **m.p.:** 126-128 °C.

**<sup>1</sup>H NMR** (500 MHz, CDCl<sub>3</sub>) δ = 7.98 (dd, *J* = 7.9, 1.8 Hz, 1 H, 7-H), 7.62 (ddd, *J* = 9.0, 7.2, 1.8 Hz, 1 H, 5-H), 7.38 (m<sub>c</sub>, 2 H, Ar-H), 7.22-7.19 (m, 2 H, Ar-H), 7.17 (ddd, *J* = 7.9, 7.2, 1.0 Hz, 1 H, 6-H), 7.09 (dd, *J* = 9.0, 1.0 Hz, 1 H, 4-H), 4.37 (m<sub>c</sub>, 1 H, 2-H), 3.70 (ddd, *J* = 9.3, 2.6, 1.0 Hz, 1 H, 8a-H), 2.70 (td, *J* = 12.1, 9.3 Hz, 1 H, 1-H), 2.69 (ddd, *J* = 12.1, 9.3, 2.6 Hz, 1 H, 1-H) ppm.

**<sup>13</sup>C NMR** (126 MHz, CDCl<sub>3</sub>) δ = 190.2 (C-8), 157.3 (C-3a), 137.7 (C-5), 134.5 (Ar), 134.4 (Ar), 129.2 (Ar), 128.4 (Ar), 127.5 (C-7), 123.5 (C-6), 119.1 (C-7a), 118.8 (C-4), 116.5 (CN), 78.5 (C-2a), 47.9 (C-2), 45.5 (C-8a), 25.3 (C-1) ppm.

**IR:**  $\tilde{\nu}$  = 2920, 2855, 1685, 1610, 1460, 1310, 1110, 810, 760, 510 cm<sup>-1</sup>.

**Elemental analysis:** C<sub>18</sub>H<sub>12</sub>ClNO<sub>2</sub>, calc.: C 69.80, H 3.91, N 4.52, found: C 68.81, H 3.90, N 4.28.

**(2*R*\*,2*aR*\*,8*aS*\*)-2-(2,6-Dichlorophenyl)-8-oxo-1,2,8,8*a*-tetrahydro-2*aH*-cyclobuta[*b*]chromene-2*a*-carbonitrile (**3h**)**

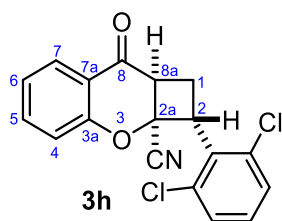

According to the General Procedure 1, 4-oxo-4*H*-chromene-2-carbonitrile (**1**, 17.1 mg, 0.10 mmol), (Ir[dF(CF<sub>3</sub>)ppy]<sub>2</sub>(dtbpy))PF<sub>6</sub> (3.4 mg, 3.0 μmol, 3 mol-%) and 2,6-dichlorostyrene (**2h**, 136.6 μL, 173.0 mg, 1.00 mmol) in MeCN (5.00 mL) gave, after 36 h reaction time and column chromatography (silica, EtOAc/heptane 1:3), compound **3h** as a colorless solid (9.6 mg, 28%).

**R<sub>f</sub>** = 0.37 (EtOAc /heptane 1:3). **m.p.**: 125-127 °C.

**<sup>1</sup>H NMR** (500 MHz, CDCl<sub>3</sub>) δ = 7.97 (dd, *J* = 7.9, 1.7 Hz, 1 H, 7-H), 7.61 (ddd, *J* = 9.0, 7.3, 1.7 Hz, 1 H, 5-H), 7.36 (d, *J* = 8.0 Hz, 2 H, Ar-H), 7.23-7.16 (m, 2 H, Ar-H, 6-H), 7.06 (dd, *J* = 9.0, 1.0 Hz, 1 H, 4-H), 5.10 (mc, 1 H, 2-H), 3.96-3.86 (m, 2 H, 1-H, 8a-H), 2.77 (ddd, *J* = 11.9, 8.6, 2.9 Hz, 1 H, 1-H) ppm.

**<sup>13</sup>C NMR** (126 MHz, CDCl<sub>3</sub>) δ = 190.5 (C-8), 157.5 (C-3a), 137.5 (C-5), 136.6 (Ar), 130.4 (Ar), 130.1 (Ar), 130.0 (Ar), 127.3 (C-7), 123.5 (C-6), 119.5 (C-7a), 119.1 (C-4), 116.7 (CN), 77.7 (C-2a), 46.5 (C-2), 45.7 (C-8a), 27.1 (C-1) ppm.

**IR**:  $\tilde{\nu}$  = 2970, 1690, 1610, 1460, 1310, 1110, 785, 745 cm<sup>-1</sup>.

**HRMS** (ESI+): *m/z* calc.: C<sub>18</sub>H<sub>12</sub>Cl<sub>2</sub>NO<sub>2</sub><sup>+</sup> [M+H]<sup>+</sup>: 344.0245, found: 344.0243.

**(2*R*\*,2*aS*\*,8*aS*\*)-2-(4-Fluorophenyl)-8-oxo-1,2,8,8*a*-tetrahydro-2*aH*-cyclobuta[*b*]chromene-2*a*-carbonitrile (**3i**)**

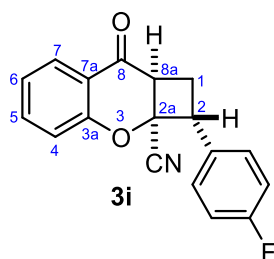

According to the General Procedure, 1,4-oxo-4*H*-chromene-2-carbonitrile (**1**, 17.1 mg, 0.10 mmol), (Ir[dF(CF<sub>3</sub>)ppy]<sub>2</sub>(dtbpy))PF<sub>6</sub> (3.4 mg, 3.0 μmol, 3 mol-%) and 4-fluorostyrene (**2i**, 119.2 μL, 122.1 mg, 1.00 mmol) in MeCN (5.00 mL) gave, after 36 h reaction time and column chromatography (silica, EtOAc/heptane 1:3), compound **3i** as a pale yellow oil (17.9 mg, 61%, containing 7% of its regioisomer that could not be separated).

**R<sub>f</sub>** = 0.38 (EtOAc /heptane 1:3).

**<sup>1</sup>H NMR** (500 MHz, CDCl<sub>3</sub>) δ = 7.98 (dd, *J* = 7.8, 1.8 Hz, 1 H, 7-H), 7.62 (ddd, *J* = 9.1, 7.2, 1.8 Hz, 1 H, 5-H), 7.24 (m<sub>c</sub>, 2 H, Ar-H), 7.18 (ddd, *J* = 7.8, 7.2, 1.0 Hz, 1 H, 6-H), 7.12-7.07 (m, 3 H, 4-H, Ar-H), 4.37 (m<sub>c</sub>, 1 H, 2-H), 3.70 (ddd, *J* = 9.4, 2.6, 0.9 Hz, 1 H, 8a-H), 2.76 (td, *J* = 12.1, 9.6 Hz, 1 H, 1-H), 2.69 (ddd, *J* = 12.1, 9.6, 2.7 Hz, 1 H, 1-H) ppm.

**<sup>13</sup>C NMR** (126 MHz, CDCl<sub>3</sub>) δ = 190.3 (C-8), 162.7 (<sup>1</sup>*J*<sub>C,F</sub> = 246.9 Hz, Ar), 157.3 (C-3a), 137.7 (C-5), 131.8 (<sup>4</sup>*J*<sub>C,F</sub> = 3.3 Hz, Ar), 128.8 (<sup>3</sup>*J*<sub>C,F</sub> = 8.4 Hz, Ar), 127.5 (C-7), 123.4 (C-6), 119.1 (C-7a), 118.7 (C-4), 116.3 (CN), 116.0 (<sup>2</sup>*J*<sub>C,F</sub> = 21.6 Hz, Ar) 78.6 (C-2a), 47.8 (C-2), 45.5 (C-8a), 25.5 (C-1) ppm.

**<sup>19</sup>F NMR** (282 MHz, CDCl<sub>3</sub>) δ = -113.43 (s, 1 F, Ar-F) ppm.

**Elemental analysis:** C<sub>18</sub>H<sub>12</sub>FNO<sub>2</sub>, calc.: C 73.71, H 4.12, N 4.78, found: C 71.35, H 4.60, N 4.32.

**(1*R*\*,2*aR*\*,8*aS*\*)-2-(Naphthalen-2-yl)-8-oxo-1,2,8,8*a*-tetrahydro-2*aH*-cyclobuta[*b*]chromene-2*a*-carbonitrile (**3j**)**

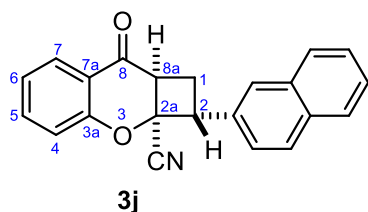

According to the General Procedure, 1,4-oxo-4*H*-chromene-2-carbonitrile (**1**, 17.1 mg, 0.10 mmol), (Ir[dF(CF<sub>3</sub>)ppy]<sub>2</sub>(dtbpy))PF<sub>6</sub> (3.4 mg, 3.0 μmol, 3 mol-%) and 2-vinylnaphthalene (**2j**, 154.2 mg, 1.00 mmol) in MeCN (5.00 mL) gave, after 36 h reaction time and column chromatography (silica, EtOAc/heptane 1:3), compound **3j** as a colorless oil (23.1 mg, 71%, containing 19% of its regioisomer that could not be separated).

*R*<sub>f</sub> = 0.41 (EtOAc/heptane 1:3).

**<sup>1</sup>H NMR** (500 MHz, CDCl<sub>3</sub>) δ = 8.01 (dd, *J* = 7.9, 1.8 Hz, 1 H, 7-H), 7.91-7.82 (m, 3 H, Ar-H), 7.69 (s, 1 H, Ar-H), 7.65 (ddd, *J* = 8.4, 7.4, 1.8 Hz, 1 H, 5-H), 7.54-7.48 (m, 2 H, Ar-H), 7.39 (dd, *J* = 8.6, 1.9 Hz, 1 H, Ar-H), 7.20 (ddd, *J* = 8.4, 7.2, 1.0 Hz, 1 H, 6-H), 7.15 (dd, *J* = 8.4, 1.0 Hz, 1 H, 4-H), 4.56 (m<sub>c</sub>, 1 H, 2-H), 3.75 (ddd, *J* = 9.5, 2.5, 1.0 Hz, 1 H, 8a-H), 2.94 (td, *J* = 12.0, 9.5 Hz, 1 H, 1-H), 2.78 (ddd, *J* = 12.0, 9.5, 2.5 Hz, 1 H, 1-H) ppm.

**<sup>13</sup>C NMR** (126 MHz, CDCl<sub>3</sub>) δ = 190.5 (C-8), 157.4 (C-3a), 137.7 (C-5), 128.9 (Ar), 128.1 (Ar), 127.9 (Ar), 127.5 (C-7), 126.7 (Ar), 126.5 (Ar), 125.9 (Ar), 124.7 (Ar), 123.4 (C-6), 119.1 (C-7a), 118.8 (C-4), 116.4 (CN), 78.6 (C-2a), 48.6 (C-2), 45.6 (C-8a), 25.4 (C-1) ppm.

**Elemental analysis:** C<sub>22</sub>H<sub>15</sub>NO<sub>2</sub>, calc.: C 81.21, H 4.65, N 4.30, found: C 81.75, H 5.10, N 3.72.

**(2*R*\*,2*aS*\*,8*aS*\*)-2-Methyl-8-oxo-2-phenyl-1,2,8,8*a*-tetrahydro-2*aH*-cyclobuta[*b*]chromene-2*a*-carbonitrile (**3l**)**

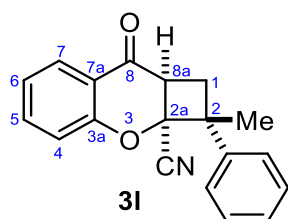

According to the General Procedure 1, 4-oxo-4*H*-chromene-2-carbonitrile (**1**, 17.1 mg, 0.10 mmol), (Ir[dF(CF<sub>3</sub>)ppy]<sub>2</sub>(dtbpy))PF<sub>6</sub> (3.4 mg, 3.0 μmol, 3 mol-%) and α-methylstyrene (**2l**, 129.9 μL, 118.2 mg, 1.00 mmol) in MeCN (5.00 mL) gave, after 36 h reaction time and column chromatography (silica, EtOAc/heptane 1:3), compound **3l** as a colorless solid (10.4 mg, 36%).

**R<sub>f</sub>**= 0.36 (EtOAc/heptane 1:3). **m.p.**: 138-139 °C.

**<sup>1</sup>H NMR** (500 MHz, CDCl<sub>3</sub>) δ = 7.90 (dd, *J* = 7.9, 1.8 Hz, 1 H, 7-H), 7.59 (ddd, *J* = 9.1, 7.4, 1.8 Hz, 1 H, 5-H), 7.46-7.41 (m, 2 H, Ar-H), 7.36-7.30 (m, 3 H, Ar-H), 7.14 (ddd, *J* = 7.9, 7.4, 1.1 Hz, 1 H, 6-H), 7.11 (dd, *J* = 9.1, 1.1 Hz, 1 H, 4-H), 3.71 (dd, *J* = 10.2, 4.3 Hz, 1 H, 8*a*-H), 3.14 (dd, *J* = 12.1, 10.2 Hz, 1 H, 1-H), 2.69 (dd, *J* = 12.1, 4.3 Hz, 1 H, 1-H), 1.51 (s, 3 H, CH<sub>3</sub>) ppm.

**<sup>13</sup>C NMR** (126 MHz, CDCl<sub>3</sub>) δ = 190.6 (C-8), 159.7 (C-3*a*), 143.7 (Ar), 137.3 (C-5), 129.0 (Ar), 127.8 (Ar), 127.2 (C-7), 125.2 (Ar), 123.0 (C-6), 119.1 (C-7*a*), 118.1 (C-4), 117.9 (CN), 79.3 (C-2*a*), 55.1 (C-2), 43.7 (C-8*a*), 33.6 (C-1), 25.4 (CH<sub>3</sub>) ppm.

**IR**:  $\tilde{\nu}$  = 2980, 1690, 1605, 1455, 1320, 1130, 760, 695 cm<sup>-1</sup>.

**HRMS** (ESI+): *m/z* calc.: C<sub>19</sub>H<sub>16</sub>NO<sub>2</sub><sup>+</sup> [M+H]<sup>+</sup>: 290.1181, found: 290.1178.

**(2*R*\*,2*aS*\*,8*aS*\*)-2-(4-Chlorophenyl)-2-methyl-8-oxo-1,2,8,8*a*-tetrahydro-2*aH*-cyclobuta[*b*]chromene-2*a*-carbonitrile (**3m**)**

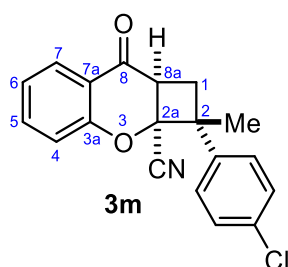

According to the General Procedure 1, 4-oxo-4*H*-chromene-2-carbonitrile (**1**, 17.1 mg, 0.10 mmol), (Ir[dF(CF<sub>3</sub>)ppy]<sub>2</sub>(dtbpy))PF<sub>6</sub> (3.4 mg, 3.0 μmol, 3 mol-%) and 4-chloro-α-methylstyrene (**2m**, 142.3 μL, 152.6 mg, 1.00 mmol) in MeCN (5.00 mL) gave, after 36 h reaction time and column chromatography (silica, EtOAc/heptane 1:3), compound **3m** as a colorless solid (11.0 mg, 34%).

**R<sub>f</sub>**= 0.35 (EtOAc/heptane 1:3). **m.p.**: 143-146°C.

**<sup>1</sup>H NMR** (500 MHz, CDCl<sub>3</sub>) δ = 7.89 (dd, *J* = 7.9, 1.8 Hz, 1 H, 7-H), 7.60 (ddd, *J* = 8.9, 7.3, 1.8 Hz, 1 H, 5-H), 7.40 (m<sub>c</sub>, 2 H, Ar-H), 7.25 (m<sub>c</sub>, 2 H, Ar-H), 7.15 (ddd, *J* = 7.9, 7.3, 1.0 Hz, 1 H,

6-H), 7.10 (dd,  $J = 8.9, 1.0$  Hz, 1 H, 4-H), 3.71 (dd,  $J = 10.2, 4.2$  Hz, 1 H, 8a-H), 3.08 (dd,  $J = 12.2, 10.2$  Hz, 1 H, 1 H, 1-H), 2.69 (dd,  $J = 12.2, 4.2$  Hz, 1 H, 1 H, 1-H), 1.48 (s, 3 H CH<sub>3</sub>) ppm.

**<sup>13</sup>C NMR** (126 MHz, CDCl<sub>3</sub>)  $\delta = 190.4$  (C-8), 159.5 (C-3a), 142.3 (Ar), 137.4 (C-5), 133.7 (Ar), 129.3 (Ar), 127.2 (C-7), 126.7 (Ar), 123.1 (C-6), 119.0 (C-7a), 118.0 (C-4), 117.8 (CN), 79.1 (C-2a), 54.8 (C-2), 43.5 (C-8a), 33.5 (C-1), 25.3 (CH<sub>3</sub>) ppm.

**IR:**  $\tilde{\nu} = 2980, 2940, 1690, 1610, 1310, 1090, 820, 755, 505$  cm<sup>-1</sup>.

**Elemental analysis:** C<sub>19</sub>H<sub>14</sub>ClNO<sub>2</sub>, calc.: C 70.48, H 4.36, N 4.33, found: C 70.28, H 5.00, N 4.37.

**(4a*R*\*,4b*S*\*,10a*S*\*,10b*R*\*)-10-Oxo-4a-phenyl-1,2,3,4,4a,10,10a,10b-octahydro-4b*H*-benzo[3,4]cyclobuta[1,2-*b*]chromene-4b-carbonitrile (3n)**

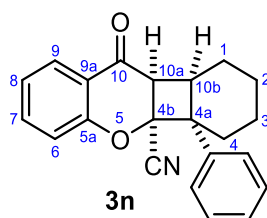

According to the General Procedure 1, 4-oxo-4*H*-chromene-2-carbonitrile (**1**, 17.1 mg, 0.10 mmol), (Ir[dF(CF<sub>3</sub>)ppy]<sub>2</sub>(dtbpy))PF<sub>6</sub> (3.4 mg, 3.0  $\mu$ mol, 3 mol-%) and 1-phenyl-1-cyclohexene (**2n**, 159.5  $\mu$ L, 158.2 mg, 1.00 mmol) in MeCN (5.00 mL) gave, after 36 h reaction time and column chromatography (silica, EtOAc/heptane 1:3), compound **3n** as a colorless solid (21.7 mg, 66%).

**R<sub>f</sub>** = 0.40 (EtOAc /heptane 1:3). **m.p.:** 128-130 °C.

**<sup>1</sup>H NMR** (500 MHz, CDCl<sub>3</sub>)  $\delta = 7.88$  (dd,  $J = 7.8, 1.7$  Hz, 1 H, 9-H), 7.45 (ddd,  $J = 9.0, 7.3, 1.7$  Hz, 1 H, 7-H), 7.40 (m<sub>c</sub>, 2 H, Ar-H), 7.33-7.27 (m, 3 H, Ar-H), 7.10 (m<sub>c</sub>, 1 H, 8-H), 6.87 (dd,  $J = 8.4, 0.7$  Hz, 1 H, 6-H), 3.62 (d,  $J = 10.8$  Hz, 1 H, 10a-H), 3.46 (dd,  $J = 10.8, 5.6$  Hz, 1 H, 10b-H), 2.24 (dt,  $J = 14.1, 3.5$  Hz, 1 H, 4-H), 2.14 (td,  $J = 13.1, 3.5$  Hz, 1 H, 4-H), 2.02 (m<sub>c</sub>, 1 H, 1-H), 1.95-1.82 (m, 2 H, 1-H, 2-H), 1.70-1.55 (m, 2 H, 2-H, 3-H), 1.16 (m<sub>c</sub>, 1 H, 3-H) ppm.

**<sup>13</sup>C NMR** (126 MHz, CDCl<sub>3</sub>)  $\delta = 189.0$  (C-10), 159.3 (C-5a), 141.1 (Ar), 136.7 (C-7), 128.5 (Ar), 127.2 (C-9), 127.2 (Ar), 126.7 (Ar), 123.6 (C-8), 120.1 (C-9a), 118.9 (C-6), 116.8 (CN), 77.3 (C-4b), 53.1 (C-4a), 44.9 (C-10a), 40.0 (C-10b), 34.9 (C-4), 24.4 (C-1), 21.0 (C-2), 20.0 (C-3) ppm.

**IR:**  $\tilde{\nu} = 2940, 2860, 1690, 1450, 1300, 1115, 760, 705, 540$  cm<sup>-1</sup>.

**HRMS** (ESI+):  $m/z$  calc.: C<sub>22</sub>H<sub>20</sub>NO<sub>2</sub><sup>+</sup> [M+H]<sup>+</sup>: 330.1494, found: 330.1493.

**(4a*R*\*,4b*S*\*,10a*S*\*,10b*R*\*)-10-Oxo-4a-(*m*-tolyl)-1,2,3,4,4a,10,10a,10b-octahydro-4b*H*-benzo[3,4]cyclobuta[1,2-*b*]chromene-4b-carbonitrile (**3o**)**

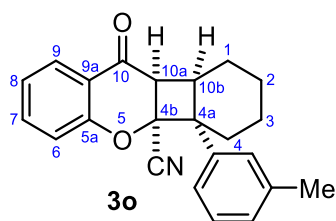

According to the General Procedure 1, 4-oxo-4*H*-chromene-2-carbonitrile (**1**, 17.1 mg, 0.10 mmol), (Ir[dF(CF<sub>3</sub>)ppy]<sub>2</sub>(dtbpy))PF<sub>6</sub> (3.4 mg, 3.0 μmol, 3 mol-%) and 3'-methyl-2,3,4,5-tetrahydro-1,1'-biphenyl (**2o**, 172.3 mg, 1.00 mmol) in MeCN (5.00 mL) gave, after 36 h reaction time and column chromatography (silica, EtOAc/heptane 1:3), compound **3o** as a pale yellow solid (16.9 mg, 49%).

**R<sub>f</sub>** = 0.41 (EtOAc /heptane 1:3). **m.p.**: 127-129 °C.

**<sup>1</sup>H NMR** (300 MHz, CDCl<sub>3</sub>) δ = 7.88 (dd, *J* = 7.8, 1.8 Hz, 1 H, 9-H), 7.45 (ddd, *J* = 9.0, 7.3, 1.8 Hz, 1 H, 7-H), 7.27 (t, *J* = 7.5 Hz, 1 H, Ar-H), 7.09 (m<sub>c</sub>, 4 H, Ar-H, 8-H), 6.89 (d, *J* = 9.0 Hz, 1 H, 6-H), 3.61 (d, *J* = 10.3 Hz, 1 H, 10a-H), 3.45 (dd, *J* = 10.3, 5.5 Hz, 1 H, 10b-H), 2.39 (s, 3 H, CH<sub>3</sub>), 2.23 (dt, *J* = 14.0, 3.3 Hz, 1 H, 4-H), 2.12 (td, *J* = 14.0, 3.1 Hz, 1 H, 4-H), 2.03-1.98 (m, 1 H, 1-H), 1.93-1.81 (m, 2 H, 1-H, 2-H), 1.68-1.59 (m, 2-H, 3-H), 1.16 (m<sub>c</sub>, 3-H) ppm.

**<sup>13</sup>C NMR** (75 MHz, CDCl<sub>3</sub>) δ = 189.1 (C-10), 159.3 (C-5a), 141.1 (Ar), 138.1 (Ar), 136.7 (C-7), 128.4 (Ar), 128.0 (Ar), 127.3 (Ar), 127.2 (C-9), 123.9 (Ar), 123.6 (C-8), 120.1 (C-9a), 119.0 (C-6), 116.8 (CN), 77.3 (C-4b), 53.0 (C-4a), 45.0 (C-10a), 40.0 (C-10b), 34.9 (C-4), 24.4 (C-1), 21.8 (CH<sub>3</sub>), 21.1 (C-2), 20.0 (C-3) ppm.

**IR:**  $\tilde{\nu}$  = 2940, 2860, 1690, 1610, 1460, 1305, 1110, 760, 710, 540 cm<sup>-1</sup>.

**HRMS** (ESI+): *m/z* calc.: C<sub>23</sub>H<sub>22</sub>NO<sub>2</sub><sup>+</sup> [M+H]<sup>+</sup>: 344.1650, found: 344.1646.

**(4a*R*\*,4b*S*\*,10a*S*\*,10b*R*\*)-4a-(4-Bromophenyl)-10-oxo-1,2,3,4,4a,10,10a,10b-octahydro-4b*H*-benzo[3,4]cyclobuta[1,2-*b*]chromene-4b-carbonitrile (**3p**)**

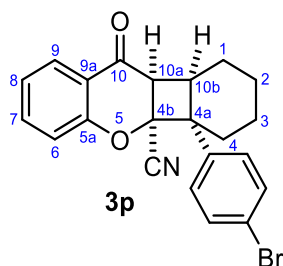

According to the General Procedure 1, 4-oxo-4*H*-chromene-2-carbonitrile (**1**, 17.1 mg, 0.10 mmol), (Ir[dF(CF<sub>3</sub>)ppy]<sub>2</sub>(dtbpy))PF<sub>6</sub> (3.4 mg, 3.0 μmol, 3 mol-%) and 4'-bromo-2,3,4,5-tetrahydro-1,1'-biphenyl (**2p**, 237.1 mg, 1.00 mmol) in MeCN (5.00 mL) gave, after 36 h reaction time and column chromatography (silica, EtOAc/heptane 1:3), compound **3p** as a colorless solid (28.2 mg, 69%).

$R_f = 0.40$  (EtOAc/heptane 1:3). **m.p.:** 136-138 °C.

**$^1\text{H NMR}$**  (500 MHz,  $\text{CDCl}_3$ )  $\delta = 7.88$  (dd,  $J = 7.9, 1.8$  Hz, 1 H, 9-H), 7.52 ( $m_c$ , 2 H, Ar-H), 7.47 (ddd,  $J = 9.0, 7.3, 1.8$  Hz, 1 H, 7-H), 7.15 ( $m$ , 2 H, Ar-H), 7.11 (ddd,  $J = 7.9, 7.3, 1.0$  Hz, 1 H, 8-H), 6.88 (dd,  $J = 9.0, 1.0$  Hz, 1 H, 6-H), 3.60 (d,  $J = 10.8$  Hz, 1 H, 10a-H), 3.40 (dd,  $J = 10.8, 5.3$  Hz, 1 H, 10b-H), 2.18 (dt,  $J = 13.9, 3.5$  Hz, 1 H, 4-H), 2.12 (td,  $J = 13.9, 3.2$  Hz, 1 H, 4-H), 2.07-1.96 ( $m$ , 1 H, 1-H), 1.90-1.79 ( $m$ , 2 H, 1-H, 2-H), 1.70-1.59 ( $m$ , 2 H, 2-H, 3-H), 1.12 ( $m_c$ , 1 H, 3-H) ppm.

**$^{13}\text{C NMR}$**  (75 MHz,  $\text{CDCl}_3$ )  $\delta = 188.7$  (C-10), 159.1 (C-5a), 140.2 (Ar), 136.8 (C-7), 131.7 (Ar), 128.5 (Ar), 127.2 (C-9), 123.8 (C-8), 121.3 (Ar), 120.0 (C-9a), 118.9 (C-6), 116.5 (CN), 77.1 (C-4b), 52.7 (C-4a), 44.8 (C-10a), 39.9 (C-10b), 34.7 (C-4), 24.3 (C-1), 20.9 (C-2), 19.9 (C-3) ppm.

**IR:**  $\tilde{\nu} = 2940, 2865, 1690, 1610, 1460, 1310, 1115, 765, 740, 530$   $\text{cm}^{-1}$ .

**HRMS** (ESI+):  $m/z$  calc.:  $\text{C}_{22}\text{H}_{19}\text{BrNO}_2^+$   $[\text{M}+\text{H}]^+$ : 408.0599, found: 408.0595.

### **(2*S*\*,2*aR*\*,8*aS*\*)-8-Oxo-1,2,8,8*a*-tetrahydro-2*aH*-cyclobuta[*b*]chromene-2,2*a*-dicyanonitrile (**5a**)**

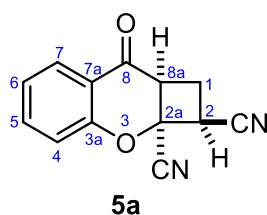

According to the General Procedure 1, 4-oxo-4*H*-chromene-2-carbonitrile (**1**, 17.1 mg, 0.10 mmol),  $(\text{Ir}[\text{dF}(\text{CF}_3)\text{ppy}]_2(\text{dtbpy}))\text{PF}_6$  (3.4 mg, 3.0  $\mu\text{mol}$ , 3 mol-%) and acrylonitrile (**4a**, 66.0  $\mu\text{L}$ , 54.0 mg, 1.00 mmol) in MeCN (5.00 mL) gave, after 36 h reaction time and column chromatography (silica, EtOAc/heptane 1:3), compound **5a** as a yellow solid (13.7 mg, 61%).

$R_f = 0.38$  (EtOAc/heptane 1:3). **m.p.:** 154-156 °C.

**$^1\text{H NMR}$**  (500 MHz,  $\text{CDCl}_3$ )  $\delta = 7.92$  (dd,  $J = 7.8, 1.6$  Hz, 1 H, 7-H), 7.67 (ddd,  $J = 8.3, 7.4, 1.6$  Hz, 1 H, 5-H), 7.26 ( $m_c$ , 2 H, 6-H, 4-H), 3.87 (t,  $J = 9.1$  Hz, 1 H, 2-H), 3.69 (t,  $J = 9.8$  Hz, 1 H, 8a-H), 3.05 (ddd,  $J = 11.9, 9.8, 9.1$  Hz, 1 H, 1-H), 2.94 (ddd,  $J = 11.9, 9.8, 9.1$  Hz, 1 H, 1-H) ppm.

**$^{13}\text{C NMR}$**  (75 MHz,  $\text{CDCl}_3$ )  $\delta = 186.1$  (C-8), 158.1 (C-3a), 137.8 (C-5), 127.6 (C-7), 124.9 (C-6), 119.8 (C-7a), 119.0 (C-4), 115.5 (CN), 113.9 (CN), 71.4 (C-2a), 44.6 (C-8a), 33.3 (C-2), 28.0 (C-1).

**IR:**  $\tilde{\nu} = 2990, 1690, 1600, 1460, 1300, 755, 740$   $\text{cm}^{-1}$ .

**HRMS** (ESI+):  $m/z$  calc.:  $\text{C}_{13}\text{H}_8\text{N}_2\text{NaO}_2^+$   $[\text{M}+\text{Na}]^+$ : 247.0478, found: 247.0483.

**(2*S*\*,2*aS*\*,8*aS*\*)-2-Methyl-8-oxo-1,2,8,8*a*-tetrahydro-2*aH*-cyclobuta[*b*]chromene-2,2*a*-dicarbonitrile (**5b**)**

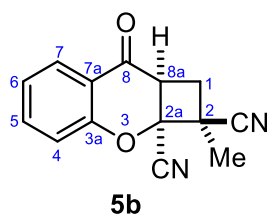

According to the General Procedure 1, 4-oxo-4*H*-chromene-2-carbonitrile (**1**, 17.1 mg, 0.10 mmol), (Ir[dF(CF<sub>3</sub>)ppy]<sub>2</sub>(dtbpy))PF<sub>6</sub> (3.4 mg, 3.0 μmol, 3 mol-%) and methacrylonitrile (**4b**, 84.0 μL, 68.0 mg, 1.00 mmol) in MeCN (5.00 mL) gave, after 36 h reaction time and column chromatography (silica, EtOAc/heptane 1:3), compound **5b** as a colorless solid (23.5 mg, 99%).

**R<sub>f</sub>** = 0.39 (EtOAc /heptane 1:3). **m.p.**: 152-154°C.

**<sup>1</sup>H NMR** (300 MHz, CDCl<sub>3</sub>) δ = 7.91 (dd, *J* = 7.9, 1.8 Hz, 1 H, 7-H), 7.65 (ddd, *J* = 8.5, 7.3, 1.8 Hz, 1 H, 5-H), 7.24 (m<sub>c</sub>, 2 H, 6-H, 4-H), 3.69 (dd, *J* = 10.2, 9.2 Hz, 1 H, 8*a*-H), 3.06 (dd, *J* = 12.2, 9.2 Hz, 1 H, 1-H), 2.67 (dd, *J* = 12.2, 10.2 Hz, 1 H, 1-H), 1.87 (s, 3 H, CH<sub>3</sub>) ppm.

**<sup>13</sup>C NMR** (75 MHz, CDCl<sub>3</sub>) δ = 186.7 (C-8), 158.1 (C-3*a*), 137.8 (C-5), 127.5 (C-7), 124.7 (C-6), 119.6 (C-7*a*), 118.9 (C-4), 117.5 (CN), 114.3 (CN), 76.1 (C-2*a*), 42.5 (C-8*a*), 40.4 (C-2), 34.6 (C-1), 21.7 (CH<sub>3</sub>) ppm.

**IR**:  $\tilde{\nu}$  = 2945, 2875, 1620, 1450, 1315, 1115, 760, 530 cm<sup>-1</sup>.

**HRMS** (ESI+): *m/z* calc.: C<sub>14</sub>H<sub>11</sub>N<sub>2</sub>NaO<sub>2</sub><sup>+</sup> [M+Na]<sup>+</sup>: 261.0639, found: 261.0640.



## 5 Ir(III)-sensitized [2+2] and [3+2] photocycloadditions

### General procedure 2

A 10 mL crimp cap vial was charged with 4-oxo-4*H*-chromene-2-carbonitrile **1** (1.0 equiv.) and (Ir[dF(CF<sub>3</sub>)ppy]<sub>2</sub>(dtbpy))PF<sub>6</sub> (3 mol-%) and the vial was sealed. Dry MeCN (5.00 mL) and alkene **2** (10.0 equiv., freshly distilled) were added via syringe and the reaction mixture was saturated with argon for 5 minutes (via cannula). The reaction mixture was stirred vigorously for 48 h, while irradiated with blue LEDs (34 W, λ<sub>em</sub> = 450 nm, solution temperature 30 °C). The solvent was evaporated. The dry residue was dissolved in acetone (3.00 mL) and 1 M HCl aq. (1.00 mL) was added. The mixture was stirred overnight, then poured into NaHCO<sub>3</sub> (aq.) and the aqueous layer was extracted with Et<sub>2</sub>O (3×). The organic phase was dried over MgSO<sub>4</sub>, filtered and evaporated to dryness. Column chromatography provided the products **3** and/or **6**.

### Modification:

Reactions that were run at 65 °C or -10 °C were conducted under identical conditions but using a setup consisting of a 10 W / 450 nm LED that was mounted on a glass fiber, which was immersed into the reaction mixture, inside a small glass tube (∅ ca. 5 mm). The reaction vial was either heated in an oil bath or cooled in a cooling bath (*i*-PrOH and crygenerator), see Figure S2.

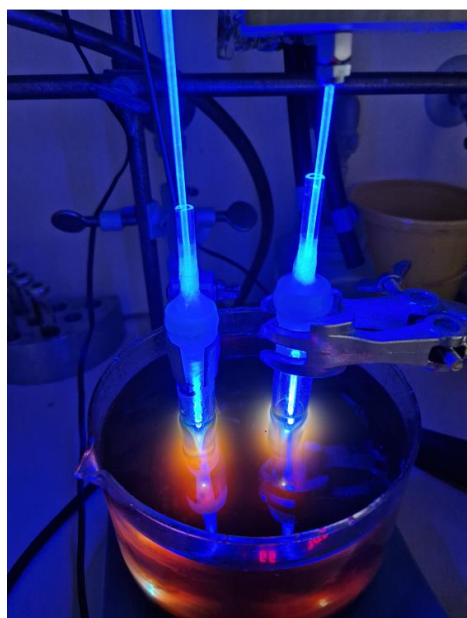

**Figure S2.** Irradiation setup for heated and cooled reactions, 450 nm / 10 W blue LED.

**(3aR\*,3bS\*,9aS\*,9bR\*)-3a-Methyl-9-oxo-2,3,3a,9,9a,9b-hexahydrocyclopenta[3,4]cyclobuta[1,2-*b*]chromene-3b(1*H*)-carbonitrile (3s)**

and

**(3aR\*,10bS\*)-3a-Methyl-2,3,3a,10b-tetrahydro-1*H*-pentaleno[2,1-*b*]chromene-4,10-dione (6s)**

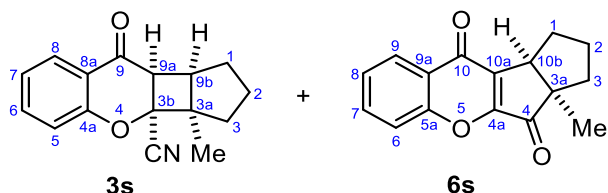

According to the General Procedure 2, 4-oxo-4*H*-chromene-2-carbonitrile (**1**, 17.1 mg, 0.10 mmol), (Ir[dF(CF<sub>3</sub>)ppy]<sub>2</sub>(dtbpy))PF<sub>6</sub> (3.4 mg, 3.0 μmol, 3 mol-%) and 1-methyl-1-cyclopentene (**2s**, 105.3 μL 82.1 mg, 1.00 mmol) in MeCN (5.00 mL) gave, after column chromatography (silica, EtOAc/heptane 1:3), compound **3s** as a brown solid (4.6 mg, 18%) and compound **6s** as a yellow solid (7.2 mg, 28%).

Analytical data for **3s**:

**R<sub>f</sub>** = 0.40 (EtOAc /heptane 1:3). **m.p.**: 131-133 °C.

**<sup>1</sup>H NMR** (500 MHz, CDCl<sub>3</sub>) δ = 7.86 (dd, *J* = 7.8, 1.7 Hz, 1 H, 8-H), 7.56 (ddd, *J* = 9.1, 7.4, 1.7 Hz, 1 H, 6-H), 7.13 (ddd, *J* = 7.8, 7.4, 1.0 Hz, 1 H, 7-H), 7.07 (dd, *J* = 9.1, 1.0 Hz, 1 H, 5-H), 3.11 (d, *J* = 6.6 Hz, 1 H, 9a-H), 2.72 (t, *J* = 6.6 Hz, 1 H, 9b-H), 2.31-2.24 (m, 1 H, 3-H), 2.06-1.97 (m, 2 H, 2-H), 1.97-1.88 (m, 1 H, 1-H), 1.85-1.74 (m, 1 H, 1-H), 1.69-1.60 (m, 1 H, 3-H), 1.30 (s, 3 H, CH<sub>3</sub>) ppm.

**<sup>13</sup>C NMR** (126 MHz, CDCl<sub>3</sub>) δ = 189.5 (C-9), 159.1 (C-4a), 137.0 (C-6), 127.2 (C-8), 123.3 (C-7), 119.8 (C-8a), 118.5 (C-5), 116.7 (CN), 76.4 (C-3b), 54.4 (C-3a), 49.9 (C-9b), 47.7 (C-9a), 38.0 (C-3), 32.2 (C-1), 25.7 (C-2), 19.6 (CH<sub>3</sub>) ppm.

**IR**:  $\tilde{\nu}$  = 2960, 1680, 1610, 1450, 1315, 1020, 760 cm<sup>-1</sup>.

**HRMS** (ESI+): *m/z* calc.: C<sub>16</sub>H<sub>16</sub>NO<sub>2</sub><sup>+</sup> [M+H]<sup>+</sup>: 254.1181, found: 254.1181.

Analytical data for **6s**:

**R<sub>f</sub>** = 0.38 (EtOAc /heptane 1:3). **m.p.**: 118-121 °C.

**<sup>1</sup>H NMR** (500 MHz, CDCl<sub>3</sub>) δ = 8.27 (dd, *J* = 8.0, 1.7 Hz, 1 H, 9-H), 7.75 (ddd, *J* = 8.5, 7.1, 1.7 Hz, 1 H, 7-H), 7.63 (dd, *J* = 8.5, 1.0 Hz, 1 H, 6-H), 7.47 (ddd, *J* = 8.0, 7.1, 1.0 Hz, 1 H, 8-H), 3.32 (dd, *J* = 8.7, 2.4 Hz, 1 H, 10b-H), 2.11-2.06 (m, 1 H, 3-H), 2.06-2.02 (m, 1 H, 1-H), 2.01-1.95 (m, 1 H, 1-H), 1.76-1.68 (m, 1 H, 2-H), 1.57-1.49 (m, 1 H, 3-H), 1.36 (s, 3 H, CH<sub>3</sub>), 1.33-1.24 (m, 1 H, 2-H) ppm.

**<sup>13</sup>C NMR** (126 MHz, CDCl<sub>3</sub>) δ = 206.9 (C-4), 178.1 (C-10), 156.4 (C-4a), 156.4 (C-5a), 141.3 (C-10a), 135.1 (C-7), 126.3 (C-9), 125.9 (C-8), 125.4 (C-9a), 119.4 (C-6), 55.3 (C-3a), 46.3 (C-10b), 38.2 (C-3), 29.1 (C-1), 25.4 (C-2), 22.5 (CH<sub>3</sub>) ppm.

**IR**:  $\tilde{\nu}$  = 2960, 2870, 1715, 1650, 1460, 1060, 760, 695 cm<sup>-1</sup>.

**HRMS** (ESI+):  $m/z$  calc.:  $C_{16}H_{15}O_3^+$   $[M+H]^+$ : 255.1021, found: 255.1021.

**(6aR\*,10aS\*)-6a-Methyl-6a,7,8,9,10,10a-hexahydroindeno[2,1-*b*]chromene-6,11-dione (6t)**

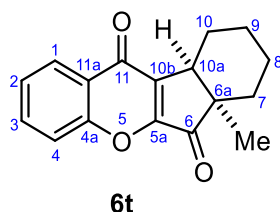

According to the General Procedure 2, 4-oxo-4*H*-chromene-2-carbonitrile (**1**, 17.1 mg, 0.10 mmol),  $(Ir[dF(CF_3)ppy]_2(dtbbpy))PF_6$  (3.4 mg, 3.0  $\mu$ mol, 3 mol-%) and 1-methyl-1-cyclohexene (**2t**, 118.6  $\mu$ L 96.2 mg, 1.00 mmol) in MeCN (5.00 mL) gave, after column chromatography (silica, EtOAc/heptane 1:3), compound **6t** as a yellow solid (12.1 mg, 44%).

$R_f$  = 0.40 (EtOAc/heptane 1:3). **m.p.**: 103-105 °C.

**$^1H$  NMR** (500 MHz,  $CDCl_3$ )  $\delta$  = 8.26 (dd,  $J$  = 8.0, 1.6 Hz, 1 H, 1-H), 7.75 (ddd,  $J$  = 8.8, 7.1, 1.6 Hz, 1 H, 3-H), 7.63 (dd,  $J$  = 8.8, 1.0 Hz, 1 H, 4-H), 7.47 (ddd,  $J$  = 8.0, 7.1, 1.0 Hz, 1 H, 2-H), 3.11 (t,  $J$  = 6.2 Hz, 1 H, 10a-H), 2.21-2.12 (m, 1 H, 10-H), 1.94-1.82 (m, 2 H, 10-H, 7-H), 1.63-1.54 (m, 2 H, 7-H, 8-H), 1.54-1.46 (m, 1 H, 8-H), 1.41-1.31 (m, 2 H, 9-H), 1.25 (s, 3 H,  $CH_3$ ) ppm.

**$^{13}C$  NMR** (126 MHz,  $CDCl_3$ )  $\delta$  = 206.3 (C-6), 178.2 (C-11), 156.4 (C-5a), 156.3 (C-4a), 141.4 (C-10b), 135.0 (C-3), 126.3 (C-1), 125.9 (C-2), 125.4 (C-11a), 119.3 (C-4), 47.8 (C-6a), 42.0 (C-10a), 30.6 (C-7), 25.1 (C-10), 24.5 ( $CH_3$ ), 19.5 (C-8), 19.5 (C-9) ppm.

**IR**:  $\tilde{\nu}$  = 2940, 2870, 1720, 1650, 1465, 1290, 1070, 760, 695  $cm^{-1}$ .

**HRMS** (ESI+):  $m/z$  calc.:  $C_{17}H_{17}O_3^+$   $[M+H]^+$ : 269.1178, found: 269.1177.

**(2aR\*,8aS\*)-1,1,2-Trimethyl-8-oxo-1,2,8,8a-tetrahydro-2a*H*-cyclobuta[*b*]chromene-2a-carbonitrile (3u)**

and

**(2aS\*,8aS\*)-1,1,2-Trimethyl-8-oxo-1,2,8,8a-tetrahydro-2a*H*-cyclobuta[*b*]chromene-2a-carbonitrile (3u')**

and

**1,1,2-Trimethyl-1,2-dihydrocyclopenta[*b*]chromene-3,9-dione (6u)**

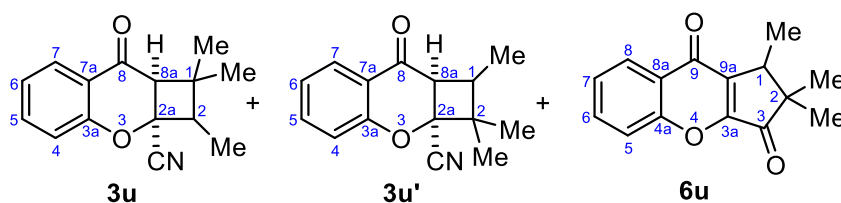

According to the General Procedure 2, 4-oxo-4*H*-chromene-2-carbonitrile (**1**, 17.1 mg, 0.10 mmol), (Ir[dF(CF<sub>3</sub>)ppy]<sub>2</sub>(dtbpy))PF<sub>6</sub> (3.4 mg, 3.0 μmol, 3 mol-%) and 2-methyl-2-butene (**2u**, 106.0 μL 70.1 mg, 1.00 mmol) in MeCN (5.00 mL) gave, after column chromatography (silica, EtOAc/heptane 1:3), compounds **3u** and **3u'** as a colorless oil (1.9 mg, 8%, inseparable mixture of isomers) and compound compound **6u** as a pale yellow oil (5.8 mg, 24%).

Analytical data for **3u/3u'**:

$R_f$  = 0.40 (EtOAc /heptane 1:3).

The complicated NMR spectrum did not allow for peak assignments.

**HRMS** (EI):  $m/z$  calc.: C<sub>15</sub>H<sub>15</sub>NO<sub>2</sub><sup>+</sup> [M]<sup>+</sup>: 241.1097, found: 241.1096.

Analytical data for **6u**:

$R_f$  = 0.38 (EtOAc /heptane 1:3).

**<sup>1</sup>H NMR** (500 MHz, CDCl<sub>3</sub>) δ = 8.26 (dd,  $J$  = 8.1, 1.7 Hz, 1 H, 8-H), 7.75 (ddd,  $J$  = 8.7, 7.1, 1.7 Hz, 1 H, 6-H), 7.62 (dd,  $J$  = 8.7, 1.0 Hz, 1 H, 5-H), 7.47 (ddd,  $J$  = 8.1, 7.1, 1.0 Hz, 1 H, 7-H), 3.14 (q,  $J$  = 7.2 Hz, 1 H, 1-H), 1.38 (d,  $J$  = 7.2 Hz, 1 H, CH<sub>3</sub>), 1.26 (s, 3 H, CH<sub>3</sub>), 1.19 (s, 3 H, CH<sub>3</sub>) ppm.

**<sup>13</sup>C NMR** (126 MHz, CDCl<sub>3</sub>) δ = 206.3 (C-3), 178.2 (C-9), 156.3 (C-4a), 155.5 (C-3a), 142.1 (C-9a), 135.0 (C-6), 126.2 (C-8), 125.9 (C-7), 125.5 (C-8a), 119.3 (C-5), 47.4 (C-2), 40.6 (C-1), 26.8 (CH<sub>3</sub>), 19.9 (CH<sub>3</sub>), 14.9 (CH<sub>3</sub>) ppm.

**IR**:  $\tilde{\nu}$  = 2970, 2860, 1720, 1655, 1455, 1010, 760 cm<sup>-1</sup>.

**HRMS** (ESI+):  $m/z$  calc.: C<sub>15</sub>H<sub>15</sub>O<sub>3</sub><sup>+</sup> [M+H]<sup>+</sup>: 243.1021, found: 243.1017.

### 1,1,2,2-Tetramethyl-1,2-dihydrocyclopenta[*b*]chromene-3,9-dione (**6v**)

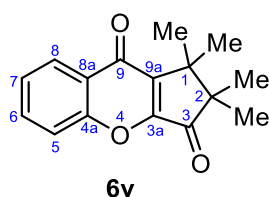

According to the General Procedure, 2, 4-oxo-4*H*-chromene-2-carbonitrile (**1**, 17.1 mg, 0.10 mmol), (Ir[dF(CF<sub>3</sub>)ppy]<sub>2</sub>(dtbpy))PF<sub>6</sub> (3.4 mg, 3.0 μmol, 3 mol-%) and 2,3-dimethyl-2-butene (**2v**, 119.0 μL 84.2 mg, 1.00 mmol) in MeCN (5.00 mL) gave, after column chromatography (silica, EtOAc/heptane 1:3), compound **6v** as a colorless oil (10.5 mg, 41%).

$R_f$  = 0.38 (EtOAc /heptane 1:3).

**<sup>1</sup>H NMR** (500 MHz, CDCl<sub>3</sub>) δ = 8.24 (dd,  $J$  = 8.0, 1.7 Hz, 1 H, 8-H), 7.73 (ddd,  $J$  = 8.6, 7.1, 1.7 Hz, 1 H, 6-H), 7.61 (dd,  $J$  = 8.6, 0.9 Hz, 1 H, 5-H), 7.46 (ddd,  $J$  = 8.0, 7.1, 0.9 Hz, 1 H, 7-H), 1.43 (s, 6 H, CH<sub>3</sub>), 1.18 (s, 6 H, CH<sub>3</sub>) ppm.

**<sup>13</sup>C NMR** (126 MHz, CDCl<sub>3</sub>) δ = 206.3 (C-3), 177.9 (C-9), 156.0 (C-4a), 155.3 (C-3a), 144.0 (C-9a), 134.9 (C-6), 126.3 (C-8), 125.9 (C-7), 125.8 (C-8a), 119.2 (C-5), 51.9 (C-2), 43.1 (C-1), 23.8 (2× CH<sub>3</sub>), 21.8 (2× CH<sub>3</sub>) ppm.

**HRMS** (ESI+): *m/z* calc.: C<sub>16</sub>H<sub>17</sub>O<sub>3</sub><sup>+</sup> [M+H]<sup>+</sup>: 257.1178, found: 257.1180.

## 6 X-Ray crystal structures

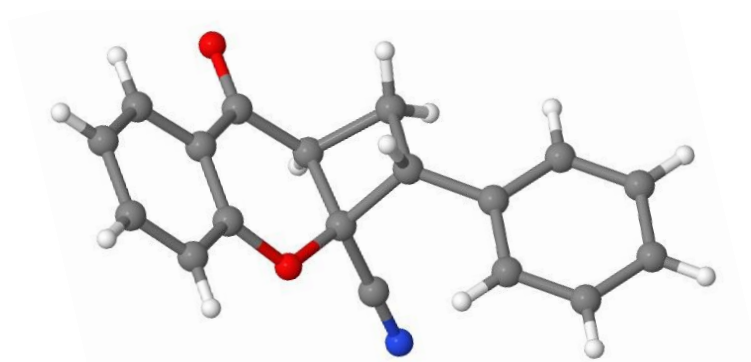

### Crystal data

|                          |           |        |         |
|--------------------------|-----------|--------|---------|
| Unit cell lengths (Å)    | 9.931     | 11.526 | 31.731  |
| Unit cell angles (deg)   | 90.580    | 92.359 | 109.744 |
| Space group Hall symbol  | -P 1      |        |         |
| Space group HM symbol    | P -1      |        |         |
| Crystal class            | Triclinic |        |         |
| International tables #   | 2         |        |         |
| Space group multiplicity | 2         |        |         |

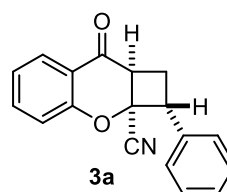

**Figure S3.** X-Ray crystal structure of compound **3a**, CCDC No. 2250461. The crystal structure data can be retrieved from the Cambridge Crystallographic Data Centre, [www.ccdc.cam.ac.uk](http://www.ccdc.cam.ac.uk).

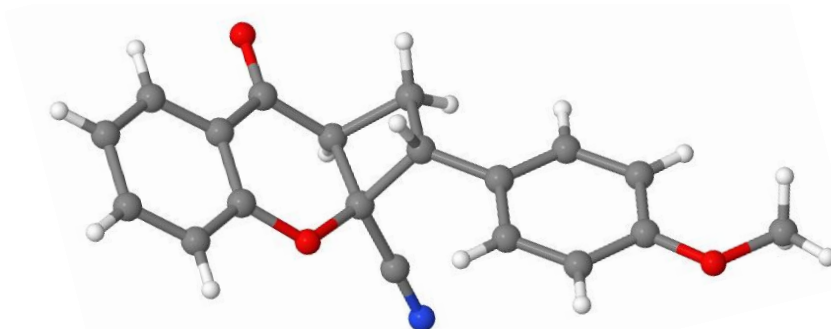

### Crystal data

|                          |            |         |        |
|--------------------------|------------|---------|--------|
| Unit cell lengths (Å)    | 14.645     | 6.393   | 17.586 |
| Unit cell angles (deg)   | 90.000     | 112.361 | 90.000 |
| Space group Hall symbol  | -P 2yn     |         |        |
| Space group HM symbol    | P 1 21/n 1 |         |        |
| Crystal class            | Monoclinic |         |        |
| International tables #   | 14         |         |        |
| Space group multiplicity | 4          |         |        |

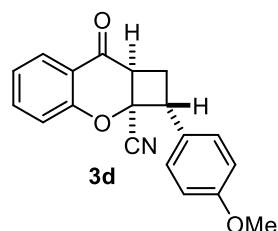

**Figure S4.** X-Ray crystal structure of compound **3d**, CCDC No. 2250462. The crystal structure data can be retrieved from the Cambridge Crystallographic Data Centre, [www.ccdc.cam.ac.uk](http://www.ccdc.cam.ac.uk).

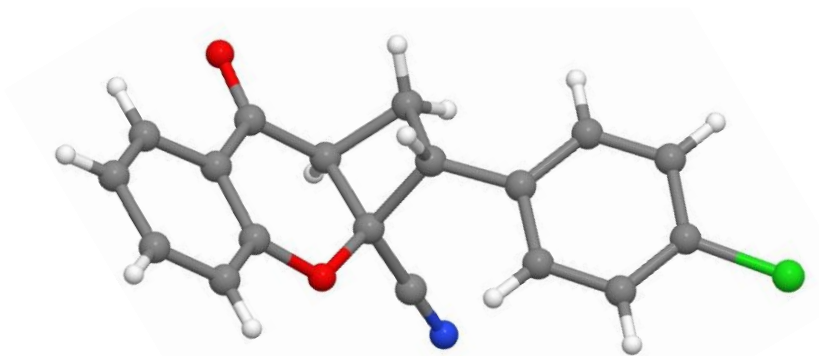

Crystal data

|                          |           |        |        |
|--------------------------|-----------|--------|--------|
| Unit cell lengths (Å)    | 8.063     | 9.882  | 10.105 |
| Unit cell angles (deg)   | 114.137   | 98.043 | 97.708 |
| Space group Hall symbol  | -P 1      |        |        |
| Space group HM symbol    | P -1      |        |        |
| Crystal class            | Triclinic |        |        |
| International tables #   | 2         |        |        |
| Space group multiplicity | 2         |        |        |

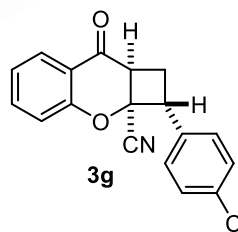

**Figure S5.** X-Ray crystal structure of compound **3g**, CCDC No. 2250463. The crystal structure data can be retrieved from the Cambridge Crystallographic Data Centre, [www.ccdc.cam.ac.uk](http://www.ccdc.cam.ac.uk).

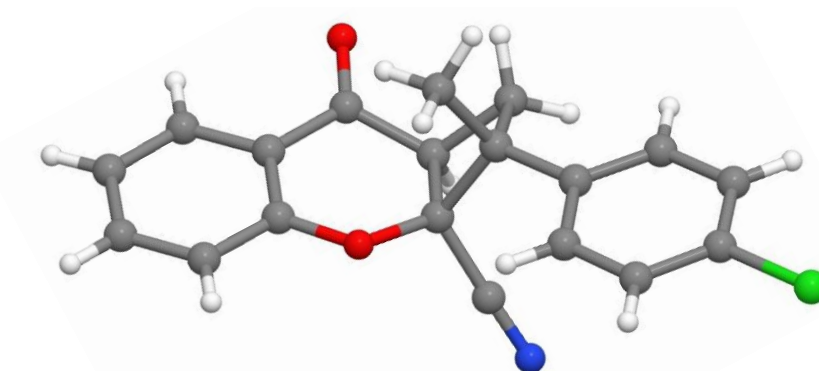

Crystal data

|                          |            |         |        |
|--------------------------|------------|---------|--------|
| Unit cell lengths (Å)    | 9.497      | 10.788  | 15.316 |
| Unit cell angles (deg)   | 90.000     | 104.883 | 90.000 |
| Space group Hall symbol  | -P 2yn     |         |        |
| Space group HM symbol    | P 1 21/n 1 |         |        |
| Crystal class            | Monoclinic |         |        |
| International tables #   | 14         |         |        |
| Space group multiplicity | 4          |         |        |

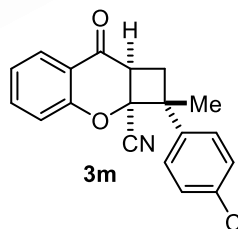

**Figure S6.** X-Ray crystal structure of compound **3m**, CCDC No. 2250464. The crystal structure data can be retrieved from the Cambridge Crystallographic Data Centre, [www.ccdc.cam.ac.uk](http://www.ccdc.cam.ac.uk).

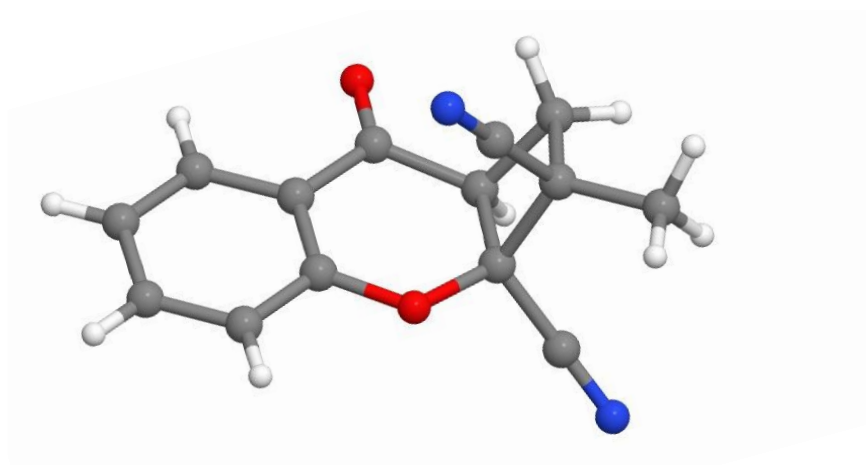

Crystal data

|                          |            |         |        |
|--------------------------|------------|---------|--------|
| Unit cell lengths (Å)    | 10.255     | 6.279   | 18.091 |
| Unit cell angles (deg)   | 90.000     | 100.081 | 90.000 |
| Space group Hall symbol  | -P 2yn     |         |        |
| Space group HM symbol    | P 1 21/n 1 |         |        |
| Crystal class            | Monoclinic |         |        |
| International tables #   | 14         |         |        |
| Space group multiplicity | 4          |         |        |

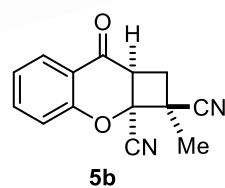

**Figure S7.** X-Ray crystal structure of compound **5b**, CCDC No. 2250465. The crystal structure data can be retrieved from the Cambridge Crystallographic Data Centre, [www.ccdc.cam.ac.uk](http://www.ccdc.cam.ac.uk).



## 7 NMR spectra

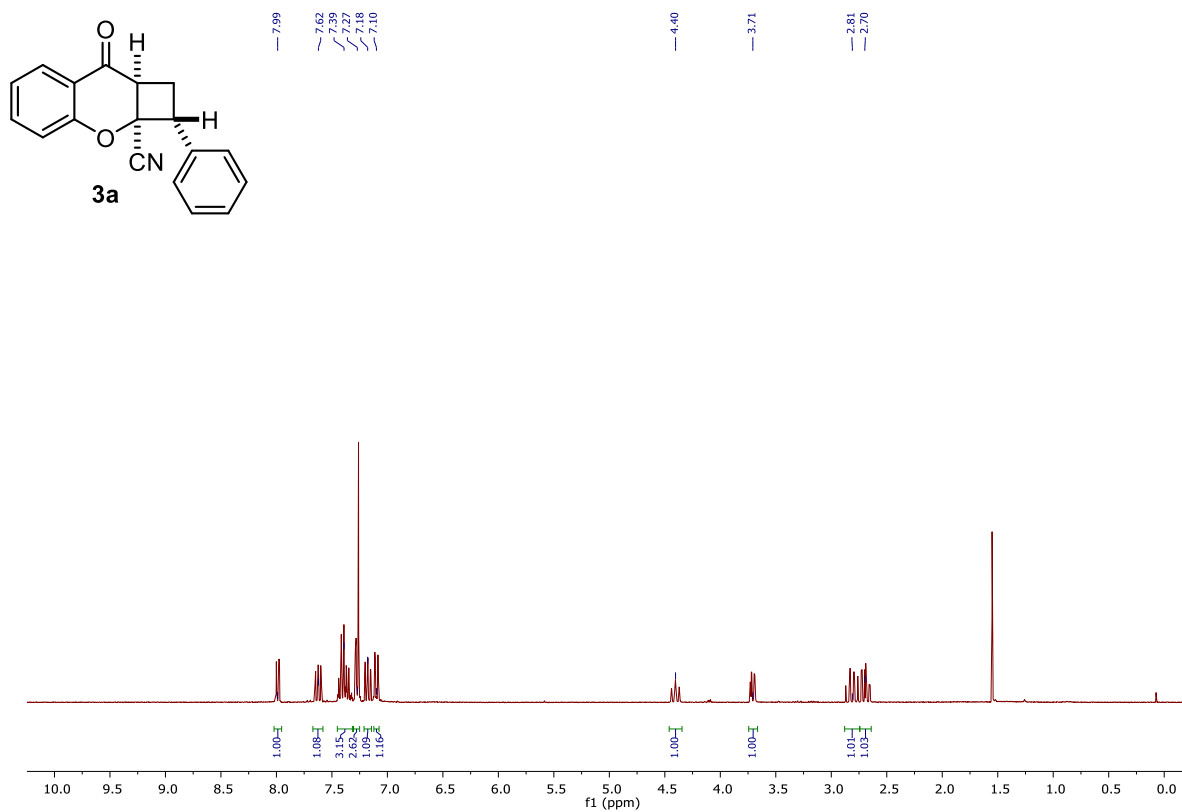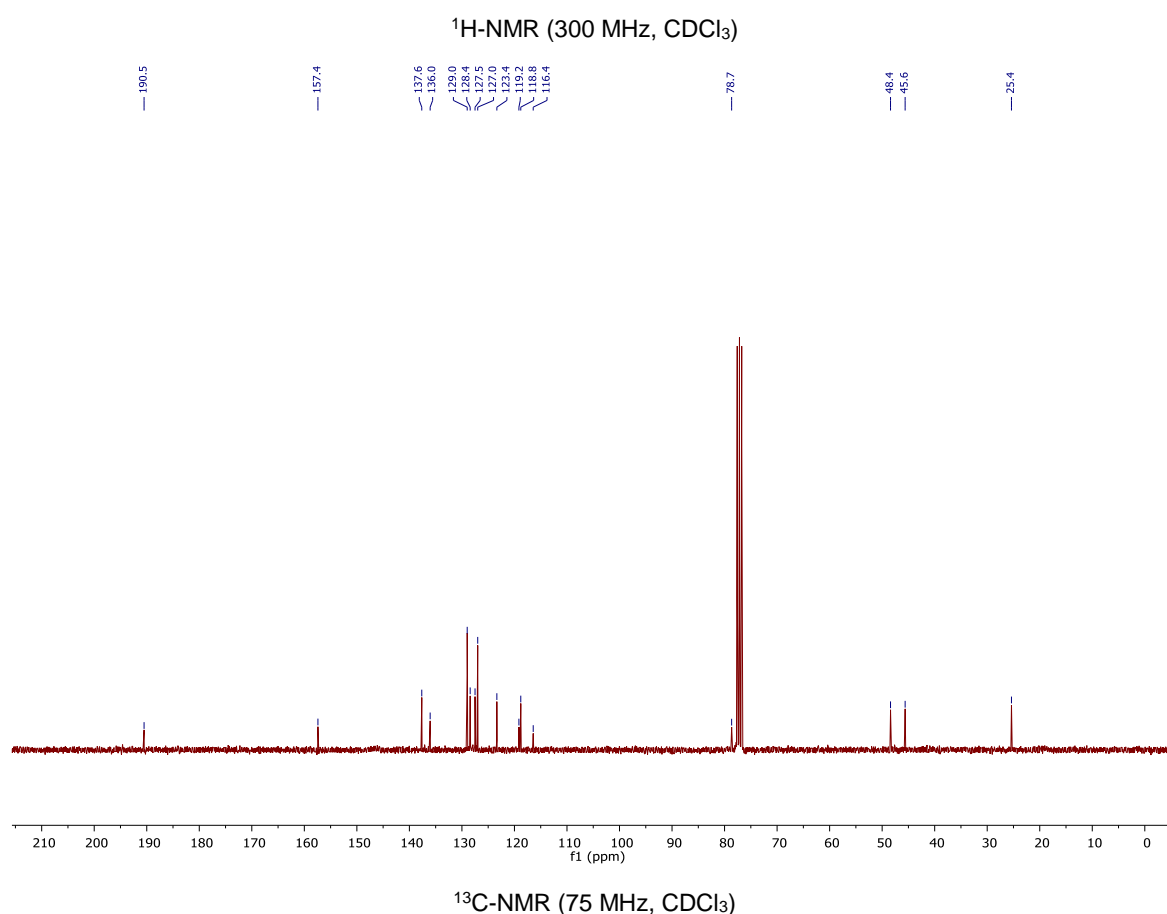

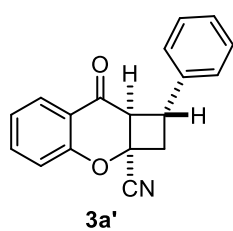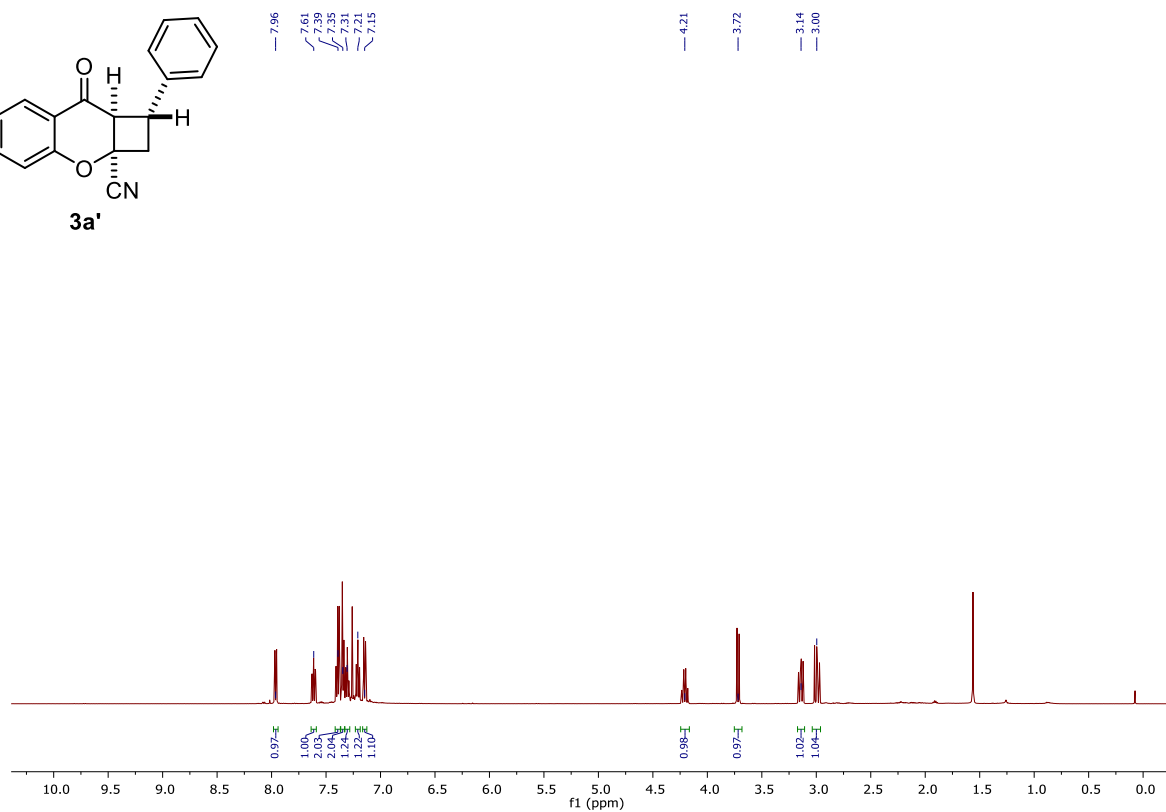

<sup>1</sup>H-NMR (500 MHz, CDCl<sub>3</sub>)

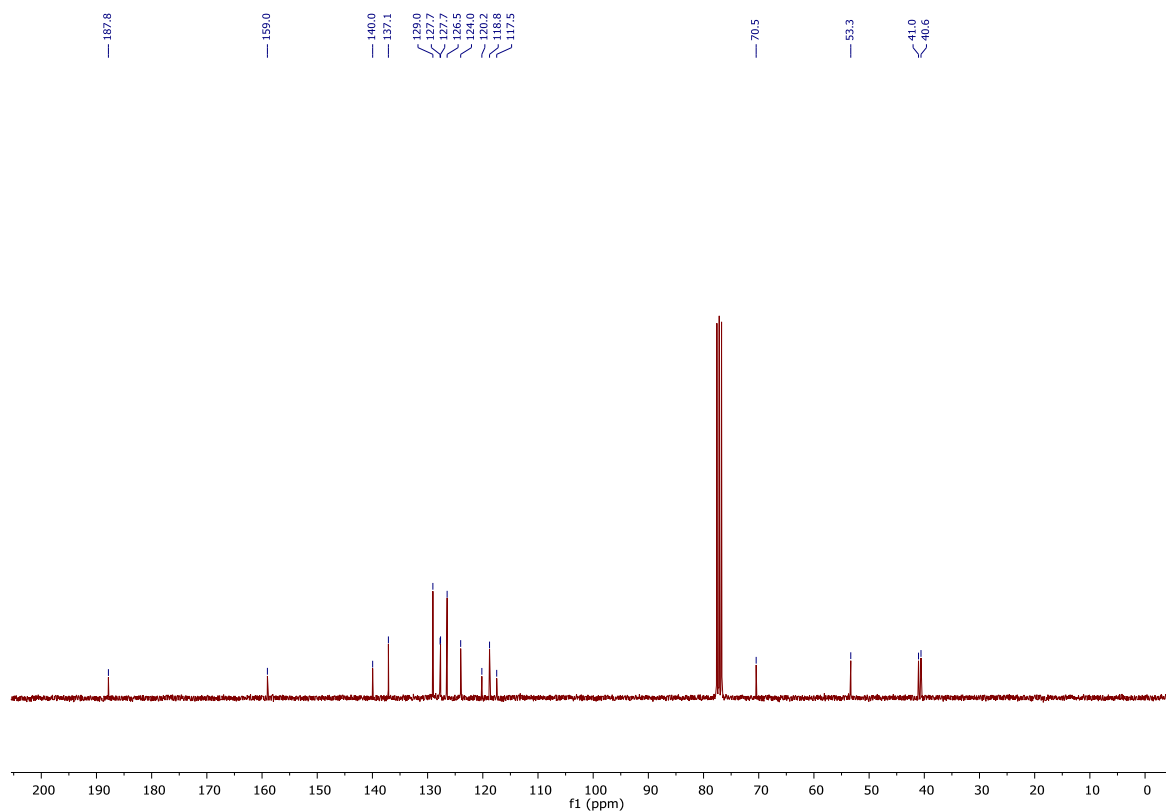

<sup>13</sup>C-NMR (75 MHz, CDCl<sub>3</sub>)

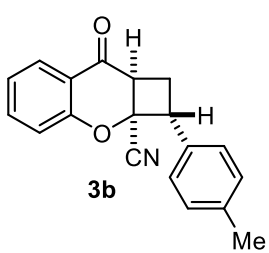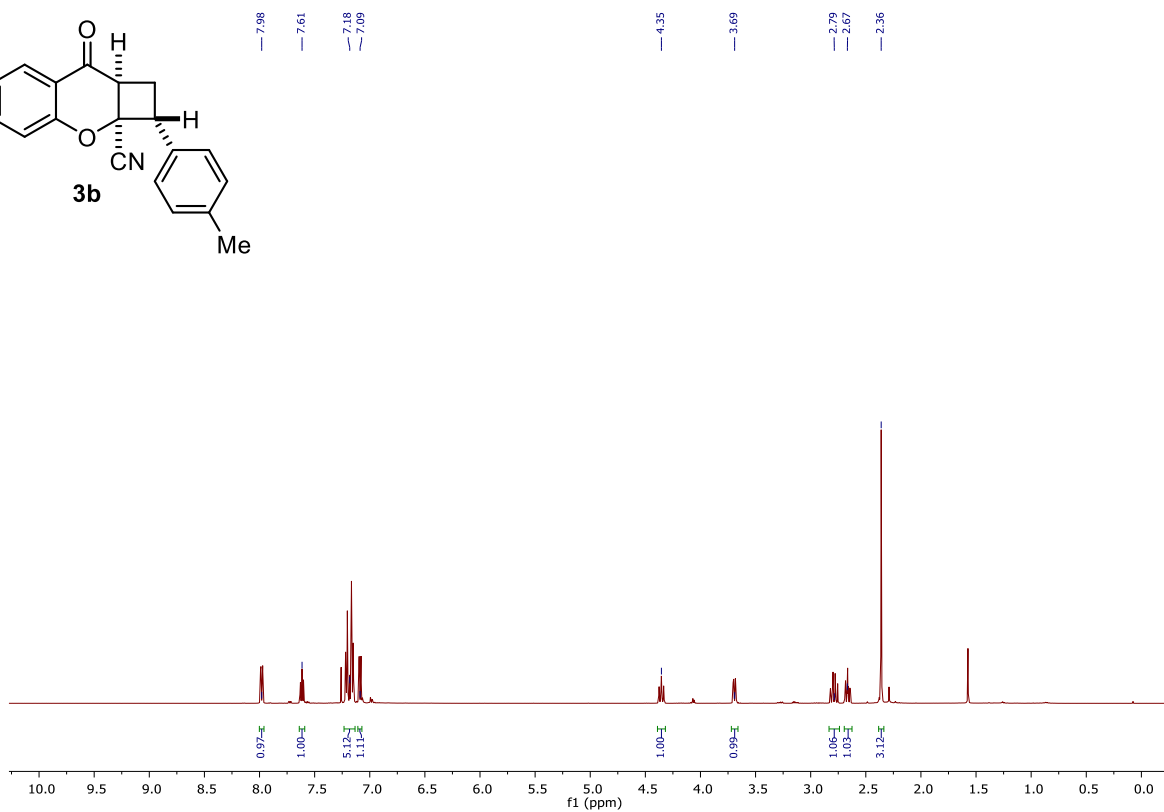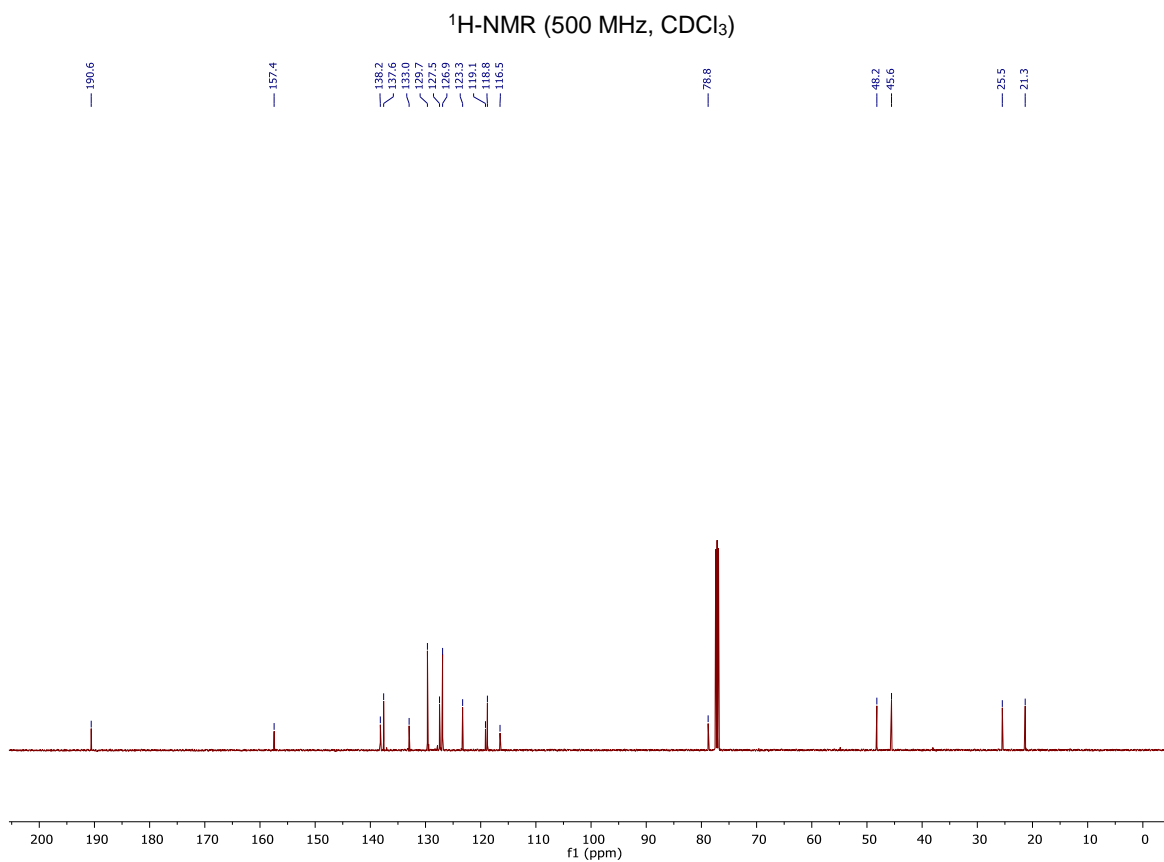

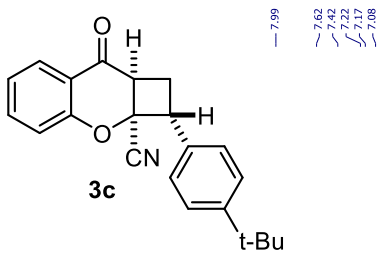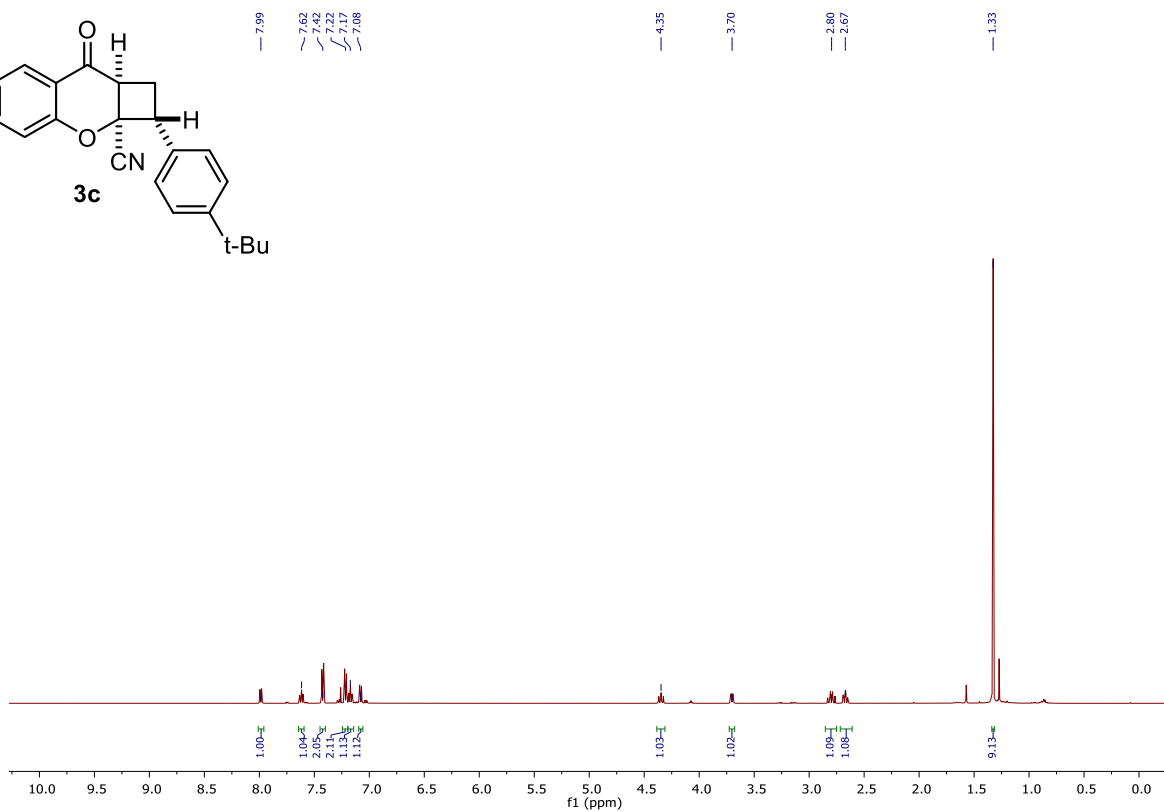

<sup>1</sup>H-NMR (500 MHz, CDCl<sub>3</sub>)

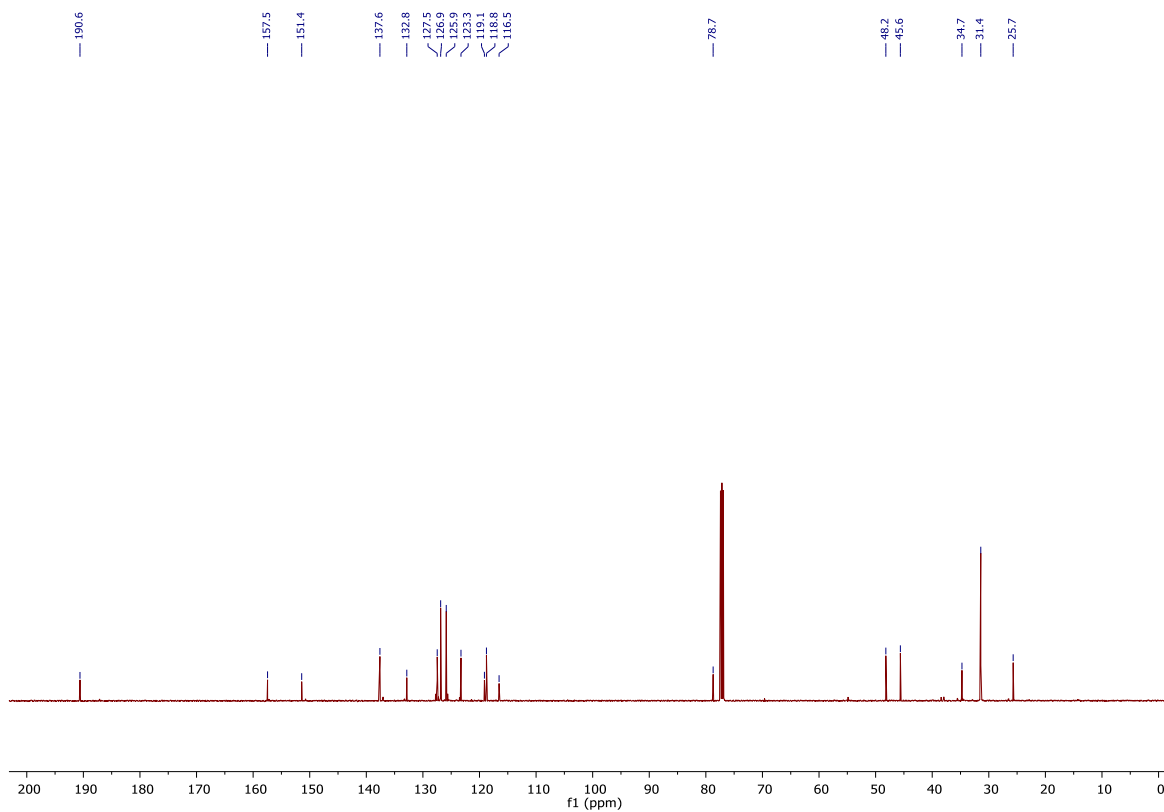

<sup>13</sup>C-NMR (126 MHz, CDCl<sub>3</sub>)

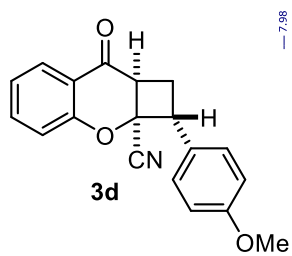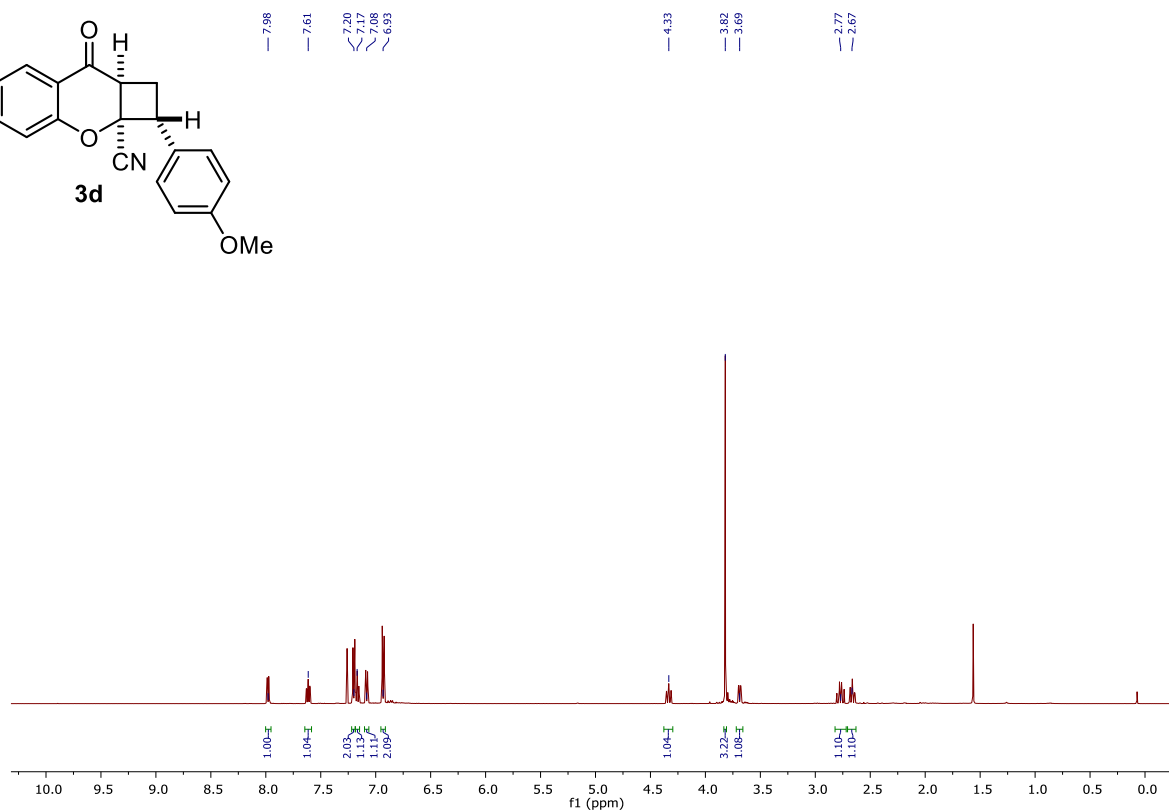

<sup>1</sup>H-NMR (500 MHz, CDCl<sub>3</sub>)

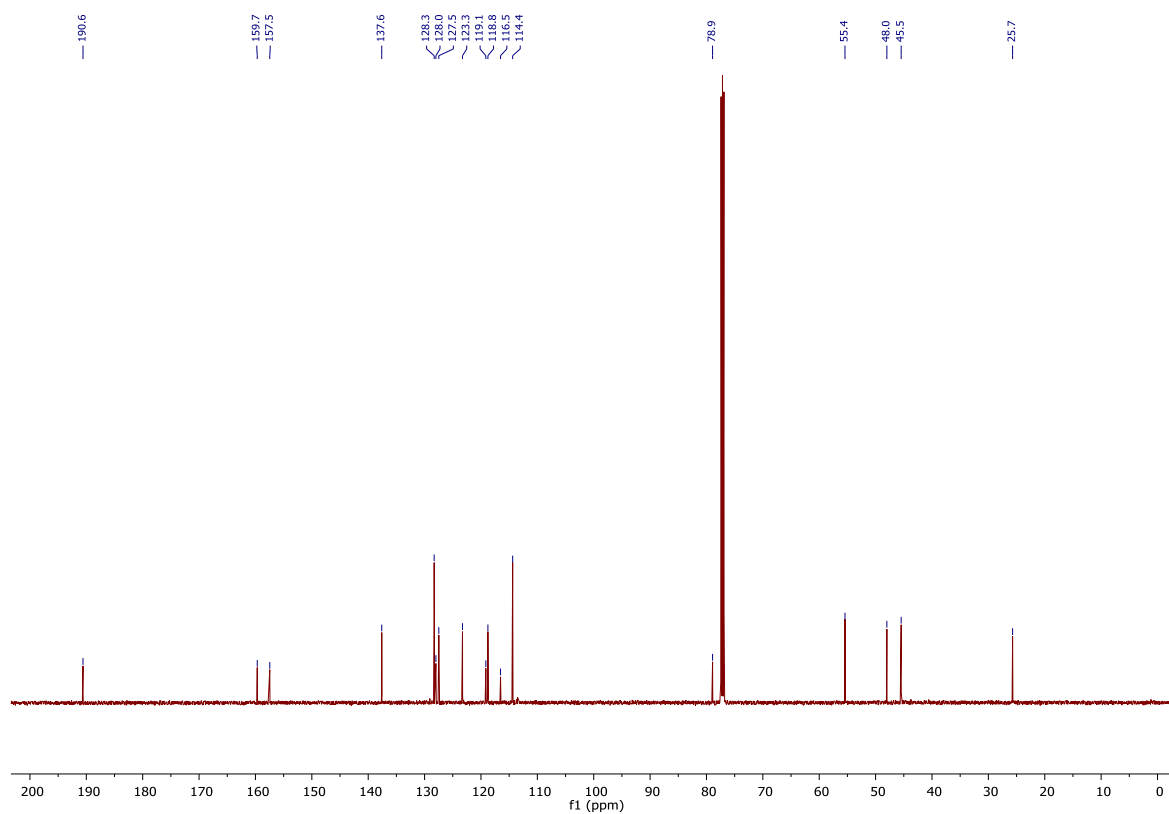

<sup>13</sup>C-NMR (126 MHz, CDCl<sub>3</sub>)

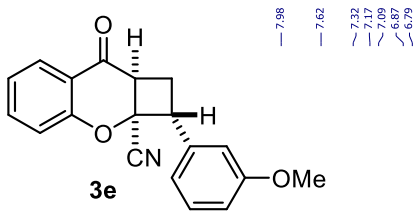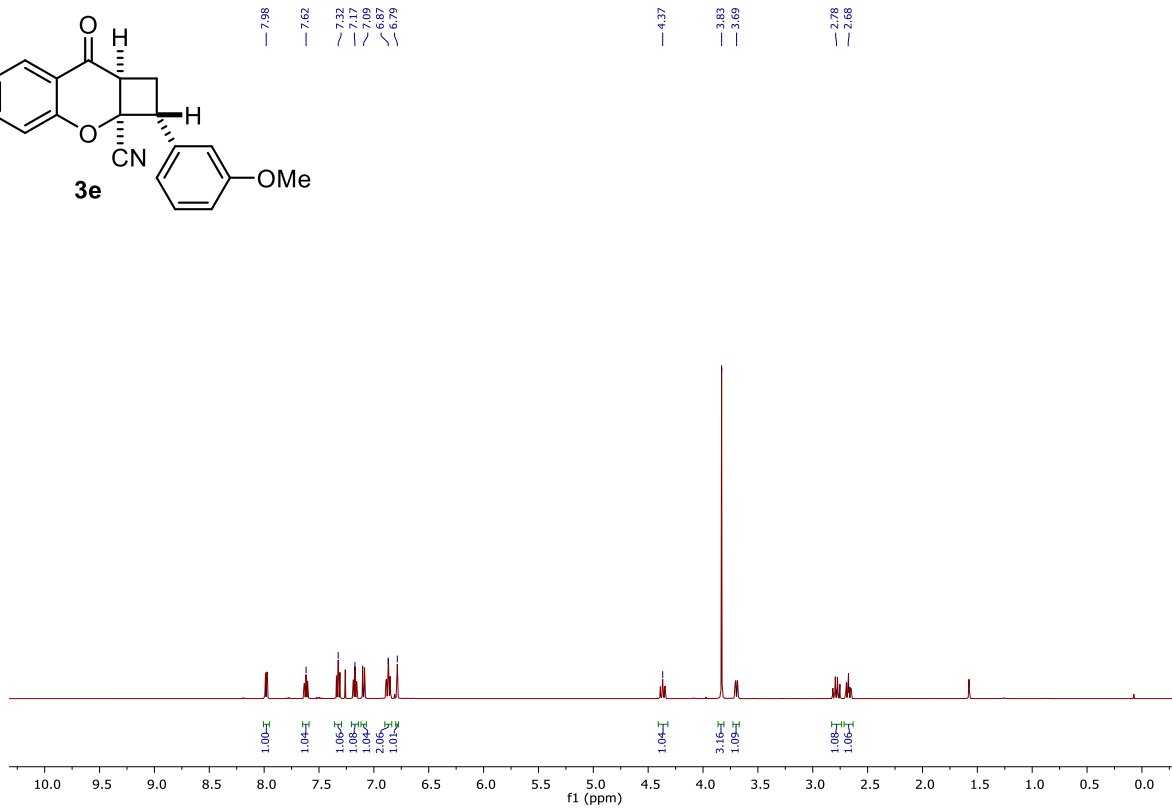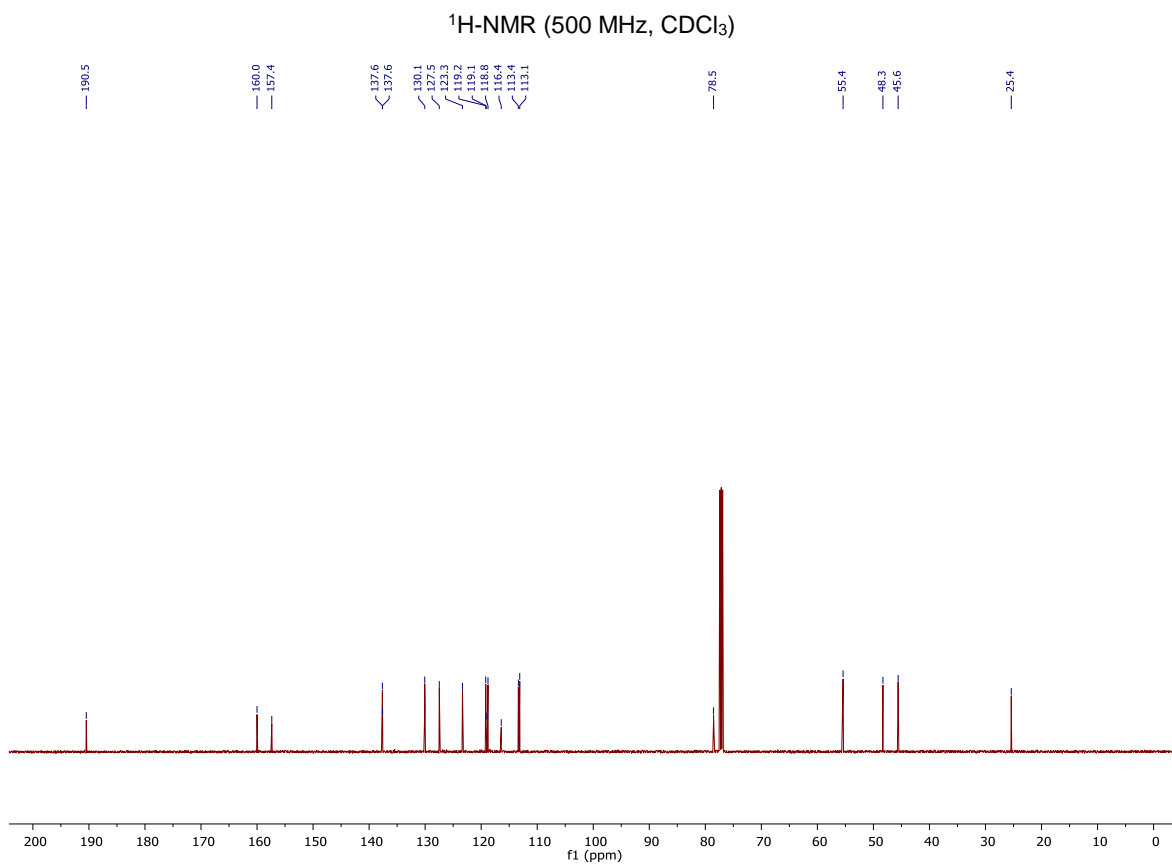

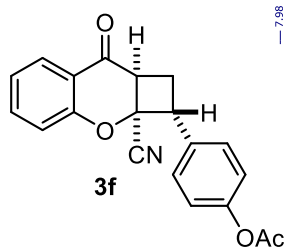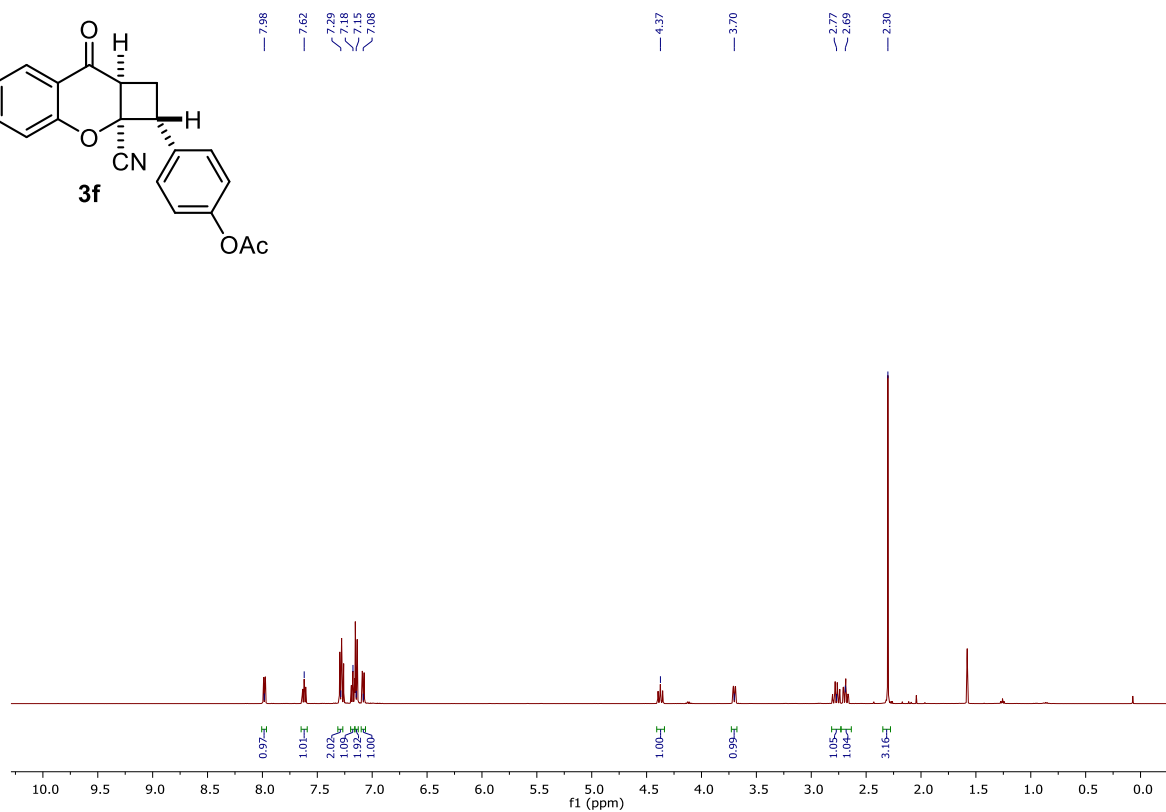

<sup>1</sup>H-NMR (500 MHz, CDCl<sub>3</sub>)

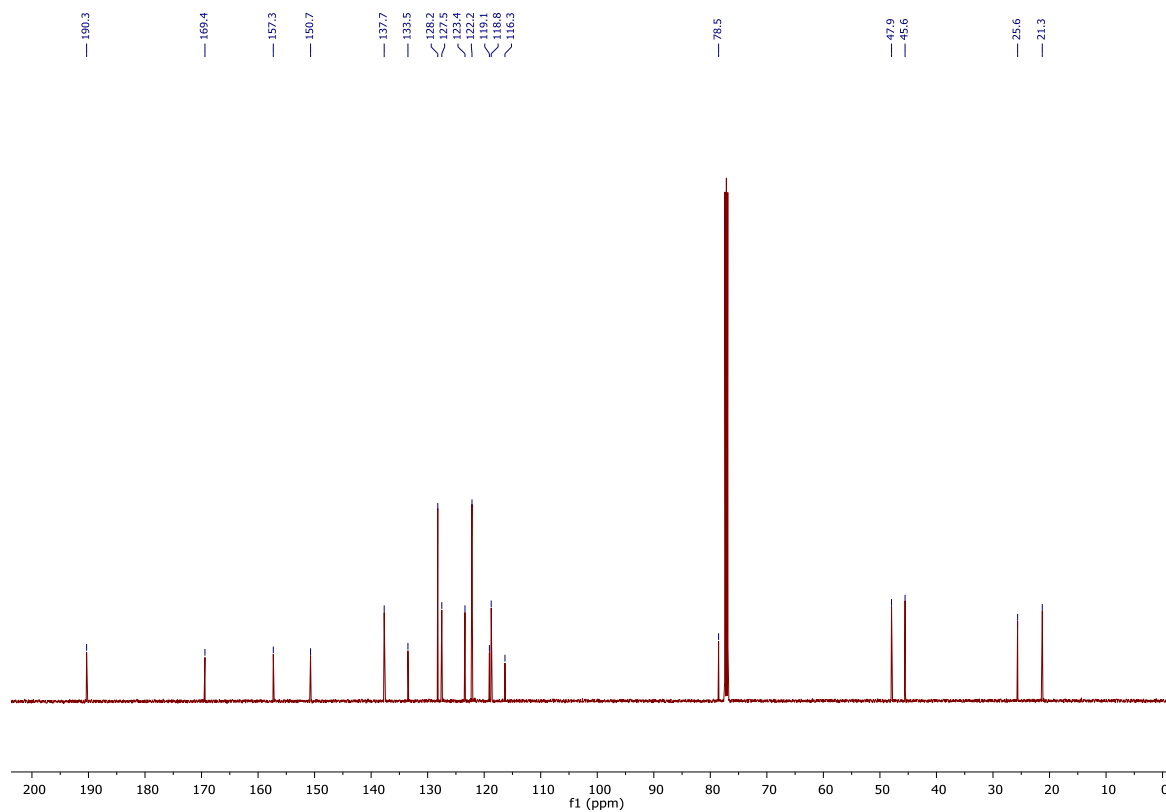

<sup>13</sup>C-NMR (126 MHz, CDCl<sub>3</sub>)

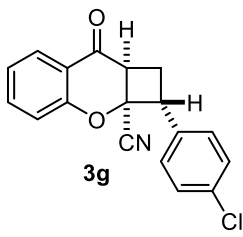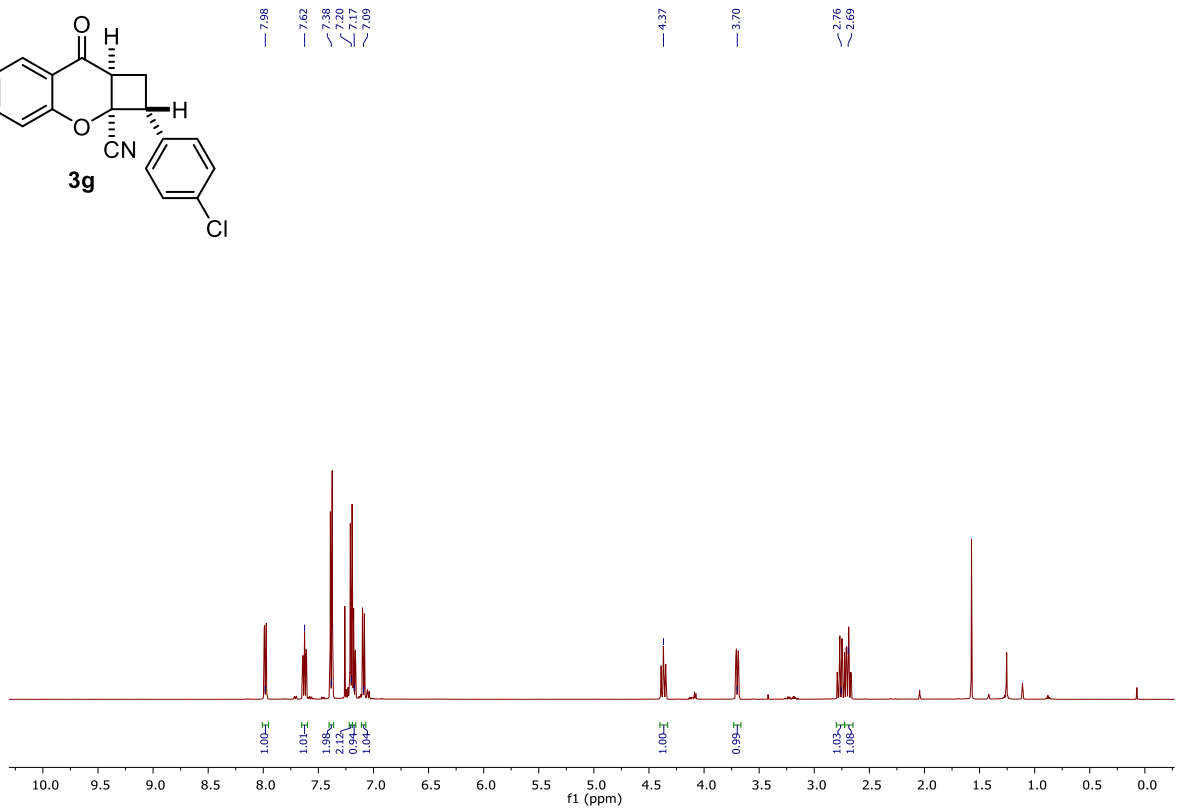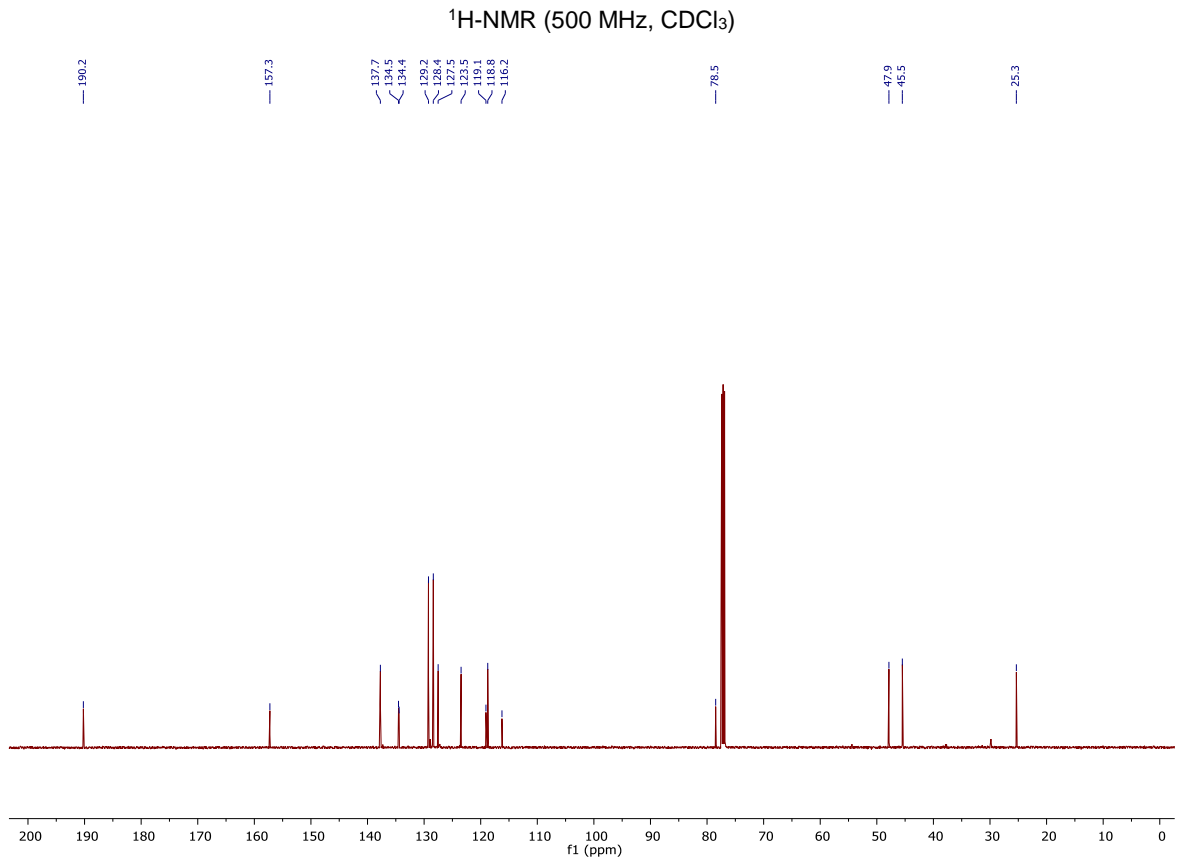



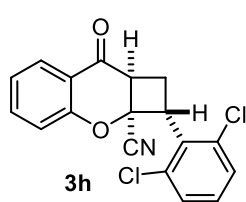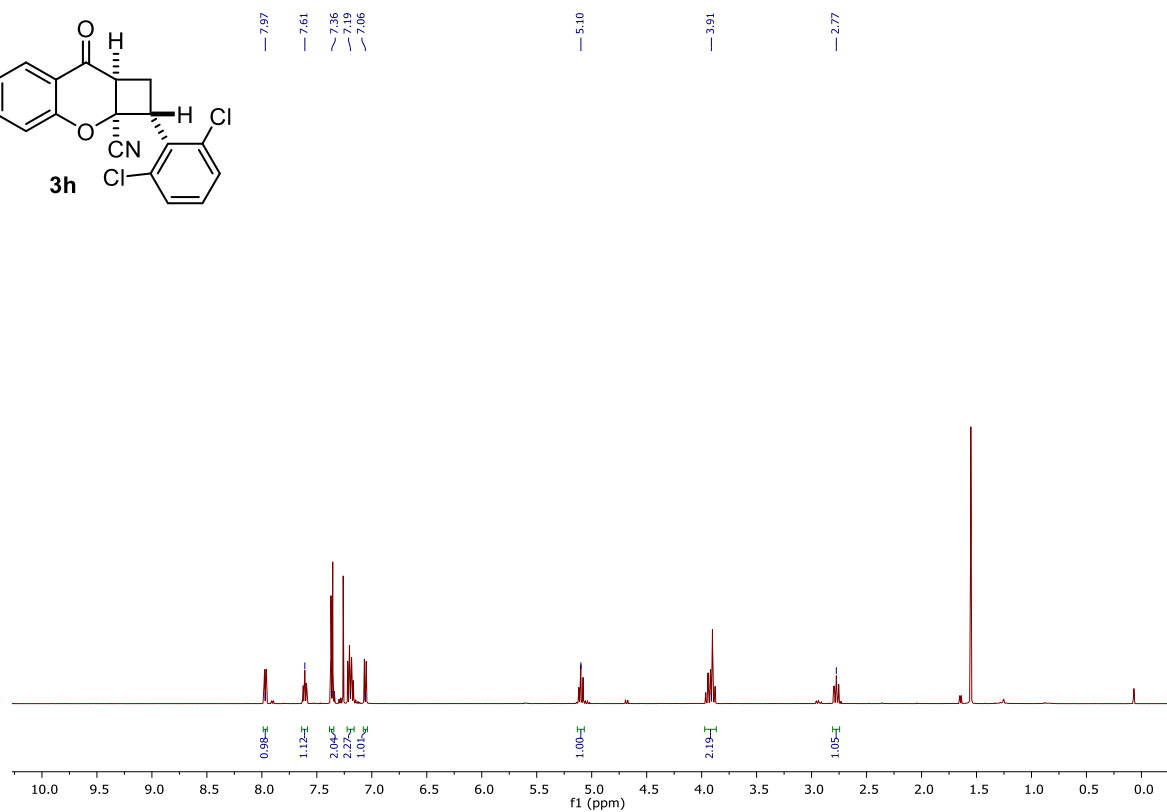

<sup>1</sup>H-NMR (500 MHz, CDCl<sub>3</sub>)

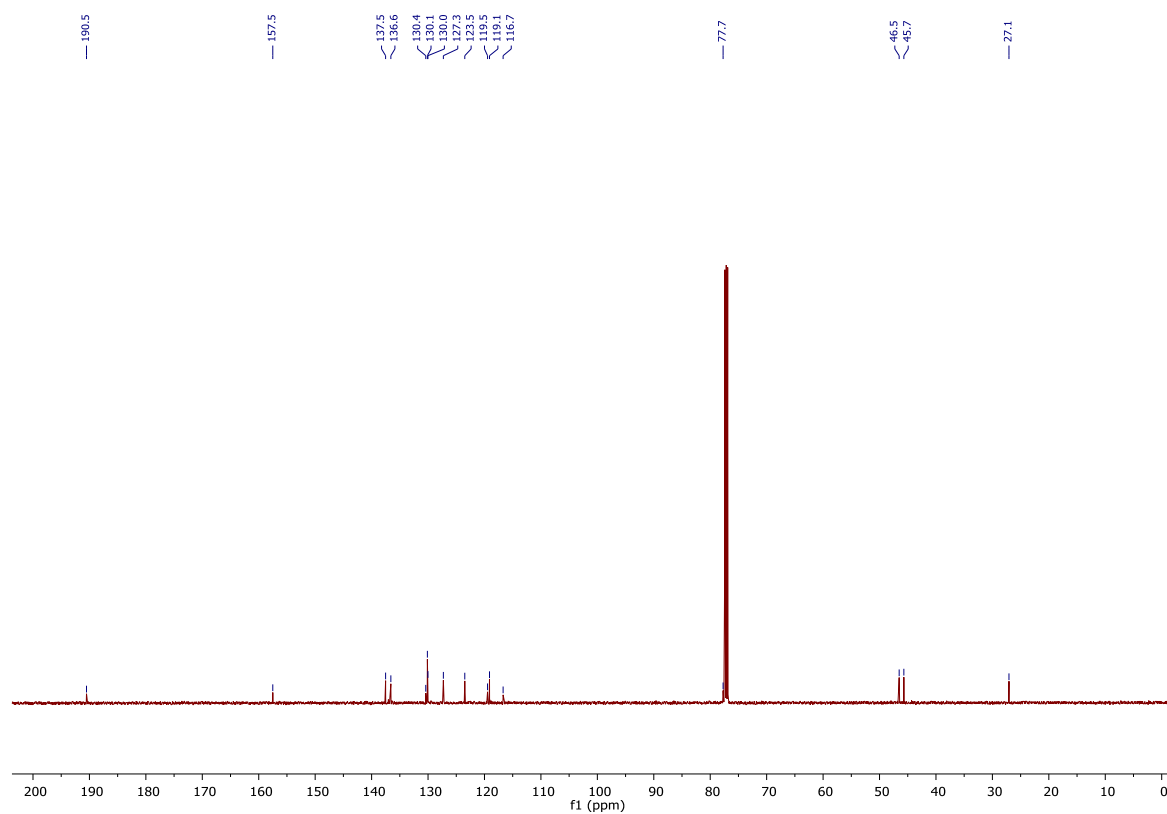

<sup>13</sup>C-NMR (126 MHz, CDCl<sub>3</sub>)

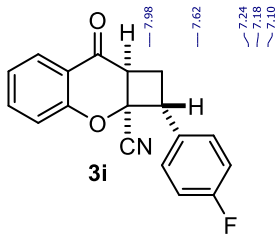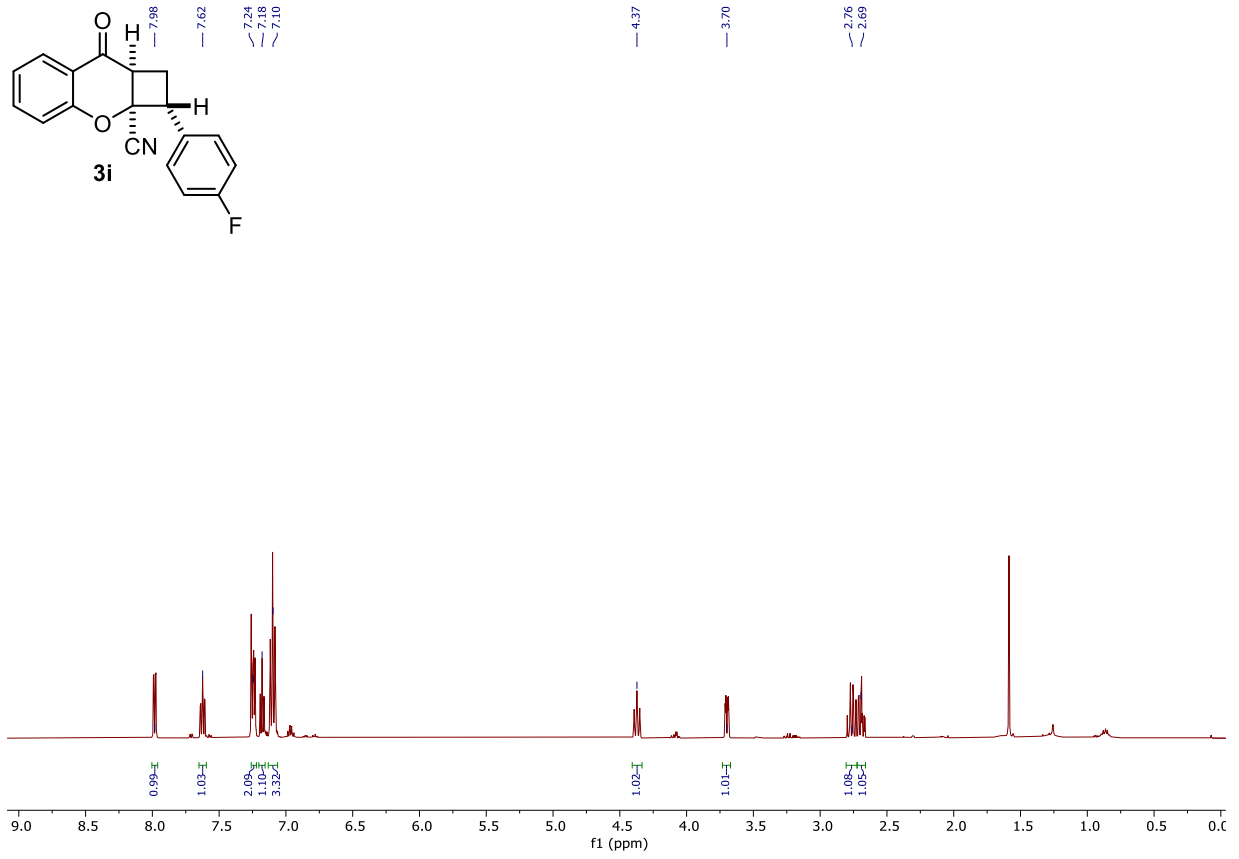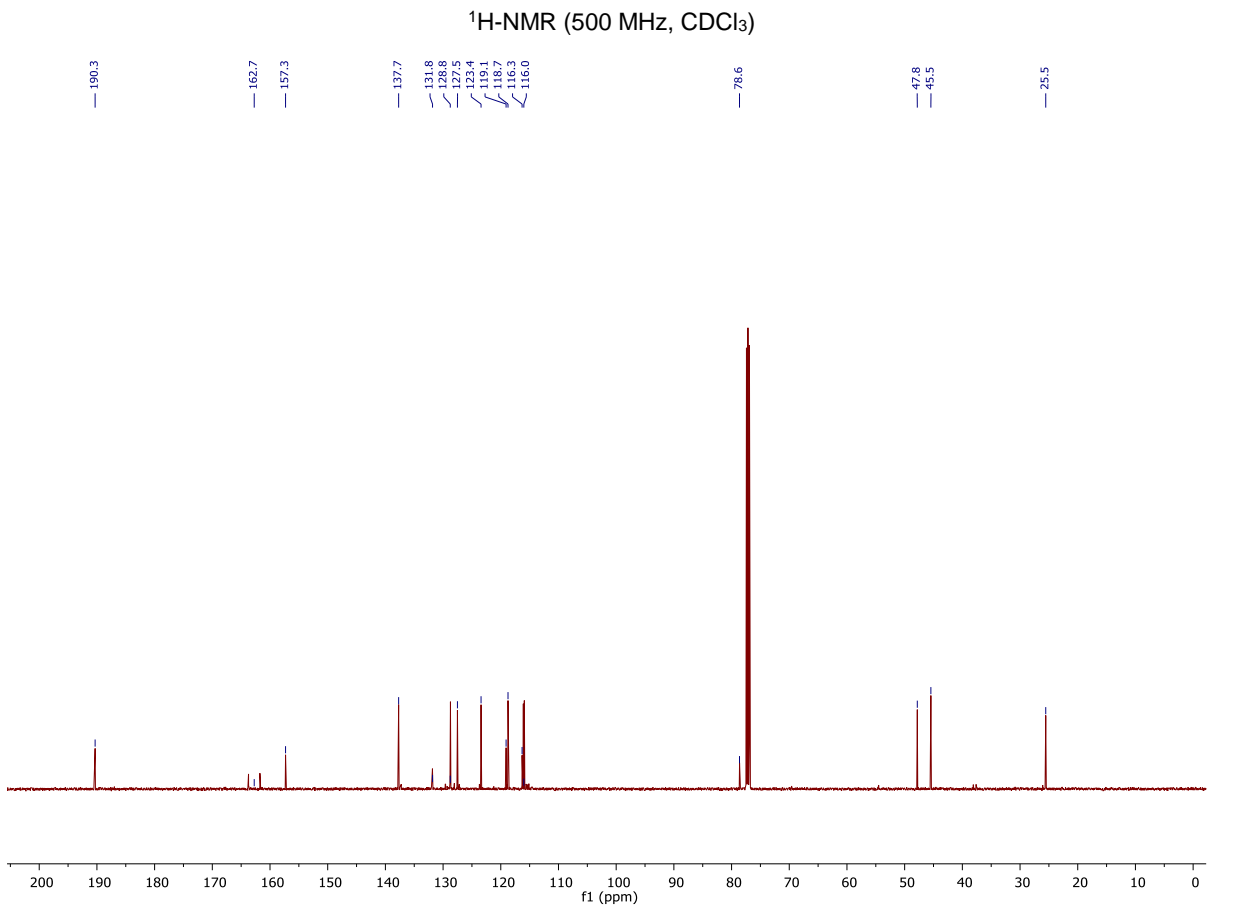

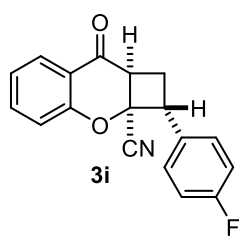

-113.43

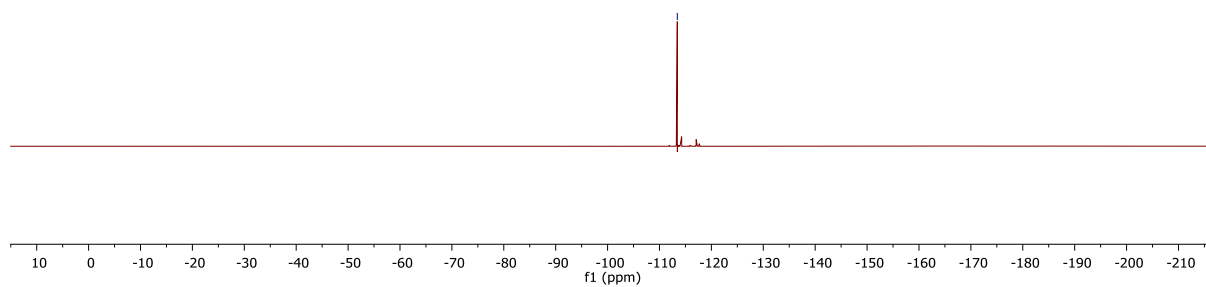

$^{19}\text{F}$ -NMR (282 MHz,  $\text{CDCl}_3$ )

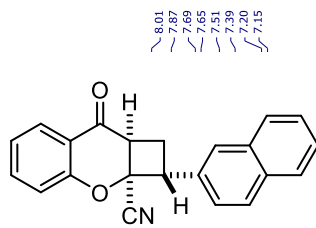

**3j**  
+ regioisomer

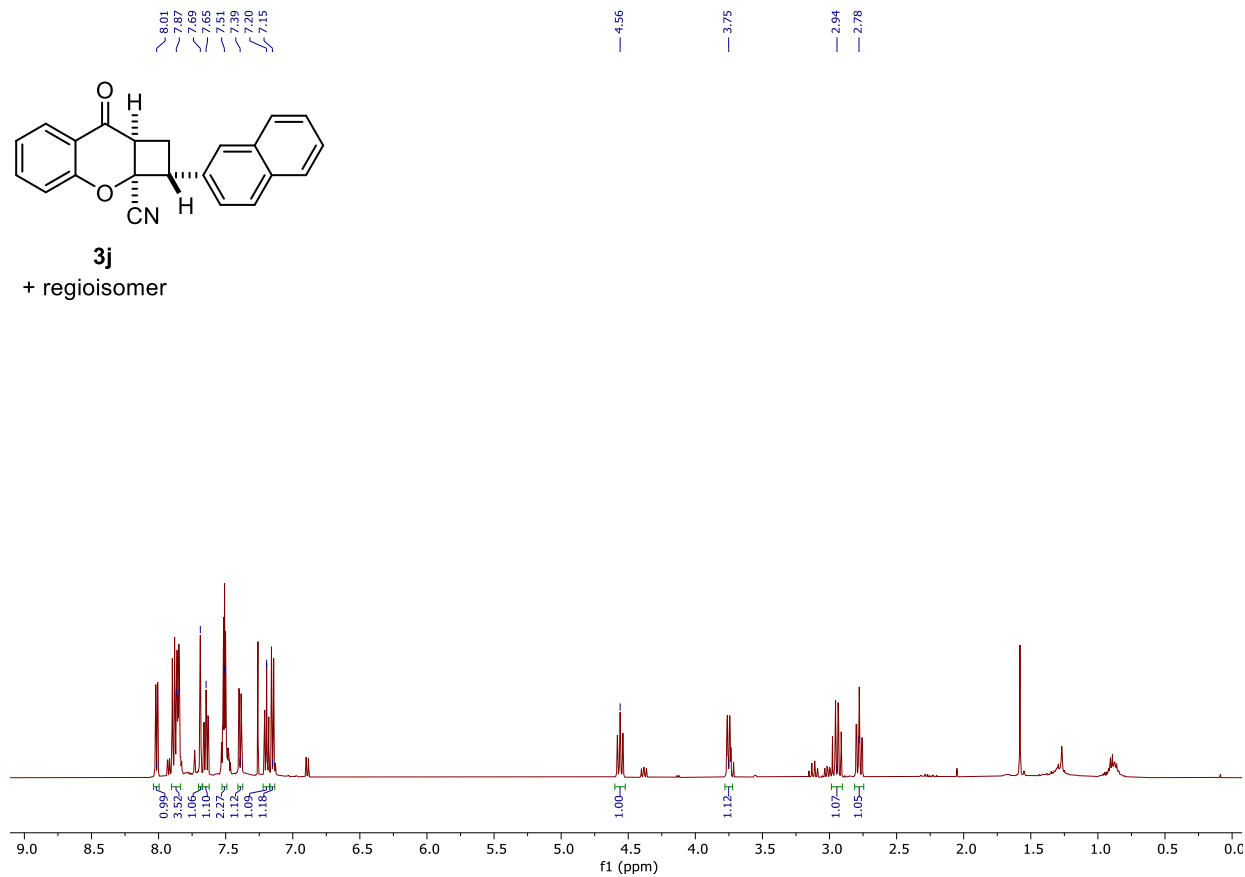

$^1\text{H-NMR}$  (500 MHz,  $\text{CDCl}_3$ )

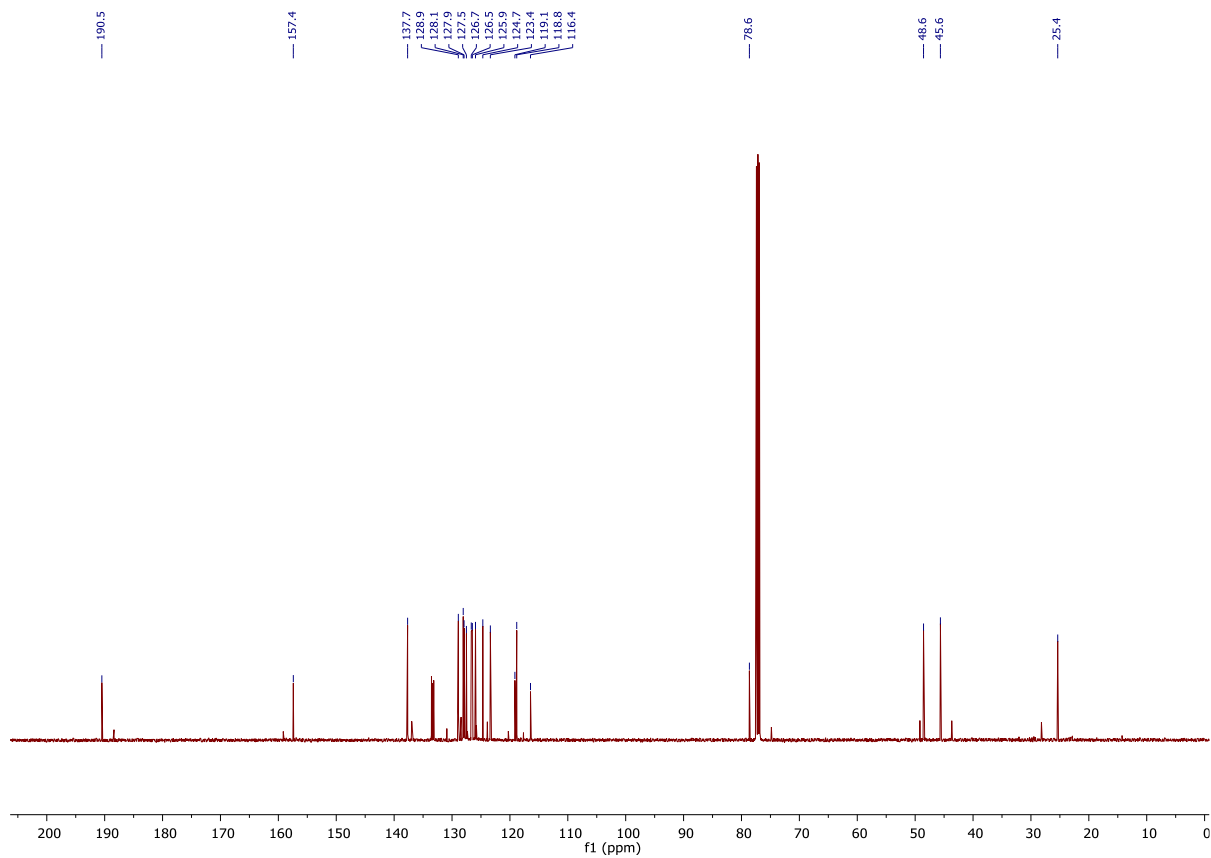

$^{13}\text{C-NMR}$  (126 MHz,  $\text{CDCl}_3$ )

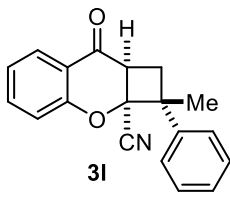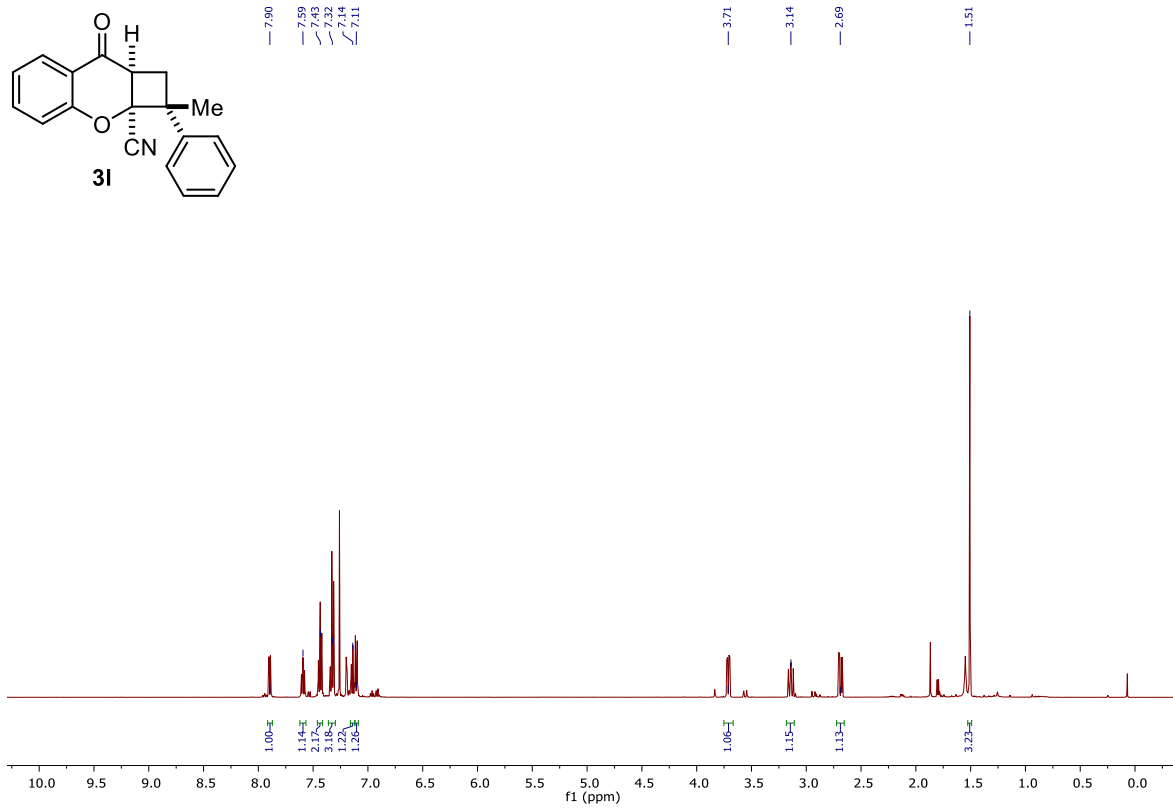

<sup>1</sup>H-NMR (500 MHz, CDCl<sub>3</sub>)

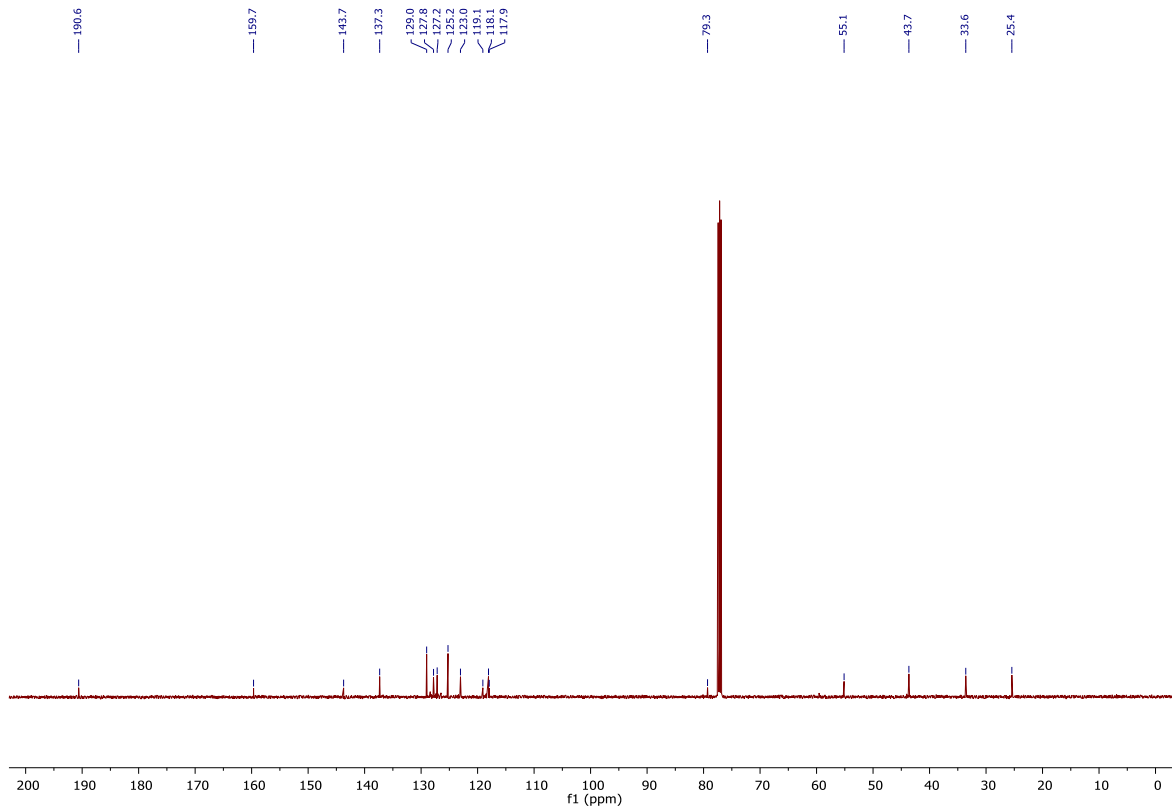

<sup>13</sup>C-NMR (126 MHz, CDCl<sub>3</sub>)

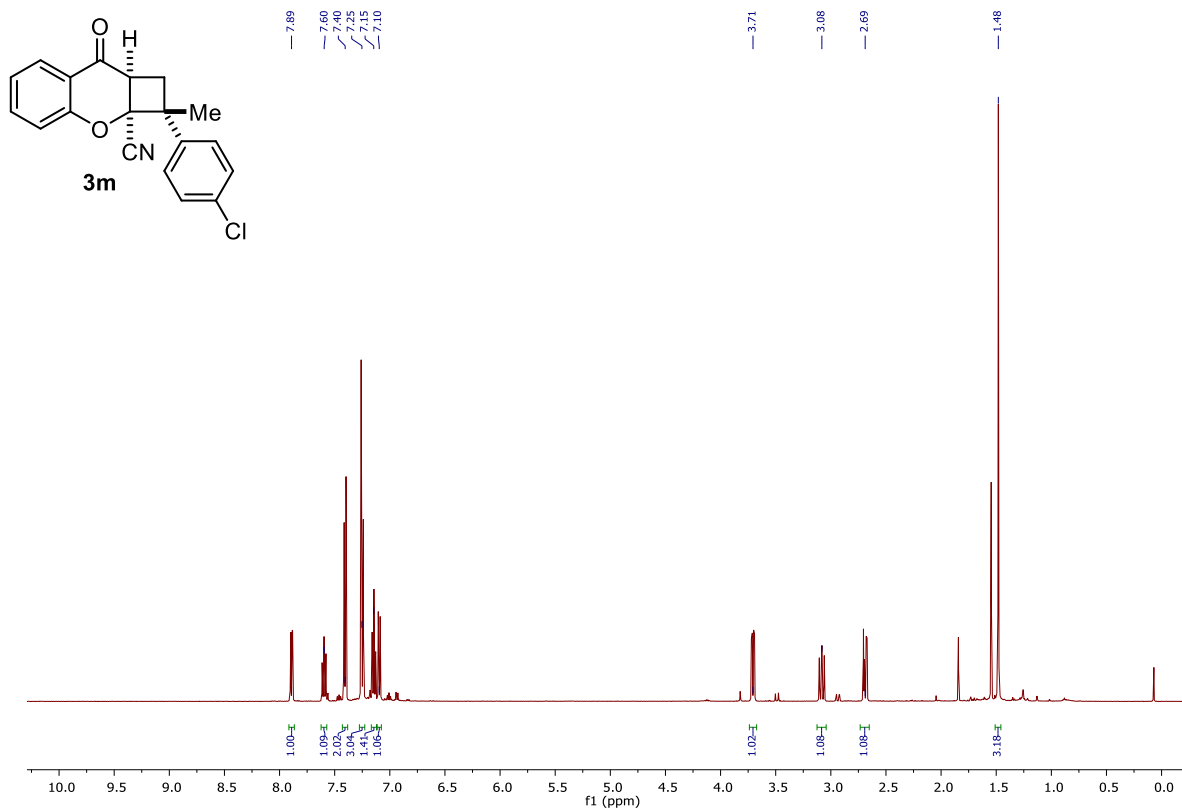

<sup>1</sup>H-NMR (500 MHz, CDCl<sub>3</sub>)

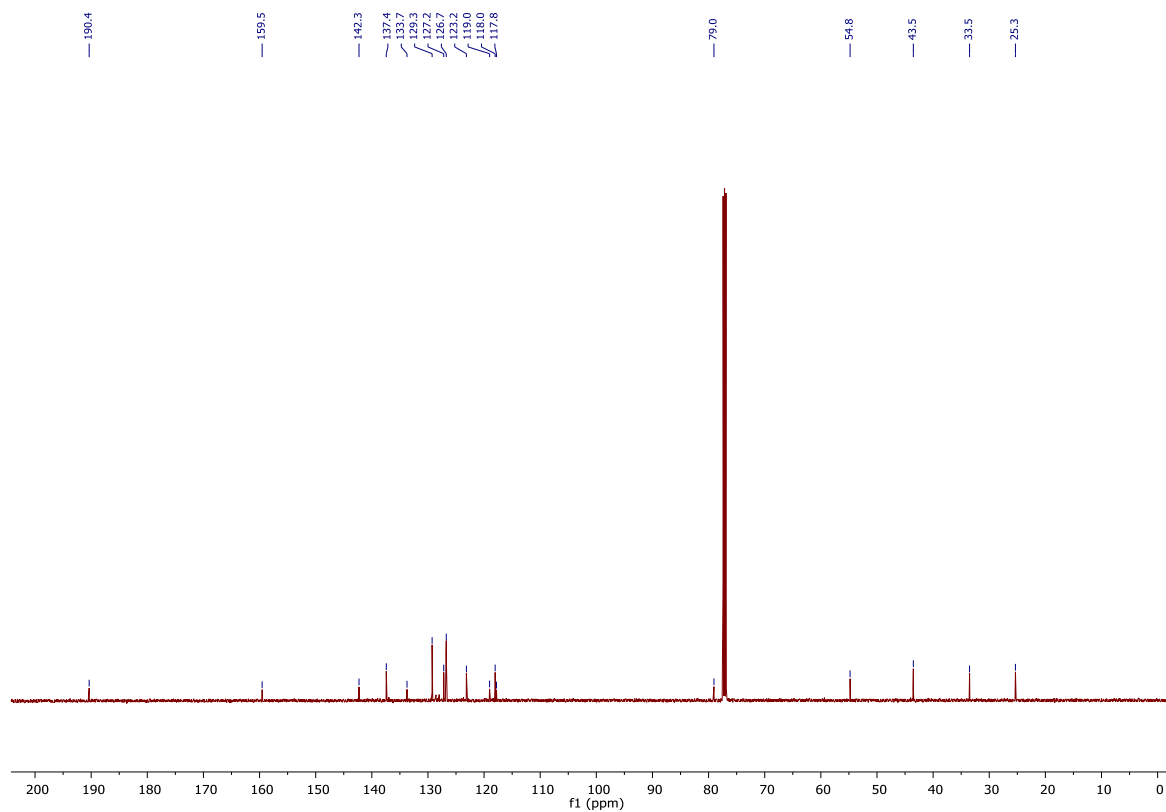

<sup>13</sup>C-NMR (126 MHz, CDCl<sub>3</sub>)

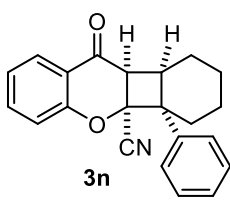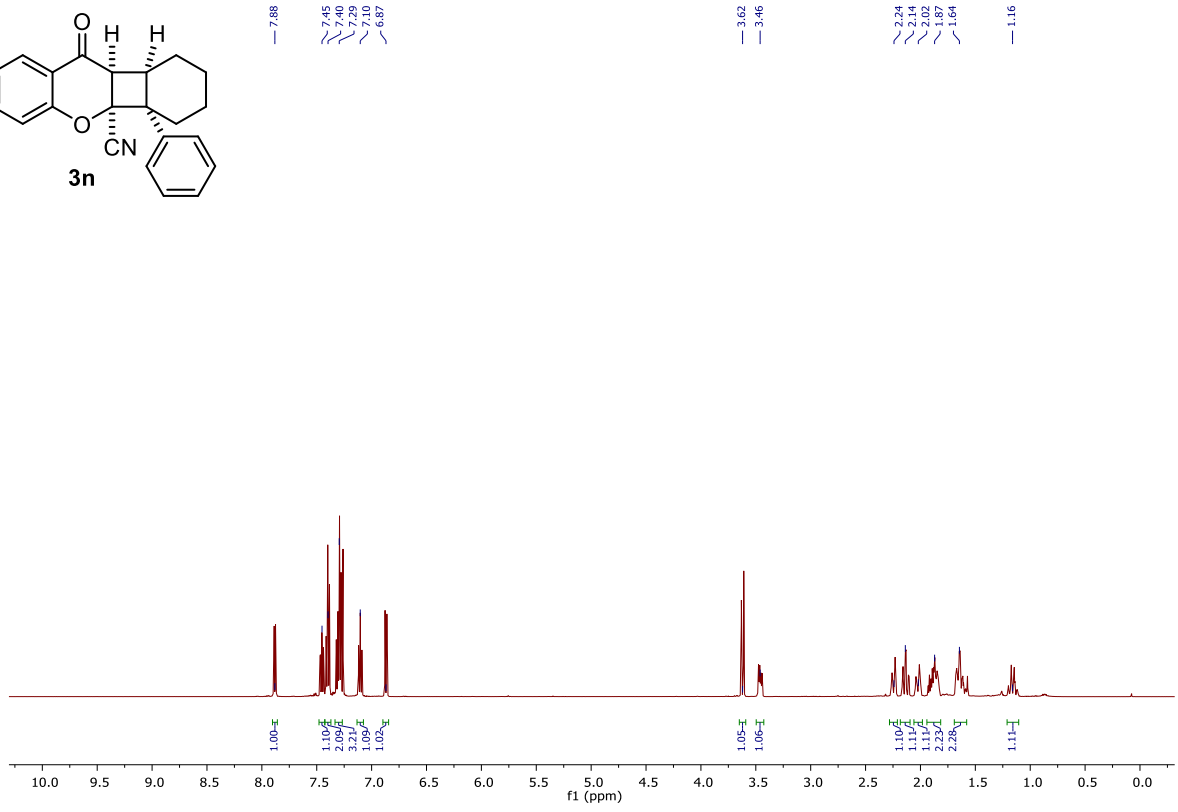

<sup>1</sup>H-NMR (500 MHz, CDCl<sub>3</sub>)

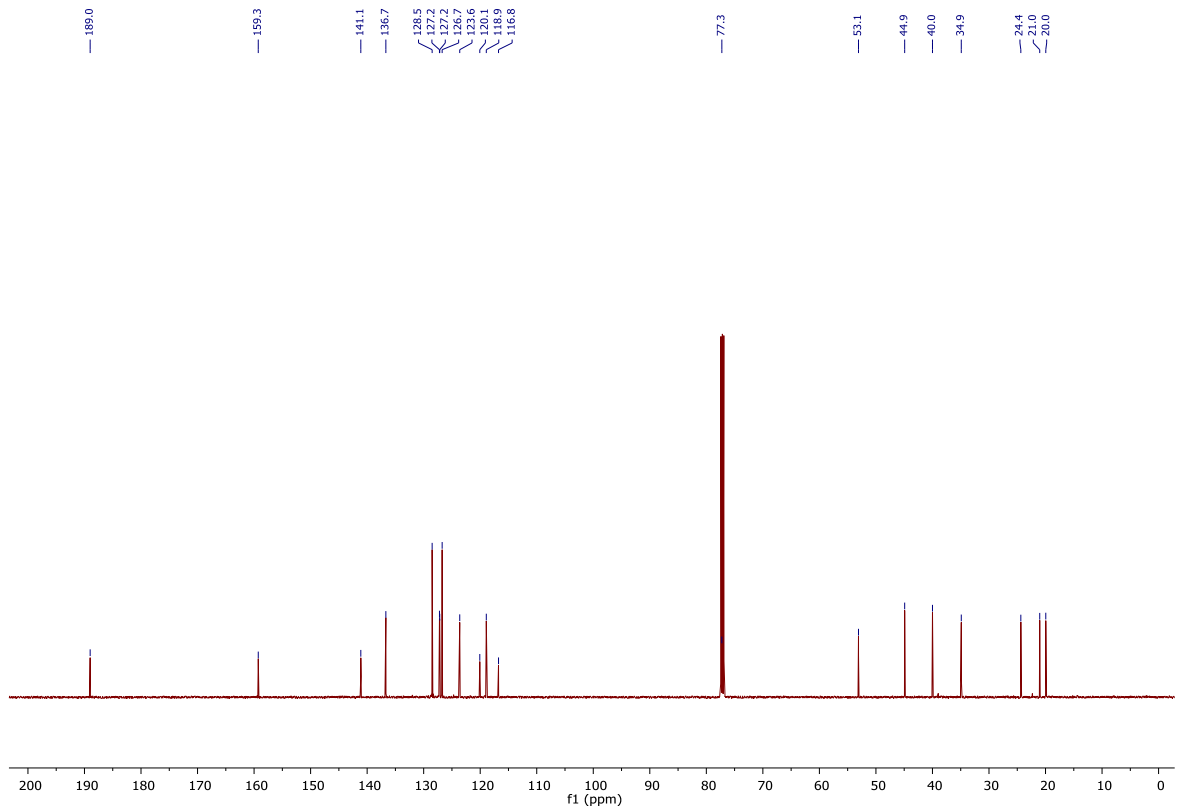

<sup>13</sup>C-NMR (126 MHz, CDCl<sub>3</sub>)

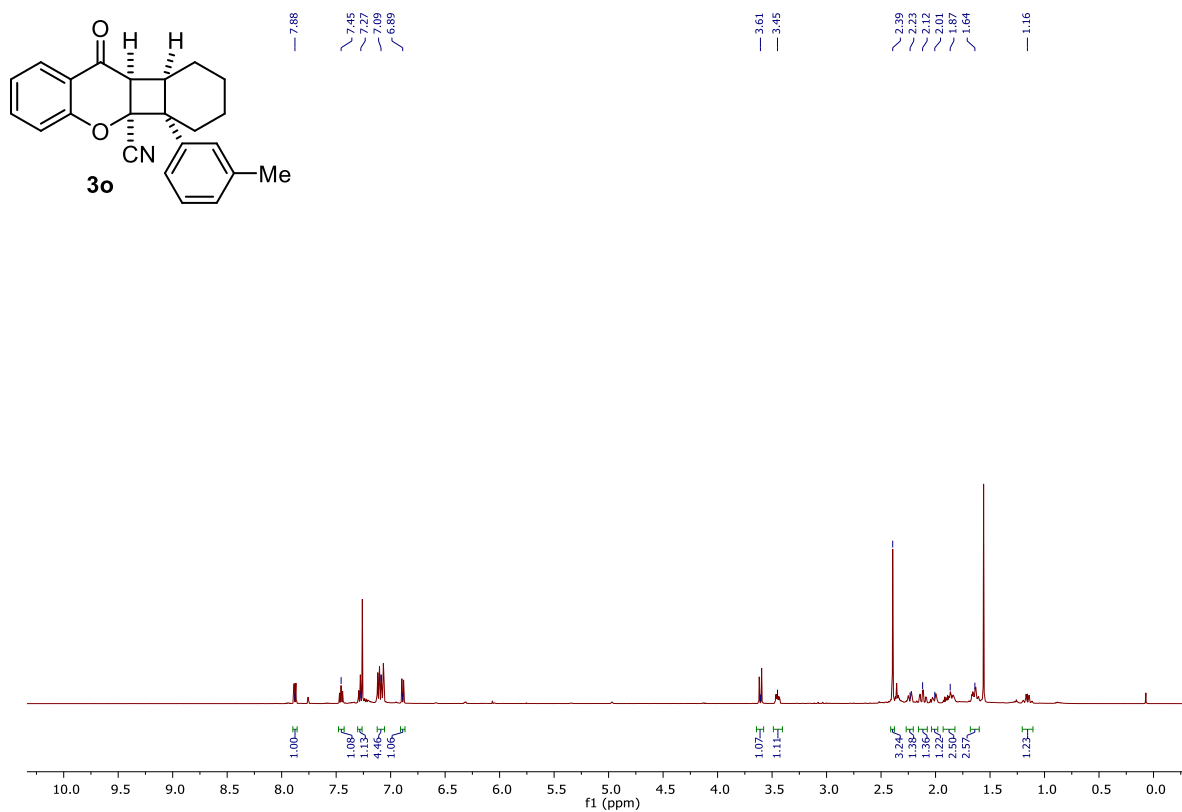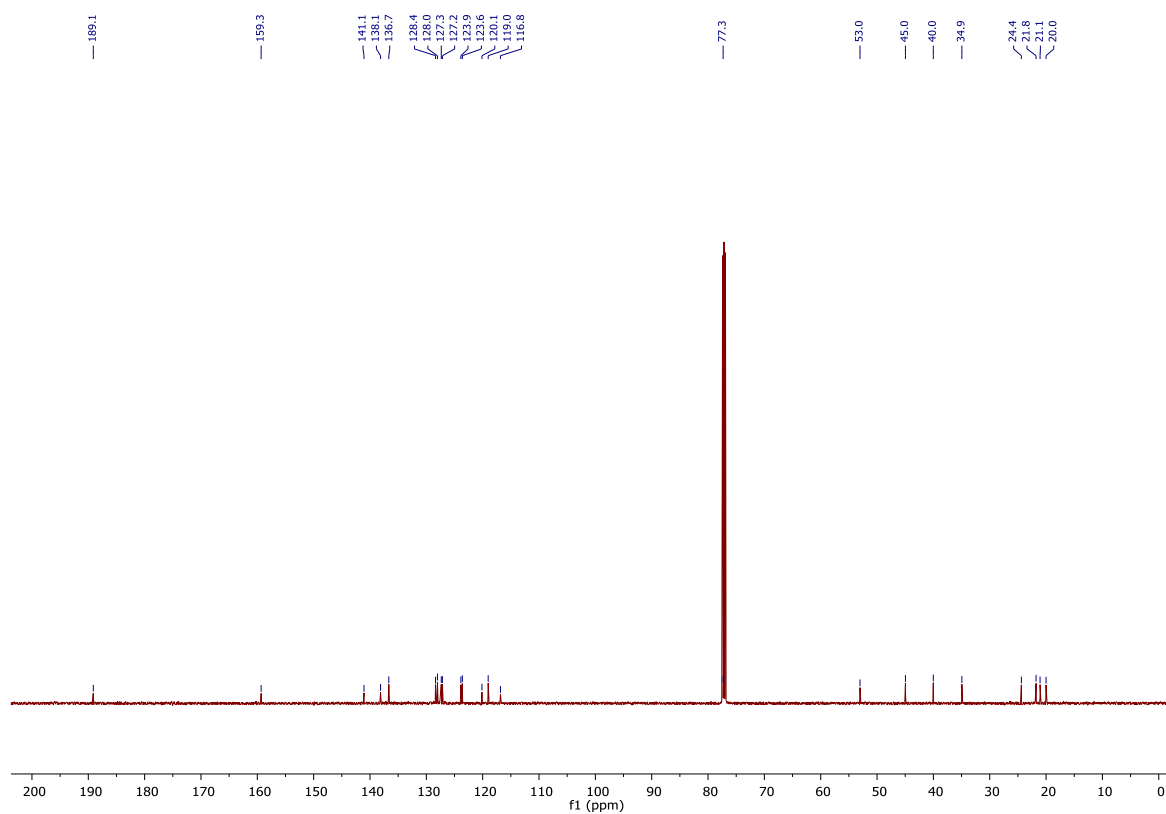



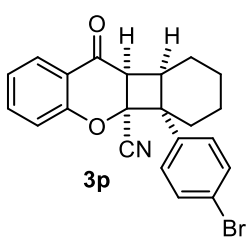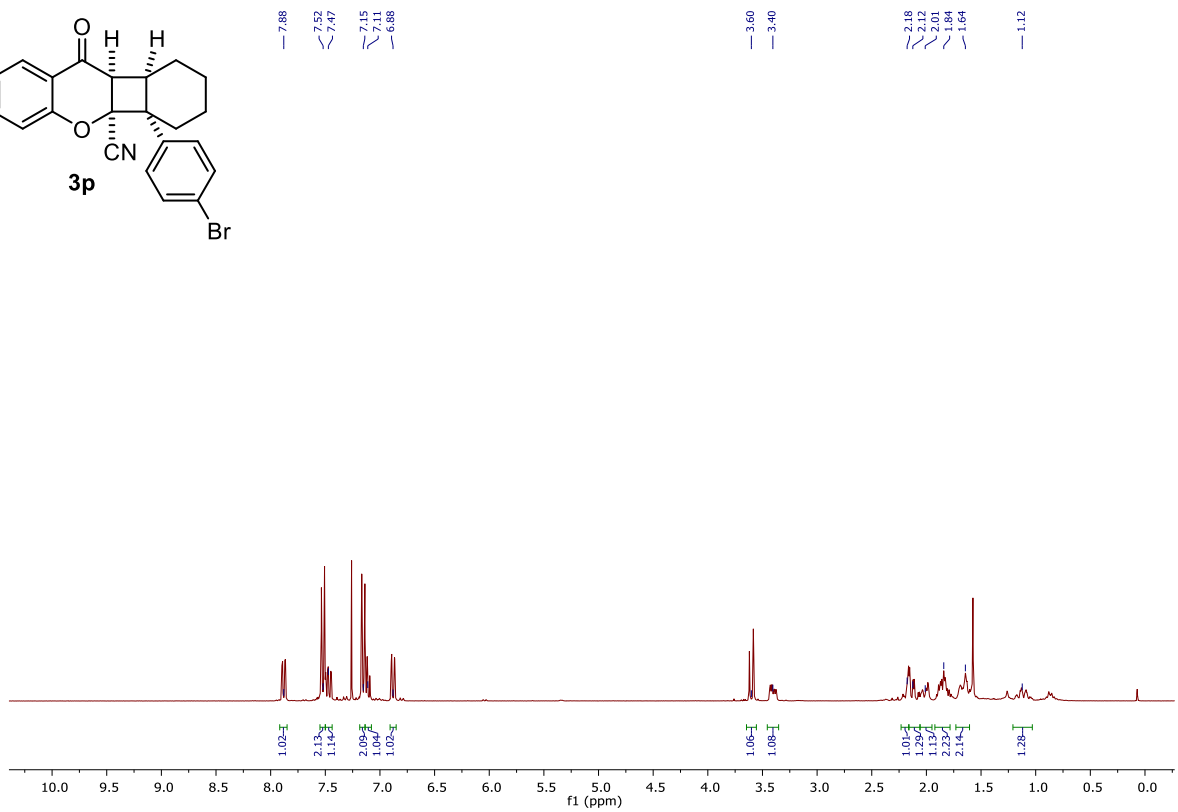

<sup>1</sup>H-NMR (500 MHz, CDCl<sub>3</sub>)

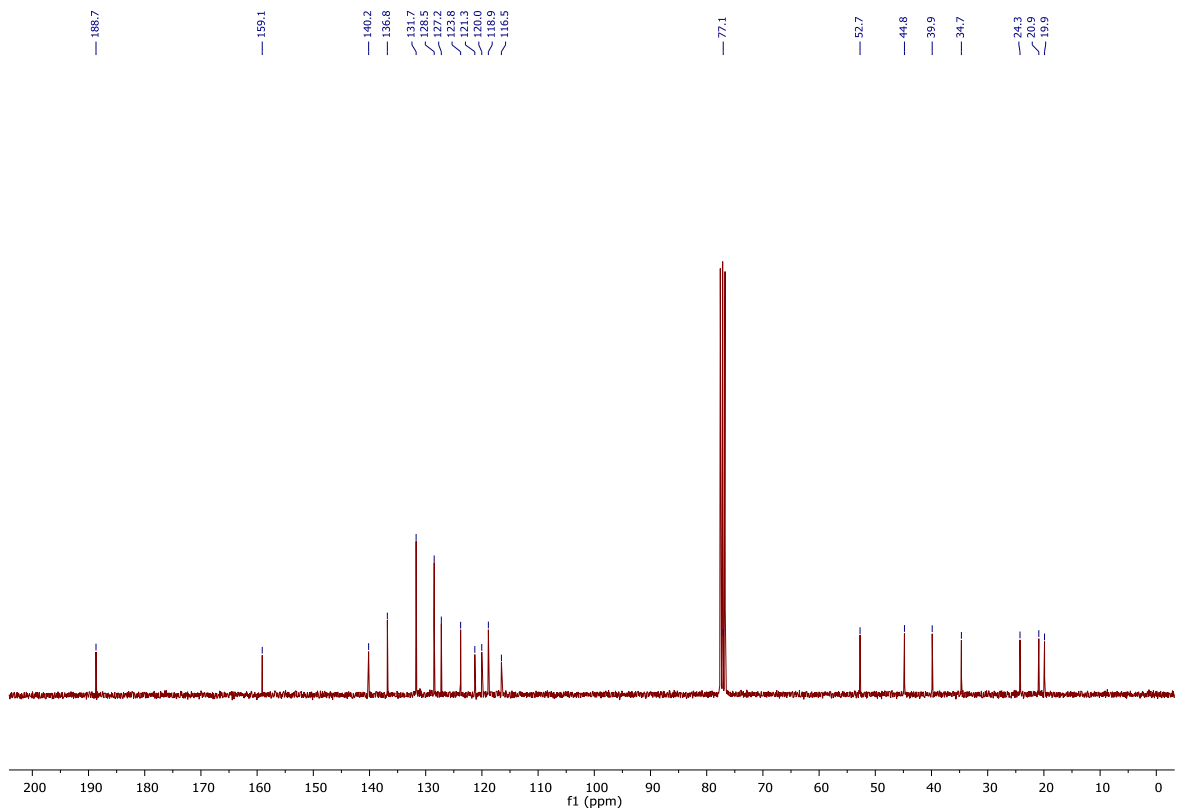

<sup>13</sup>C-NMR (75 MHz, CDCl<sub>3</sub>)

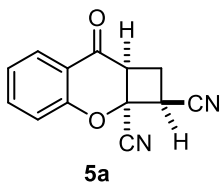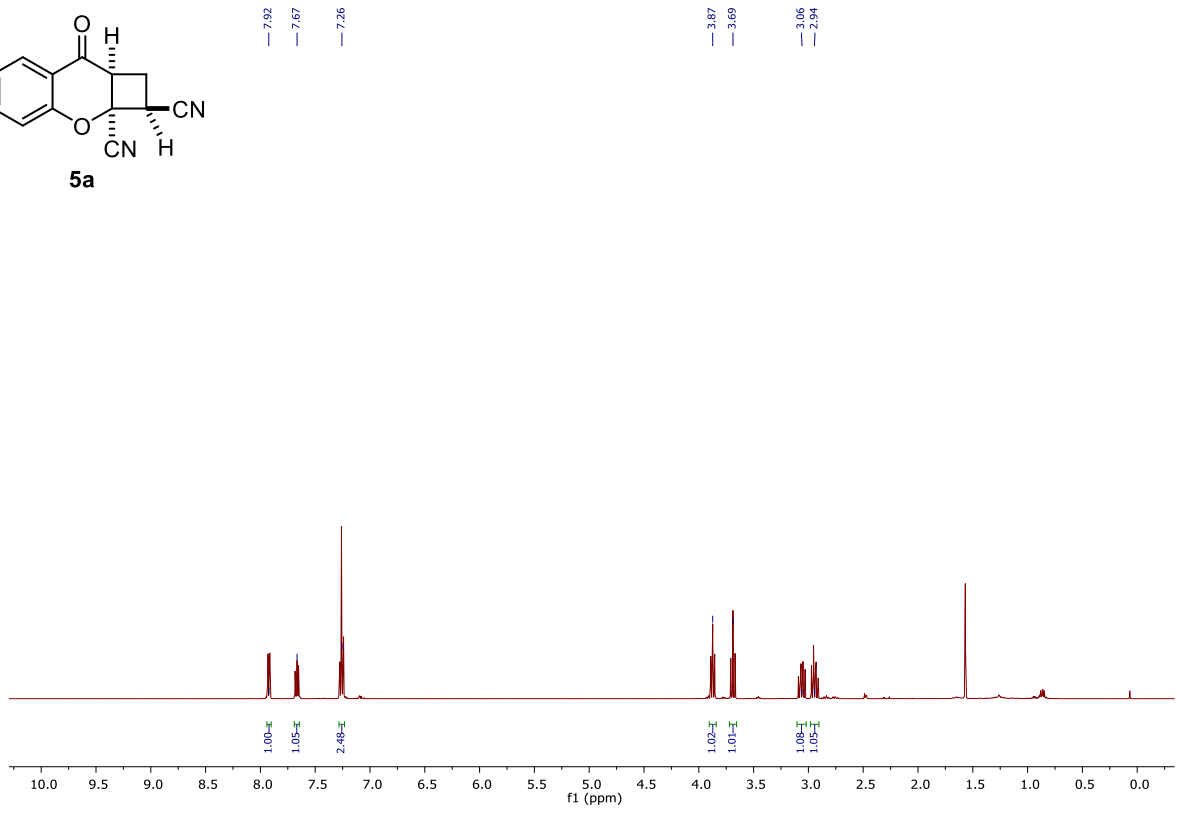

<sup>1</sup>H-NMR (500 MHz, CDCl<sub>3</sub>)

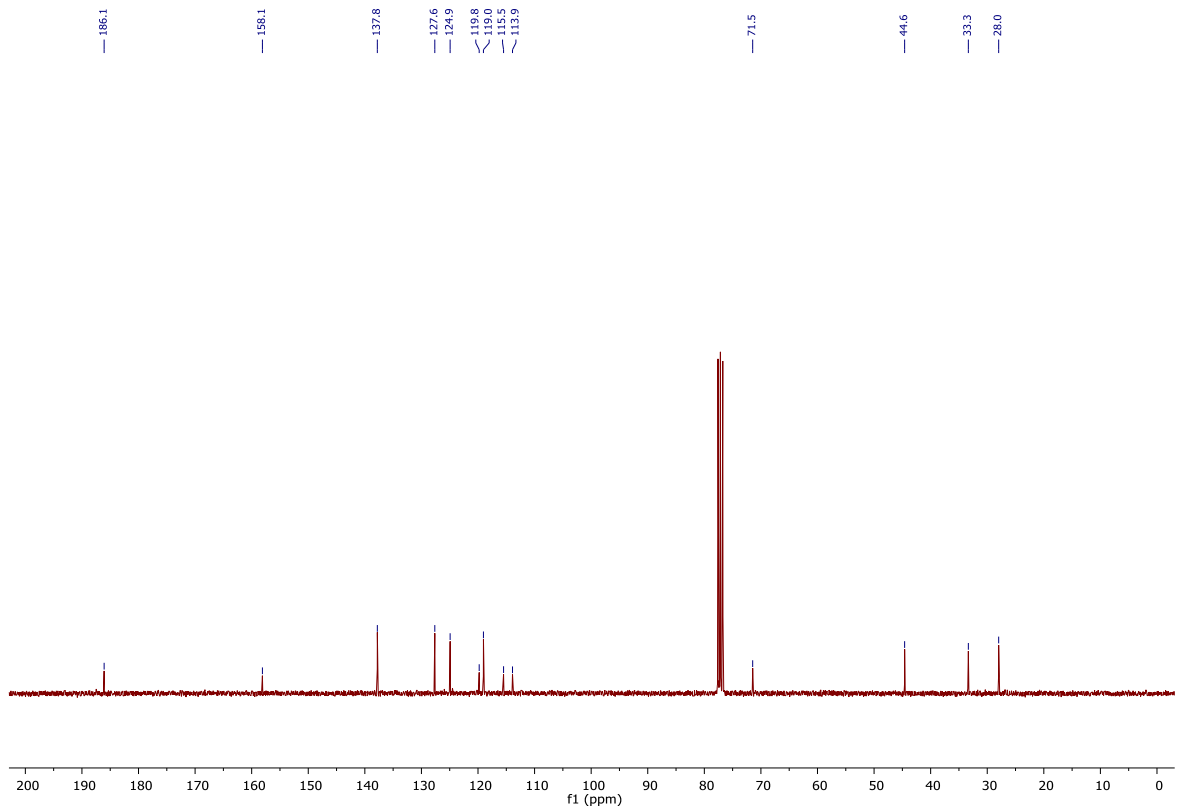

<sup>13</sup>C-NMR (75 MHz, CDCl<sub>3</sub>)

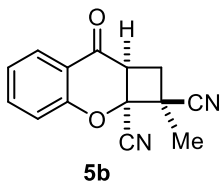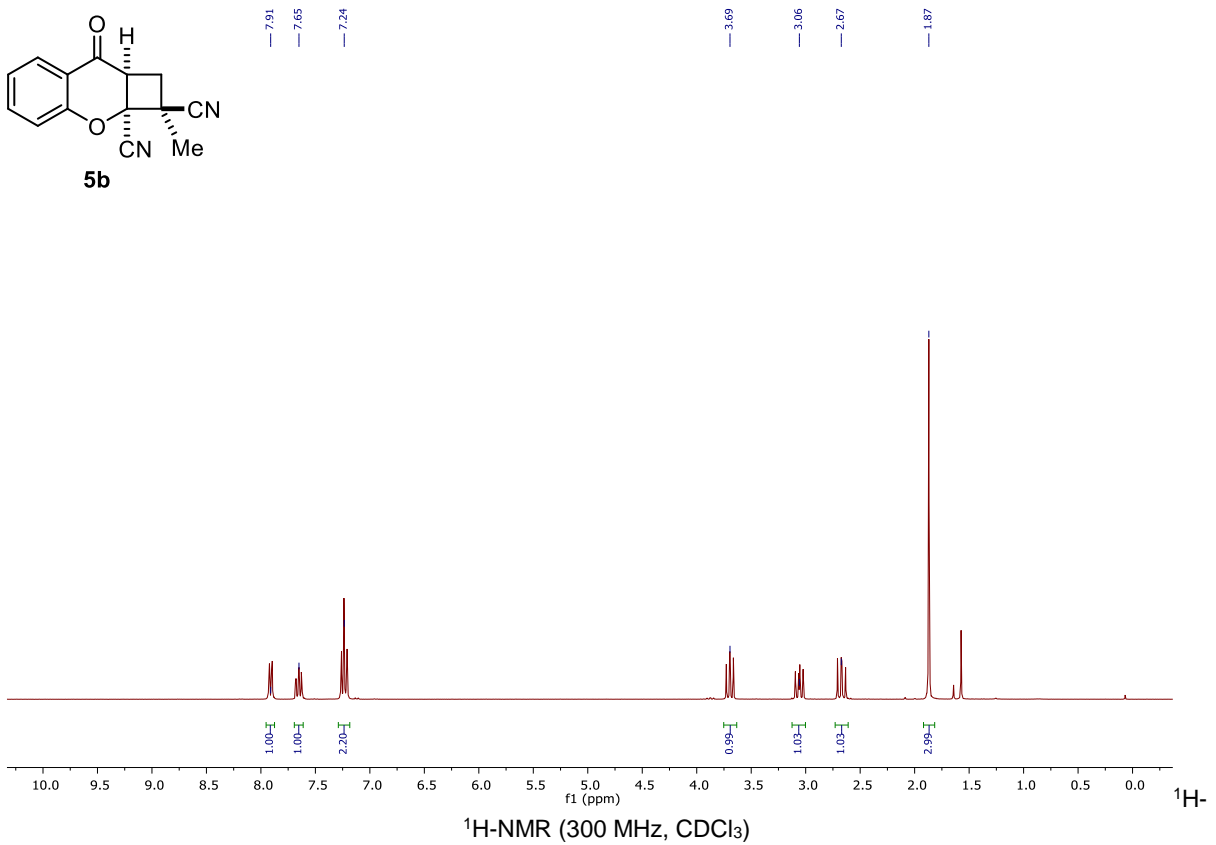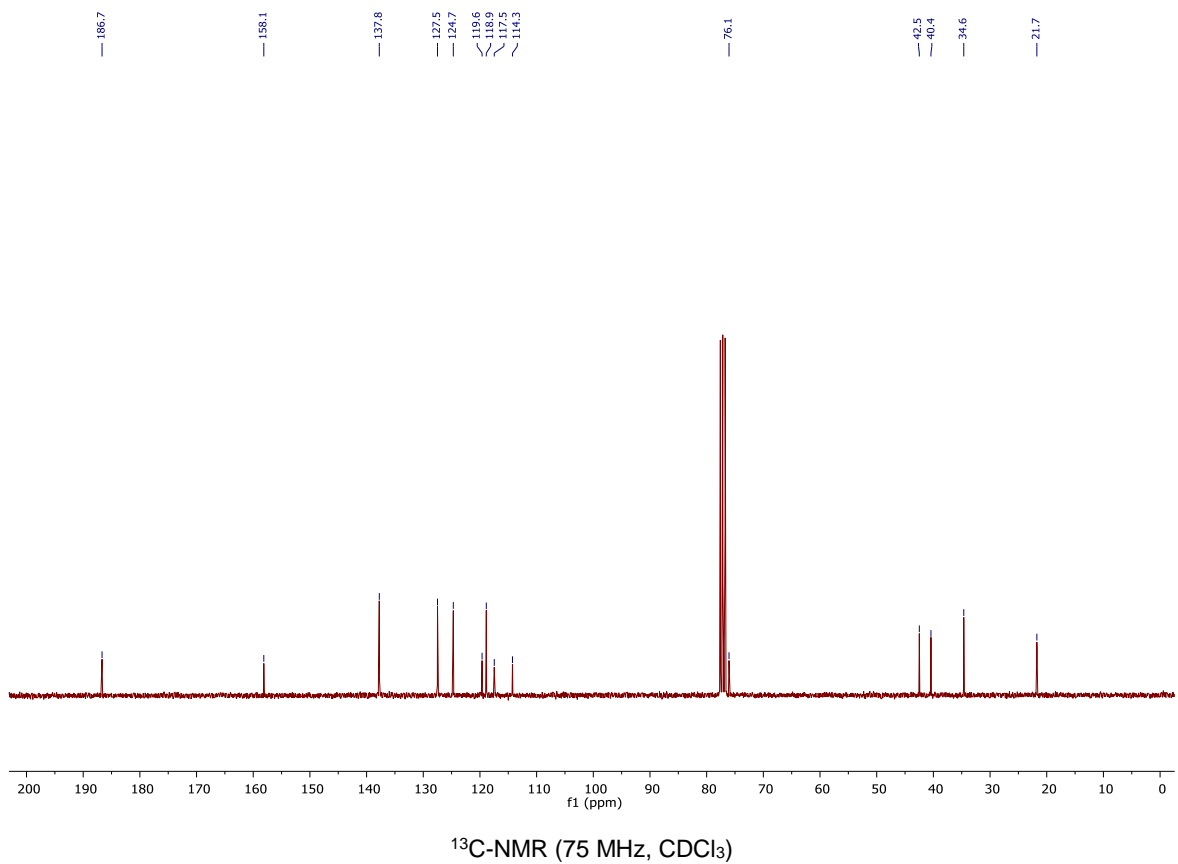

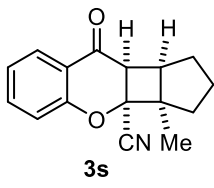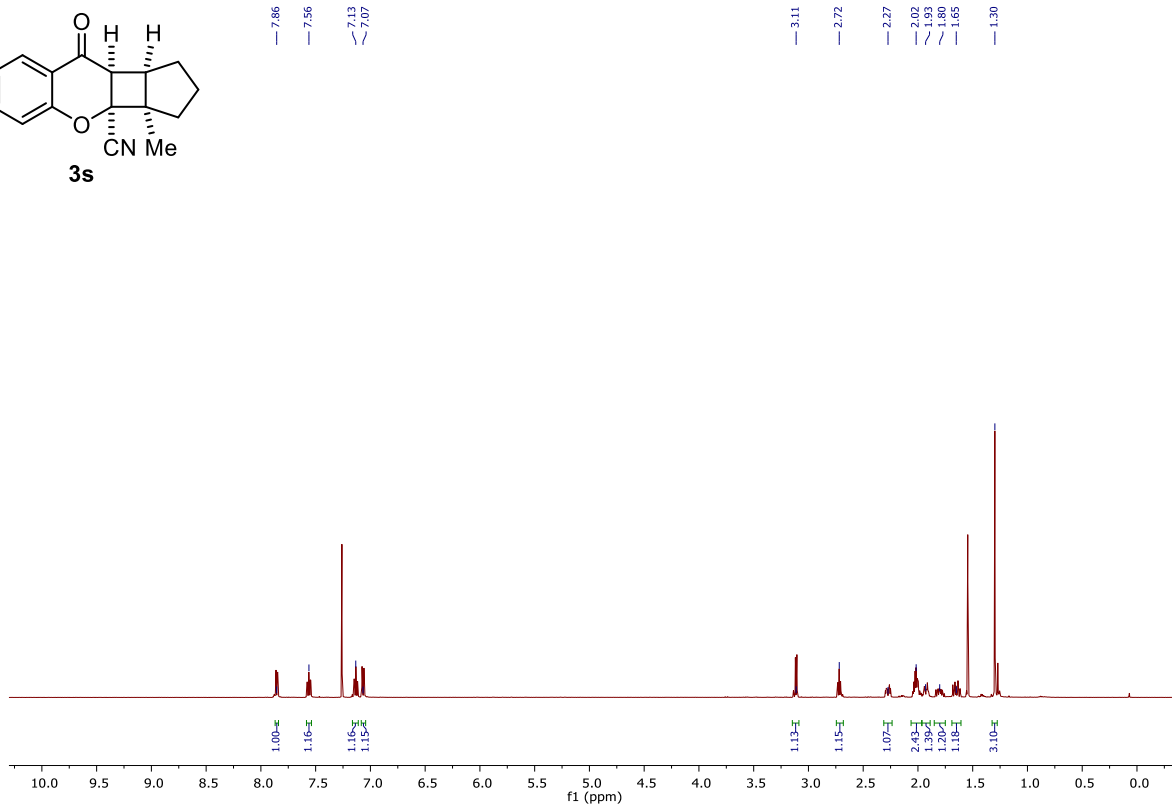

<sup>1</sup>H-NMR (500 MHz, CDCl<sub>3</sub>)

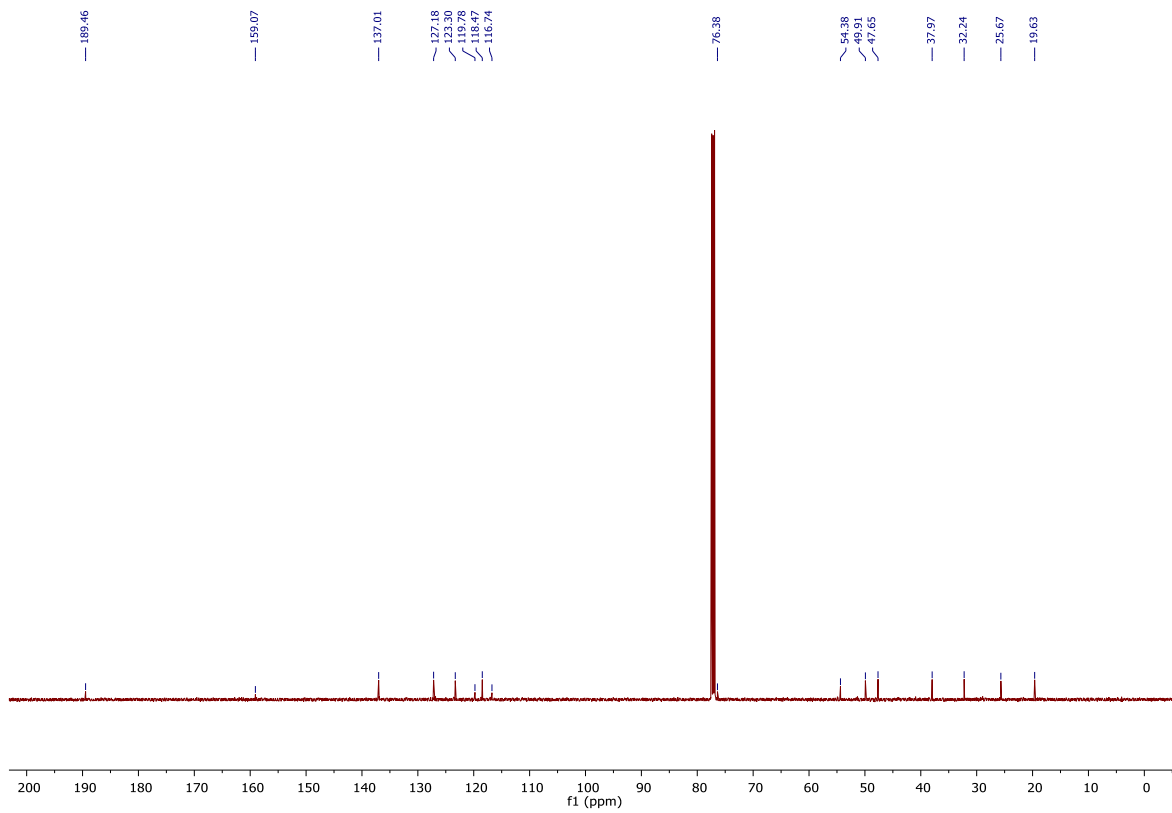

<sup>13</sup>C-NMR (126 MHz, CDCl<sub>3</sub>)

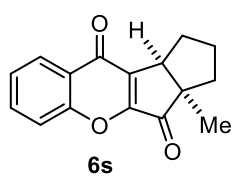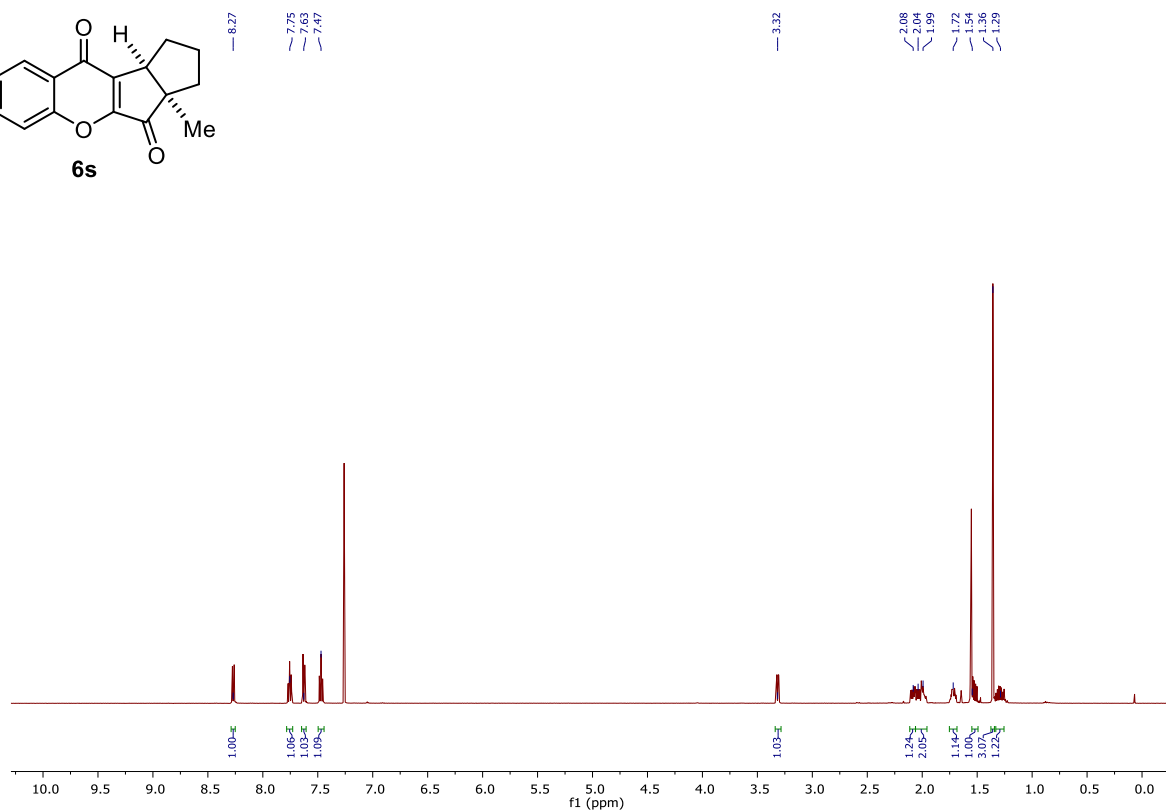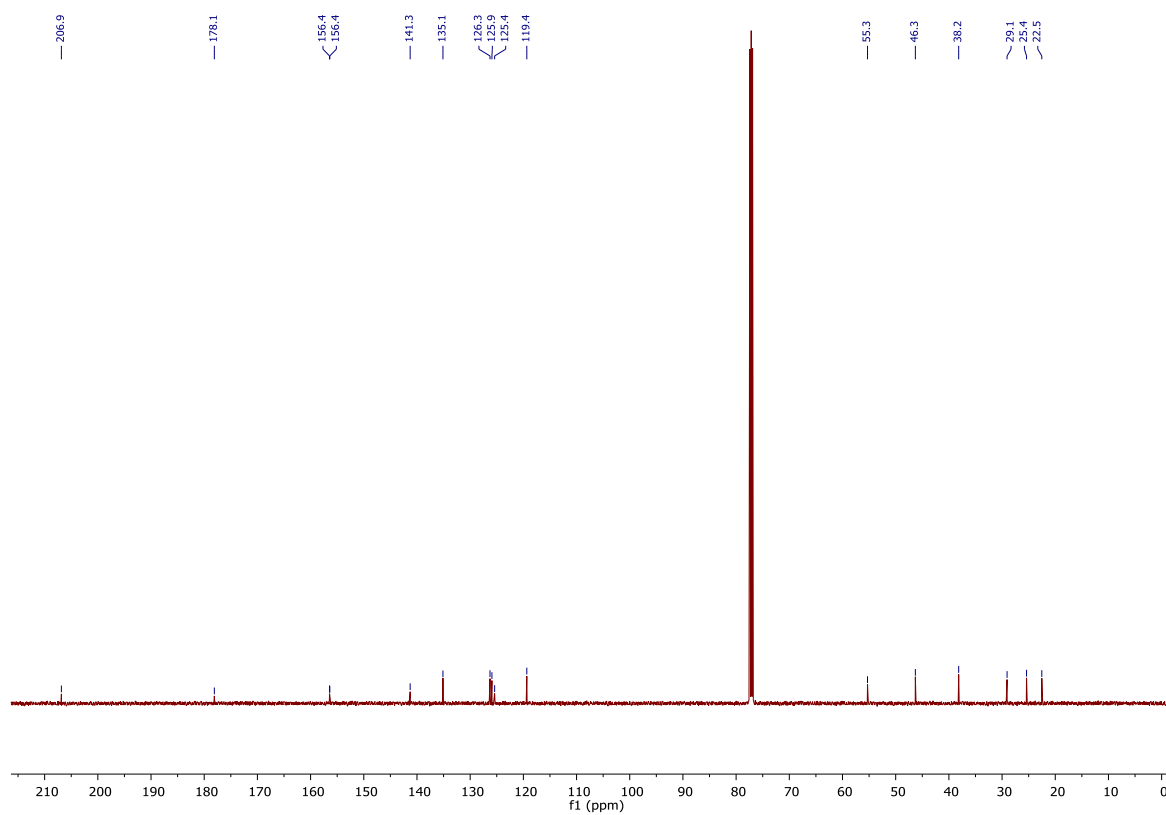

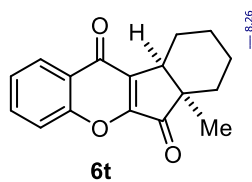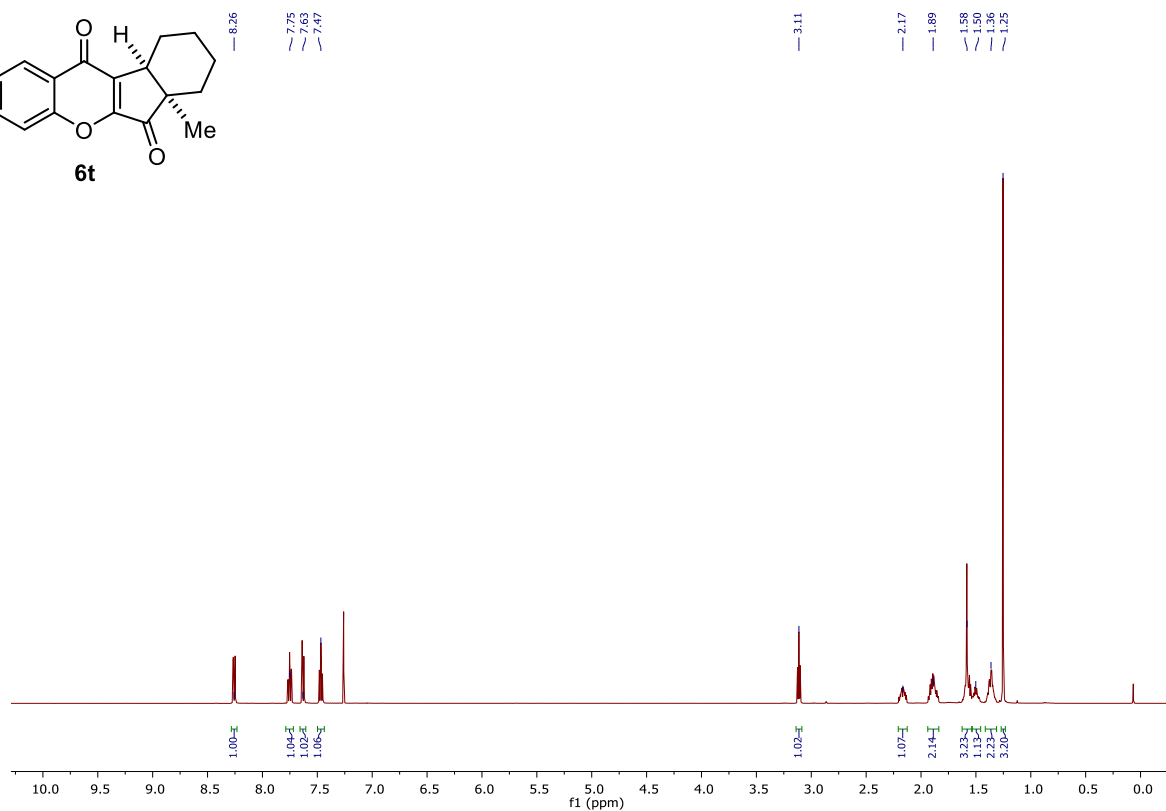

<sup>1</sup>H-NMR (500 MHz, CDCl<sub>3</sub>)

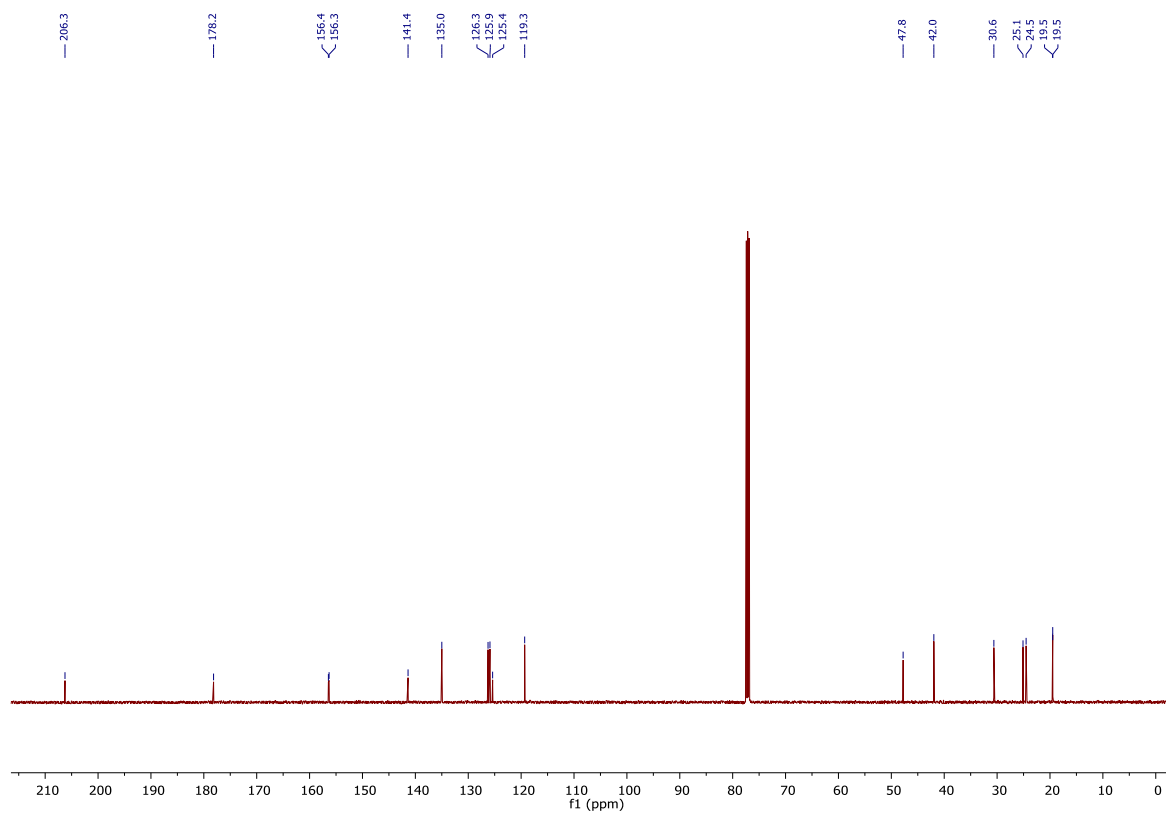

<sup>13</sup>C-NMR (126 MHz, CDCl<sub>3</sub>)

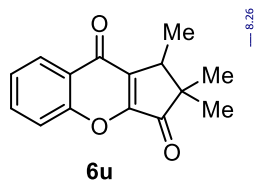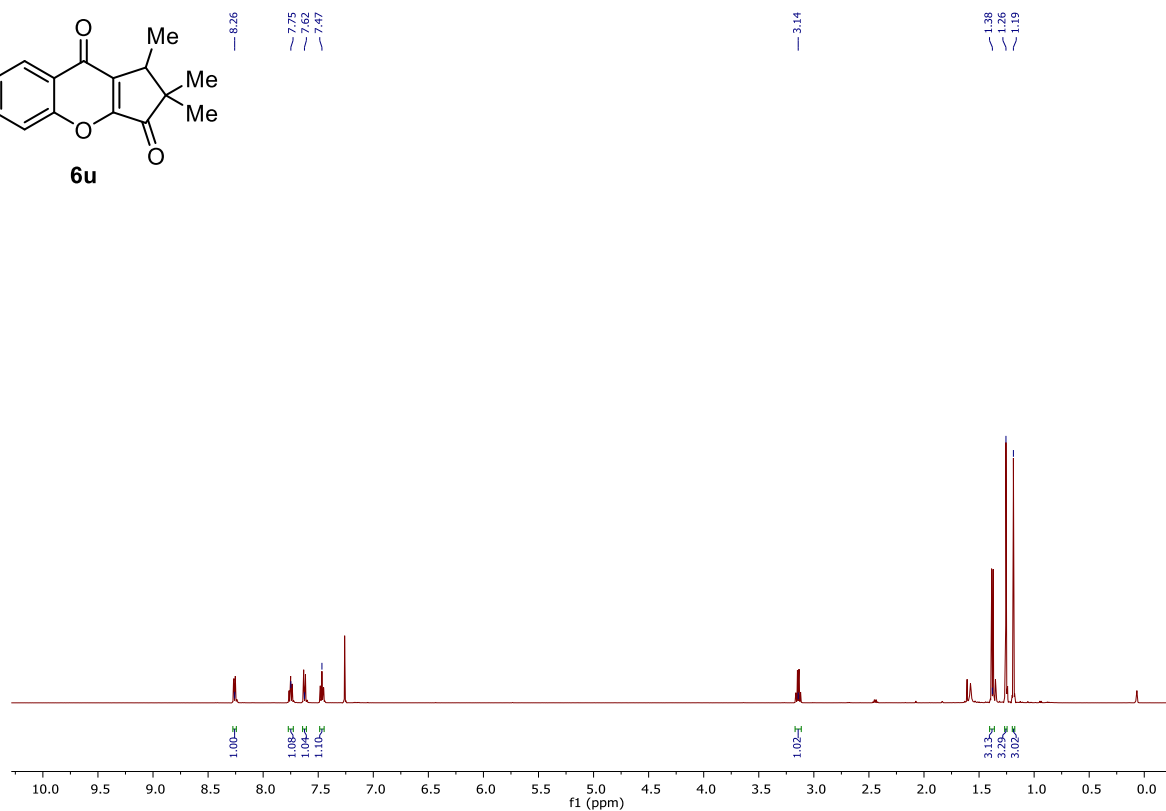

<sup>1</sup>H-NMR (500 MHz, CDCl<sub>3</sub>)

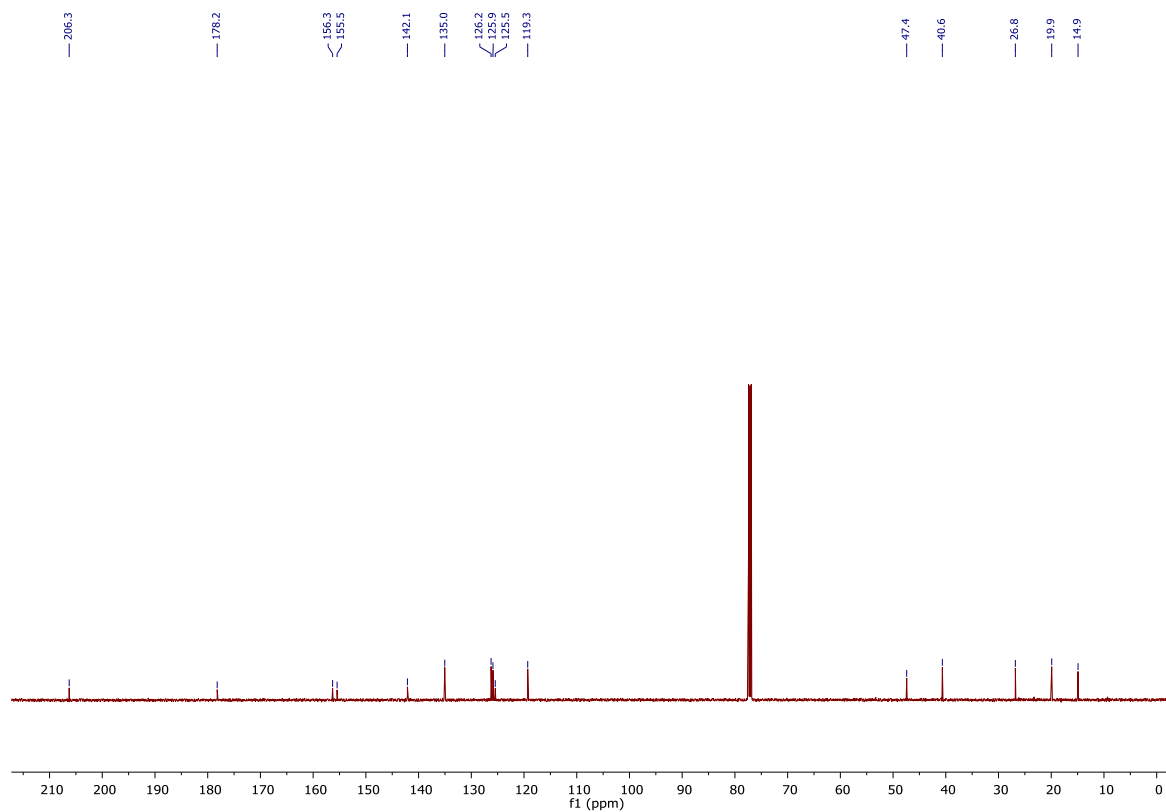

<sup>13</sup>C-NMR (126 MHz, CDCl<sub>3</sub>)

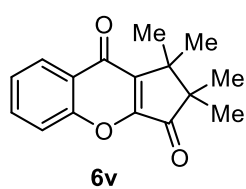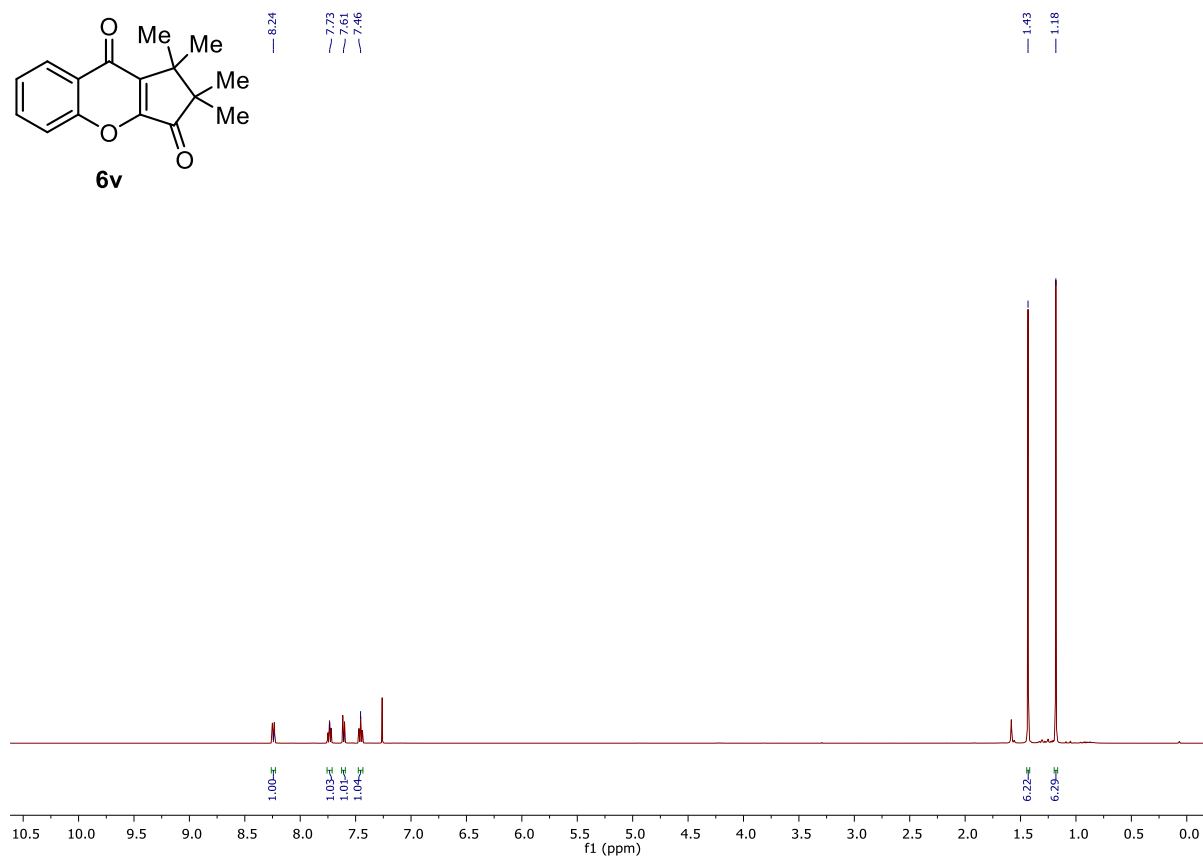

<sup>1</sup>H-NMR (500 MHz, CDCl<sub>3</sub>)

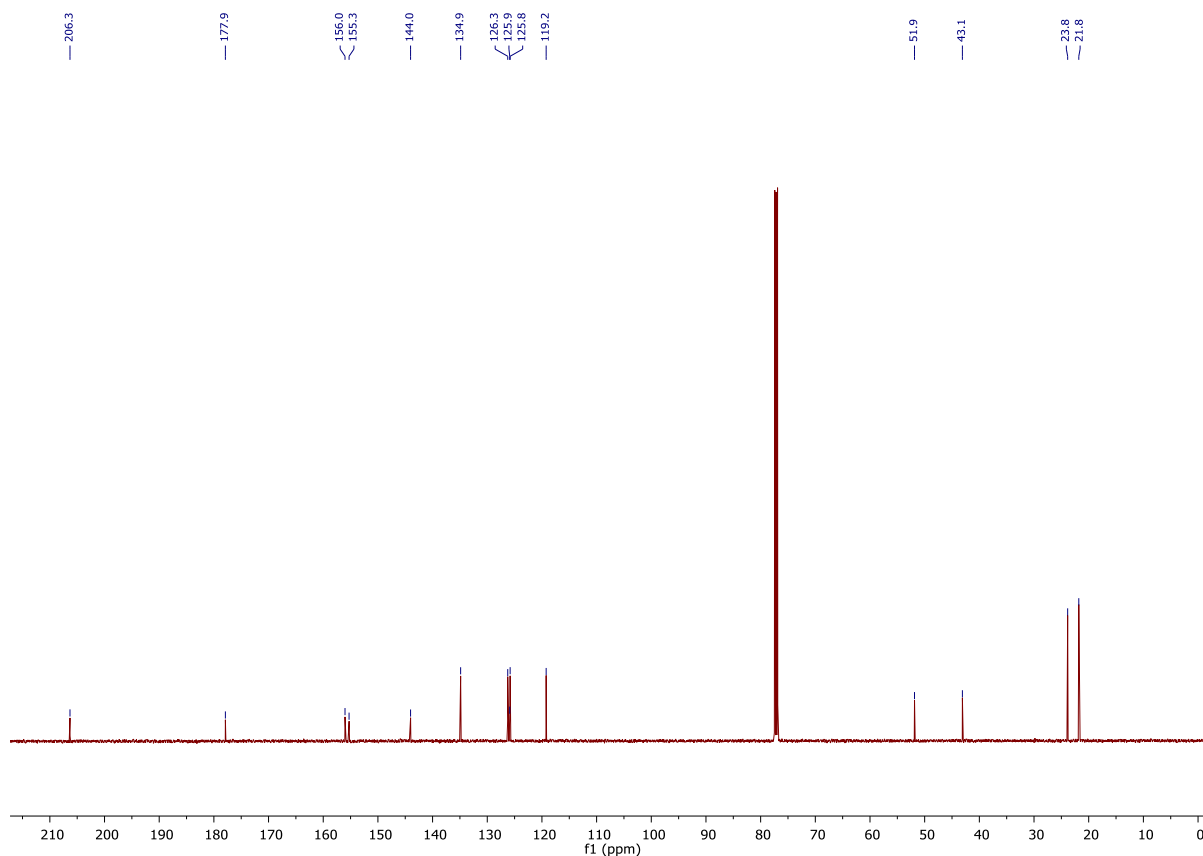

<sup>13</sup>C-NMR (126 MHz, CDCl<sub>3</sub>)
